# Supplementary material
Source: PubMed Central journal article supplement (PMC9189256)

Supplemental Table 1: Full Information Maximum Likelihood Multiple Group Path Analyses Estimating Pre-Pandemic Adolescent Psychological and Behavioral Adjustment on Maladaptive Behavior during the Pandemic

|                                              | Increase in<br>Internalizing<br>Problems | Increase in<br>Externalizing<br>Problems | Change in<br>Substance Use |
|----------------------------------------------|------------------------------------------|------------------------------------------|----------------------------|
|                                              | b (SE)                                   | b (SE)                                   | b (SE)                     |
| <b>China</b>                                 |                                          |                                          |                            |
| Intercept                                    | 0.15 (0.16)                              | -0.11 (0.18)                             | 0.29 (0.13)*               |
| Externalizing Problems in Adolescence        | -0.03 (0.05)                             | -0.01 (0.05)                             | 0.01 (0.05)                |
| Internalizing Problems in Adolescence        | 0.11 (0.04)*                             | 0.09 (0.05)                              | -0.06 (0.04)               |
| Risk-taking Tendencies in Adolescence        | -0.16 (0.05)**                           | -0.03 (0.04)                             | 0.09 (0.08)                |
| Well-being in Adolescence                    | 0.1 (0.04)**                             | -0.07 (0.04)                             | -0.06 (0.03)*              |
| Confidence in Government's Pandemic Response | -0.07 (0.04)                             | -0.12 (0.04)**                           | -0.04 (0.04)               |
| Male                                         | -0.66 (0.08)**                           | -0.28 (0.07)**                           | -0.1 (0.05)                |
| Parental Education                           | 0.06 (0.04)                              | 0.01 (0.04)                              | 0.07 (0.03)*               |
| Weeks since Schools Closed                   | -0.04 (0.06)                             | 0.09 (0.07)                              | 0.02 (0.06)                |
| <b>Colombia</b>                              |                                          |                                          |                            |
| Intercept                                    | 0.39 (0.13)**                            | 0.17 (0.12)                              | 0.25 (0.12)*               |
| Externalizing Problems in Adolescence        | -0.03 (0.05)                             | -0.01 (0.05)                             | 0.01 (0.05)                |
| Internalizing Problems in Adolescence        | 0.11 (0.04)*                             | 0.09 (0.05)                              | -0.06 (0.04)               |
| Risk-taking Tendencies in Adolescence        | -0.16 (0.05)**                           | -0.03 (0.04)                             | -0.04 (0.03)               |
| Well-being in Adolescence                    | 0.1 (0.04)**                             | -0.07 (0.04)                             | -0.06 (0.03)*              |
| Confidence in Government's Pandemic Response | -0.07 (0.04)                             | -0.12 (0.04)**                           | -0.04 (0.04)               |
| Male                                         | -0.66 (0.08)**                           | -0.28 (0.07)**                           | -0.1 (0.05)                |
| Parental Education                           | 0.06 (0.04)                              | 0.01 (0.04)                              | 0.07 (0.03)*               |
| Weeks since Schools Closed                   | -0.04 (0.06)                             | 0.09 (0.07)                              | 0.02 (0.06)                |
| <b>Italy</b>                                 |                                          |                                          |                            |
| Intercept                                    | 0.13 (0.08)                              | 0.28 (0.09)**                            | -0.15 (0.08)*              |
| Externalizing Problems in Adolescence        | -0.03 (0.05)                             | -0.01 (0.05)                             | -0.25 (0.13)*              |
| Internalizing Problems in Adolescence        | 0.11 (0.04)*                             | 0.09 (0.05)                              | 0.26 (0.13)*               |
| Risk-taking Tendencies in Adolescence        | 0.04 (0.08)                              | -0.03 (0.04)                             | -0.04 (0.03)               |
| Well-being in Adolescence                    | -0.21 (0.07)**                           | -0.07 (0.04)                             | -0.06 (0.03)*              |
| Confidence in Government's Pandemic Response | -0.07 (0.04)                             | -0.12 (0.04)**                           | -0.04 (0.04)               |
| Male                                         | -0.66 (0.08)**                           | -0.28 (0.07)**                           | -0.1 (0.05)                |
| Parental Education                           | 0.06 (0.04)                              | 0.01 (0.04)                              | 0.07 (0.03)*               |
| Weeks since Schools Closed                   | -0.04 (0.06)                             | 0.09 (0.07)                              | 0.02 (0.06)                |
| <b>Jordan</b>                                |                                          |                                          |                            |
| Intercept                                    | 0.02 (0.16)                              | 0.31 (0.12)**                            | 0.27 (0.07)**              |
| Externalizing Problems in Adolescence        | -0.03 (0.05)                             | -0.01 (0.05)                             | 0.01 (0.05)                |
| Internalizing Problems in Adolescence        | 0.11 (0.04)*                             | 0.09 (0.05)                              | -0.06 (0.04)               |
| Risk-taking Tendencies in Adolescence        | -0.16 (0.05)**                           | -0.03 (0.04)                             | -0.04 (0.03)               |
| Well-being in Adolescence                    | 0.1 (0.04)**                             | -0.07 (0.04)                             | -0.06 (0.03)*              |
| Confidence in Government's Pandemic Response | -0.07 (0.04)                             | -0.12 (0.04)**                           | -0.04 (0.04)               |
| Male                                         | -0.16 (0.19)                             | -0.28 (0.07)**                           | -0.1 (0.05)                |
| Parental Education                           | 0.06 (0.04)                              | 0.01 (0.04)                              | 0.07 (0.03)*               |
| Weeks since Schools Closed                   | 0.67 (0.23)**                            | 0.09 (0.07)                              | 0.02 (0.06)                |
| <b>Kenya</b>                                 |                                          |                                          |                            |

|                                              |                |                |                |
|----------------------------------------------|----------------|----------------|----------------|
| Intercept                                    | 0.01 (0.18)    | -0.22 (0.16)   | -0.14 (0.18)   |
| Externalizing Problems in Adolescence        | -0.03 (0.05)   | -0.01 (0.05)   | 0.01 (0.05)    |
| Internalizing Problems in Adolescence        | 0.11 (0.04)*   | 0.09 (0.05)    | -0.06 (0.04)   |
| Risk-taking Tendencies in Adolescence        | -0.16 (0.05)** | -0.03 (0.04)   | -0.04 (0.03)   |
| Well-being in Adolescence                    | 0.1 (0.04)**   | -0.07 (0.04)   | -0.06 (0.03)*  |
| Confidence in Government's Pandemic Response | -0.07 (0.04)   | -0.12 (0.04)** | -0.04 (0.04)   |
| Male                                         | 0.03 (0.21)    | -0.28 (0.07)** | -0.1 (0.05)    |
| Parental Education                           | 0.06 (0.04)    | 0.01 (0.04)    | 0.07 (0.03)*   |
| Weeks since Schools Closed                   | -0.04 (0.06)   | 0.09 (0.07)    | 0.02 (0.06)    |
| <b>Philippines</b>                           |                |                |                |
| Intercept                                    | 0.75 (0.12)**  | -1.12 (0.47)*  | -0.7 (0.18)**  |
| Externalizing Problems in Adolescence        | -0.03 (0.05)   | -0.01 (0.05)   | 0.01 (0.05)    |
| Internalizing Problems in Adolescence        | 0.11 (0.04)*   | 0.09 (0.05)    | -0.06 (0.04)   |
| Risk-taking Tendencies in Adolescence        | -0.16 (0.05)** | -0.03 (0.04)   | -0.04 (0.03)   |
| Well-being in Adolescence                    | 0.1 (0.04)**   | -0.07 (0.04)   | -0.06 (0.03)*  |
| Confidence in Government's Pandemic Response | -0.07 (0.04)   | -0.38 (0.08)** | -0.04 (0.04)   |
| Male                                         | -0.66 (0.08)** | -0.28 (0.07)** | -0.1 (0.05)    |
| Parental Education                           | 0.06 (0.04)    | 0.01 (0.04)    | 0.07 (0.03)*   |
| Weeks since Schools Closed                   | -0.04 (0.06)   | -1.55 (0.63)*  | 0.02 (0.06)    |
| <b>Sweden</b>                                |                |                |                |
| Intercept                                    | 0.14 (0.13)    | 0.24 (0.13)    | 0.1 (0.09)     |
| Externalizing Problems in Adolescence        | -0.03 (0.05)   | -0.01 (0.05)   | 0.01 (0.05)    |
| Internalizing Problems in Adolescence        | 0.11 (0.04)*   | 0.09 (0.05)    | -0.06 (0.04)   |
| Risk-taking Tendencies in Adolescence        | 0.22 (0.15)    | -0.03 (0.04)   | -0.04 (0.03)   |
| Well-being in Adolescence                    | 0.1 (0.04)**   | -0.07 (0.04)   | -0.06 (0.03)*  |
| Confidence in Government's Pandemic Response | -0.07 (0.04)   | -0.12 (0.04)** | -0.04 (0.04)   |
| Male                                         | -0.66 (0.08)** | -0.28 (0.07)** | -0.1 (0.05)    |
| Parental Education                           | 0.06 (0.04)    | 0.01 (0.04)    | 0.07 (0.03)*   |
| Weeks since Schools Closed                   | -0.04 (0.06)   | 0.09 (0.07)    | 0.02 (0.06)    |
| <b>Thailand</b>                              |                |                |                |
| Intercept                                    | -0.43 (0.15)** | 1.53 (0.68)*   | -0.07 (0.12)   |
| Externalizing Problems in Adolescence        | -0.03 (0.05)   | -0.01 (0.05)   | -0.77 (0.17)** |
| Internalizing Problems in Adolescence        | 0.11 (0.04)*   | 0.09 (0.05)    | 0.41 (0.08)**  |
| Risk-taking Tendencies in Adolescence        | -0.16 (0.05)** | -0.03 (0.04)   | -0.04 (0.03)   |
| Well-being in Adolescence                    | 0.1 (0.04)**   | -0.07 (0.04)   | -0.06 (0.03)*  |
| Confidence in Government's Pandemic Response | -0.07 (0.04)   | -0.12 (0.04)** | -0.04 (0.04)   |
| Male                                         | -0.21 (0.18)   | -0.28 (0.07)** | -0.1 (0.05)    |
| Parental Education                           | 0.06 (0.04)    | 0.01 (0.04)    | 0.07 (0.03)*   |
| Weeks since Schools Closed                   | -0.04 (0.06)   | 2 (0.65)**     | 0.02 (0.06)    |
| <b>United States</b>                         |                |                |                |
| Intercept                                    | 0.42 (0.1)**   | 0.09 (0.09)    | 0.27 (0.11)*   |
| Externalizing Problems in Adolescence        | -0.03 (0.05)   | -0.01 (0.05)   | 0.01 (0.05)    |
| Internalizing Problems in Adolescence        | 0.11 (0.04)*   | 0.09 (0.05)    | -0.06 (0.04)   |
| Risk-taking Tendencies in Adolescence        | 0.25 (0.1)**   | -0.03 (0.04)   | -0.04 (0.03)   |
| Well-being in Adolescence                    | -0.27 (0.08)** | -0.3 (0.08)**  | -0.06 (0.03)*  |
| Confidence in Government's Pandemic Response | -0.07 (0.04)   | -0.12 (0.04)** | -0.04 (0.04)   |
| Male                                         | -0.66 (0.08)** | -0.28 (0.07)** | -0.1 (0.05)    |
| Parental Education                           | 0.06 (0.04)    | 0.29 (0.09)**  | 0.07 (0.03)*   |

|                            |                    |                    |                    |
|----------------------------|--------------------|--------------------|--------------------|
| Weeks since Schools Closed | -0.04 (0.06)       | 0.09 (0.07)        | 0.02 (0.06)        |
| Fit Statistics             |                    |                    |                    |
| Chi Square (DOF), p-value  | 60.55 (55), p=0.28 | 59.89 (59), p=0.44 | 61.94 (59), p=0.37 |
| RMSEA                      | 0.03               | 0.01               | 0.02               |
| CFI                        | 0.96               | 0.99               | 0.95               |
| SRMR                       | 0.03               | 0.03               | 0.03               |

---

b=standardized coefficient. \* $p < .05$ , \*\* $p < .01$ .

Supplemental Table 2: Full Information Maximum Likelihood Multiple Group Path Analyses Estimating Moderation of Relations between Pre-Pandemic Adolescent Internalizing Problems and Maladaptive Behavior during the Pandemic by Confidence in Government's Response

|                                              | Increase in<br>Internalizing<br>Problems | Increase in<br>Externalizing<br>Problems | Change in<br>Substance Use |
|----------------------------------------------|------------------------------------------|------------------------------------------|----------------------------|
|                                              | b (SE)                                   | b (SE)                                   | b (SE)                     |
| <b>China</b>                                 |                                          |                                          |                            |
| Intercept                                    | 0.16 (0.16)                              | -0.12 (0.18)                             | 0.31 (0.13)*               |
| Externalizing Problems in Adolescence        | -0.02 (0.05)                             | -0.01 (0.05)                             | 0.01 (0.05)                |
| Internalizing Problems in Adolescence        | 0.1 (0.04)*                              | 0.09 (0.05)                              | -0.08 (0.04)*              |
| Risk-taking Tendencies in Adolescence        | -0.21 (0.05)**                           | -0.03 (0.04)                             | 0.09 (0.08)                |
| Well-being in Adolescence                    | 0.11 (0.04)**                            | -0.07 (0.04)                             | -0.06 (0.03)*              |
| Confidence in Government's Pandemic Response | -0.08 (0.04)*                            | -0.12 (0.04)**                           | -0.05 (0.04)               |
| Male                                         | -0.66 (0.08)**                           | -0.27 (0.07)**                           | -0.1 (0.05)                |
| Parental Education                           | 0.07 (0.04)                              | 0.01 (0.04)                              | 0.07 (0.03)*               |
| Weeks since Schools Closed                   | -0.04 (0.06)                             | 0.09 (0.07)                              | 0.01 (0.06)                |
| Internalizing*Government Confidence          | -0.05 (0.03)                             | -0.01 (0.04)                             | 0.05 (0.03)                |
| <b>Colombia</b>                              |                                          |                                          |                            |
| Intercept                                    | 0.35 (0.13)*                             | 0.16 (0.12)                              | 0.27 (0.12)*               |
| Externalizing Problems in Adolescence        | -0.02 (0.05)                             | -0.01 (0.05)                             | 0.01 (0.05)                |
| Internalizing Problems in Adolescence        | 0.1 (0.04)*                              | 0.09 (0.05)                              | -0.08 (0.04)*              |
| Risk-taking Tendencies in Adolescence        | 0.07 (0.14)                              | -0.03 (0.04)                             | -0.04 (0.03)               |
| Well-being in Adolescence                    | 0.11 (0.04)**                            | -0.07 (0.04)                             | -0.06 (0.03)*              |
| Confidence in Government's Pandemic Response | -0.08 (0.04)*                            | -0.12 (0.04)**                           | -0.05 (0.04)               |
| Male                                         | -0.66 (0.08)**                           | -0.27 (0.07)**                           | -0.1 (0.05)                |
| Parental Education                           | 0.07 (0.04)                              | 0.01 (0.04)                              | 0.07 (0.03)*               |
| Weeks since Schools Closed                   | -0.04 (0.06)                             | 0.09 (0.07)                              | 0.01 (0.06)                |
| Internalizing*Government Confidence          | -0.05 (0.03)                             | -0.01 (0.04)                             | 0.05 (0.03)                |
| <b>Italy</b>                                 |                                          |                                          |                            |
| Intercept                                    | 0.15 (0.08)                              | 0.28 (0.09)**                            | -0.15 (0.08)*              |
| Externalizing Problems in Adolescence        | -0.02 (0.05)                             | -0.01 (0.05)                             | -0.24 (0.12)               |
| Internalizing Problems in Adolescence        | 0.1 (0.04)*                              | 0.09 (0.05)                              | 0.25 (0.12)*               |
| Risk-taking Tendencies in Adolescence        | 0.03 (0.08)                              | -0.03 (0.04)                             | -0.04 (0.03)               |
| Well-being in Adolescence                    | -0.23 (0.07)**                           | -0.07 (0.04)                             | -0.06 (0.03)*              |
| Confidence in Government's Pandemic Response | -0.08 (0.04)*                            | -0.12 (0.04)**                           | -0.05 (0.04)               |
| Male                                         | -0.66 (0.08)**                           | -0.27 (0.07)**                           | -0.1 (0.05)                |
| Parental Education                           | 0.07 (0.04)                              | 0.01 (0.04)                              | 0.07 (0.03)*               |
| Weeks since Schools Closed                   | -0.04 (0.06)                             | 0.09 (0.07)                              | 0.01 (0.06)                |
| Internalizing*Government Confidence          | 0.11 (0.05)*                             | -0.01 (0.04)                             | 0.05 (0.03)                |
| <b>Jordan</b>                                |                                          |                                          |                            |
| Intercept                                    | -0.04 (0.16)                             | 0.31 (0.12)**                            | 0.28 (0.07)**              |
| Externalizing Problems in Adolescence        | -0.02 (0.05)                             | -0.01 (0.05)                             | 0.01 (0.05)                |
| Internalizing Problems in Adolescence        | 0.1 (0.04)*                              | 0.09 (0.05)                              | -0.08 (0.04)*              |
| Risk-taking Tendencies in Adolescence        | -0.21 (0.05)**                           | -0.03 (0.04)                             | -0.04 (0.03)               |
| Well-being in Adolescence                    | 0.11 (0.04)**                            | -0.07 (0.04)                             | -0.06 (0.03)*              |
| Confidence in Government's Pandemic Response | -0.08 (0.04)*                            | -0.12 (0.04)**                           | -0.05 (0.04)               |

|                                              |                |                |                |
|----------------------------------------------|----------------|----------------|----------------|
| Male                                         | -0.1 (0.19)    | -0.27 (0.07)** | -0.1 (0.05)    |
| Parental Education                           | 0.07 (0.04)    | 0.01 (0.04)    | 0.07 (0.03)*   |
| Weeks since Schools Closed                   | 0.69 (0.22)**  | 0.09 (0.07)    | 0.01 (0.06)    |
| Internalizing*Government Confidence          | -0.05 (0.03)   | -0.01 (0.04)   | 0.05 (0.03)    |
| Kenya                                        |                |                |                |
| Intercept                                    | -6.84 (3.52)   | -0.22 (0.16)   | -0.14 (0.18)   |
| Externalizing Problems in Adolescence        | -0.02 (0.05)   | -0.01 (0.05)   | 0.01 (0.05)    |
| Internalizing Problems in Adolescence        | 0.1 (0.04)*    | 0.09 (0.05)    | -0.08 (0.04)*  |
| Risk-taking Tendencies in Adolescence        | -0.21 (0.05)** | -0.03 (0.04)   | -0.04 (0.03)   |
| Well-being in Adolescence                    | 0.11 (0.04)**  | -0.07 (0.04)   | -0.06 (0.03)*  |
| Confidence in Government's Pandemic Response | -0.08 (0.04)*  | -0.12 (0.04)** | -0.05 (0.04)   |
| Male                                         | -0.01 (0.2)    | -0.27 (0.07)** | -0.1 (0.05)    |
| Parental Education                           | 0.07 (0.04)    | 0.01 (0.04)    | 0.07 (0.03)*   |
| Weeks since Schools Closed                   | 4.2 (2.2)      | 0.09 (0.07)    | 0.01 (0.06)    |
| Internalizing*Government Confidence          | -0.05 (0.03)   | -0.01 (0.04)   | 0.05 (0.03)    |
| Philippines                                  |                |                |                |
| Intercept                                    | 0.75 (0.12)**  | -1.12 (0.48)*  | -0.71 (0.18)** |
| Externalizing Problems in Adolescence        | -0.02 (0.05)   | -0.01 (0.05)   | 0.01 (0.05)    |
| Internalizing Problems in Adolescence        | 0.1 (0.04)*    | 0.09 (0.05)    | -0.08 (0.04)*  |
| Risk-taking Tendencies in Adolescence        | -0.21 (0.05)** | -0.03 (0.04)   | -0.04 (0.03)   |
| Well-being in Adolescence                    | 0.11 (0.04)**  | -0.07 (0.04)   | -0.06 (0.03)*  |
| Confidence in Government's Pandemic Response | -0.08 (0.04)*  | -0.38 (0.08)** | -0.05 (0.04)   |
| Male                                         | -0.66 (0.08)** | -0.27 (0.07)** | -0.1 (0.05)    |
| Parental Education                           | 0.07 (0.04)    | 0.01 (0.04)    | 0.07 (0.03)*   |
| Weeks since Schools Closed                   | -0.04 (0.06)   | -1.54 (0.64)*  | 0.01 (0.06)    |
| Internalizing*Government Confidence          | -0.05 (0.03)   | -0.01 (0.04)   | 0.05 (0.03)    |
| Sweden                                       |                |                |                |
| Intercept                                    | 0.13 (0.14)    | 0.23 (0.13)    | 0.1 (0.08)     |
| Externalizing Problems in Adolescence        | -0.02 (0.05)   | -0.01 (0.05)   | 0.01 (0.05)    |
| Internalizing Problems in Adolescence        | 0.1 (0.04)*    | 0.09 (0.05)    | -0.08 (0.04)*  |
| Risk-taking Tendencies in Adolescence        | 0.23 (0.15)    | -0.03 (0.04)   | -0.04 (0.03)   |
| Well-being in Adolescence                    | 0.11 (0.04)**  | -0.07 (0.04)   | -0.06 (0.03)*  |
| Confidence in Government's Pandemic Response | -0.08 (0.04)*  | -0.12 (0.04)** | -0.05 (0.04)   |
| Male                                         | -0.66 (0.08)** | -0.27 (0.07)** | -0.1 (0.05)    |
| Parental Education                           | 0.07 (0.04)    | 0.01 (0.04)    | 0.07 (0.03)*   |
| Weeks since Schools Closed                   | -0.04 (0.06)   | 0.09 (0.07)    | 0.01 (0.06)    |
| Internalizing*Government Confidence          | -0.05 (0.03)   | -0.01 (0.04)   | 0.05 (0.03)    |
| Thailand                                     |                |                |                |
| Intercept                                    | -0.44 (0.15)** | 1.54 (0.68)*   | -0.11 (0.13)   |
| Externalizing Problems in Adolescence        | -0.02 (0.05)   | -0.01 (0.05)   | -0.76 (0.16)** |
| Internalizing Problems in Adolescence        | 0.1 (0.04)*    | 0.09 (0.05)    | 0.27 (0.11)*   |
| Risk-taking Tendencies in Adolescence        | -0.21 (0.05)** | -0.03 (0.04)   | -0.04 (0.03)   |
| Well-being in Adolescence                    | 0.11 (0.04)**  | -0.07 (0.04)   | -0.06 (0.03)*  |
| Confidence in Government's Pandemic Response | -0.08 (0.04)*  | -0.12 (0.04)** | -0.05 (0.04)   |
| Male                                         | -0.2 (0.18)    | -0.27 (0.07)** | -0.1 (0.05)    |
| Parental Education                           | 0.07 (0.04)    | 0.01 (0.04)    | 0.07 (0.03)*   |
| Weeks since Schools Closed                   | -0.04 (0.06)   | 2 (0.65)**     | 0.01 (0.06)    |
| Internalizing*Government Confidence          | -0.05 (0.03)   | -0.01 (0.04)   | -0.17 (0.11)   |

|                                              |                            |                            |                           |
|----------------------------------------------|----------------------------|----------------------------|---------------------------|
| United States                                |                            |                            |                           |
| Intercept                                    | 0.39 (0.1)**               | 0.09 (0.1)                 | 0.28 (0.11)*              |
| Externalizing Problems in Adolescence        | -0.02 (0.05)               | -0.01 (0.05)               | 0.01 (0.05)               |
| Internalizing Problems in Adolescence        | 0.1 (0.04)*                | 0.09 (0.05)                | -0.08 (0.04)*             |
| Risk-taking Tendencies in Adolescence        | 0.26 (0.09)**              | -0.03 (0.04)               | -0.04 (0.03)              |
| Well-being in Adolescence                    | -0.27 (0.08)**             | -0.29 (0.08)**             | -0.06 (0.03)*             |
| Confidence in Government's Pandemic Response | -0.08 (0.04)*              | -0.12 (0.04)**             | -0.05 (0.04)              |
| Male                                         | -0.66 (0.08)**             | -0.27 (0.07)**             | -0.1 (0.05)               |
| Parental Education                           | 0.07 (0.04)                | 0.29 (0.09)**              | 0.07 (0.03)*              |
| Weeks since Schools Closed                   | -0.04 (0.06)               | 0.09 (0.07)                | 0.01 (0.06)               |
| Internalizing*Government Confidence          | -0.05 (0.03)               | -0.01 (0.04)               | 0.05 (0.03)               |
| Model Fit Statistics                         |                            |                            |                           |
| Chi Square (DOF), <i>p</i> -value            | 71.39 (60), <i>p</i> =0.15 | 71.16 (67), <i>p</i> =0.34 | 65.26 (66), <i>p</i> =0.5 |
| RMSEA                                        | 0.04                       | 0.02                       | 0                         |
| CFI                                          | 0.93                       | 0.95                       | 1                         |
| SRMR                                         | 0.03                       | 0.031                      | 0.031                     |

b=standardized coefficient. \**p* < .05, \*\**p* < .01.

Supplemental Table 3: Full Information Maximum Likelihood Multiple Group Path Analyses Estimating Moderation of Relations between Pre-Pandemic Adolescent Internalizing Problems and Maladaptive Behavior during the Pandemic by Gender

|                                              | Increase in<br>Internalizing<br>Problems | Increase in<br>Externalizing<br>Problems | Change in<br>Substance Use |
|----------------------------------------------|------------------------------------------|------------------------------------------|----------------------------|
|                                              | b (SE)                                   | b (SE)                                   | b (SE)                     |
| <b>China</b>                                 |                                          |                                          |                            |
| Intercept                                    | 0.16 (0.16)                              | -0.08 (0.18)                             | 0.21 (0.14)                |
| Externalizing Problems in Adolescence        | -0.03 (0.05)                             | -0.01 (0.05)                             | 0.01 (0.05)                |
| Internalizing Problems in Adolescence        | 0.13 (0.05)*                             | 0.09 (0.06)                              | -0.04 (0.04)               |
| Risk-taking Tendencies in Adolescence        | -0.11 (0.04)*                            | -0.02 (0.04)                             | 0 (0.03)                   |
| Well-being in Adolescence                    | 0.11 (0.04)**                            | -0.07 (0.04)                             | -0.06 (0.03)*              |
| Confidence in Government's Pandemic Response | -0.06 (0.04)                             | -0.12 (0.04)**                           | -0.03 (0.04)               |
| Male                                         | -0.65 (0.08)**                           | -0.28 (0.07)**                           | -0.1 (0.05)                |
| Parental Education                           | 0.06 (0.04)                              | 0.01 (0.04)                              | 0.05 (0.03)                |
| Weeks since Schools Closed                   | -0.04 (0.06)                             | 0.08 (0.07)                              | 0.03 (0.06)                |
| Internalizing*Male                           | -0.06 (0.07)                             | -0.01 (0.08)                             | -0.06 (0.05)               |
| <b>Colombia</b>                              |                                          |                                          |                            |
| Intercept                                    | 0.38 (0.13)**                            | 0.17 (0.12)                              | 0.23 (0.12)                |
| Externalizing Problems in Adolescence        | -0.03 (0.05)                             | -0.01 (0.05)                             | 0.01 (0.05)                |
| Internalizing Problems in Adolescence        | 0.13 (0.05)*                             | 0.09 (0.06)                              | -0.04 (0.04)               |
| Risk-taking Tendencies in Adolescence        | -0.11 (0.04)*                            | -0.02 (0.04)                             | 0 (0.03)                   |
| Well-being in Adolescence                    | 0.11 (0.04)**                            | -0.07 (0.04)                             | -0.06 (0.03)*              |
| Confidence in Government's Pandemic Response | -0.06 (0.04)                             | -0.12 (0.04)**                           | -0.03 (0.04)               |
| Male                                         | -0.65 (0.08)**                           | -0.28 (0.07)**                           | -0.1 (0.05)                |
| Parental Education                           | 0.06 (0.04)                              | 0.01 (0.04)                              | 0.05 (0.03)                |
| Weeks since Schools Closed                   | -0.04 (0.06)                             | 0.08 (0.07)                              | 0.03 (0.06)                |
| Internalizing*Male                           | -0.06 (0.07)                             | -0.01 (0.08)                             | -0.06 (0.05)               |
| <b>Italy</b>                                 |                                          |                                          |                            |
| Intercept                                    | 0.18 (0.08)*                             | 0.27 (0.09)**                            | -0.16 (0.08)*              |
| Externalizing Problems in Adolescence        | -0.03 (0.05)                             | -0.01 (0.05)                             | -0.26 (0.13)*              |
| Internalizing Problems in Adolescence        | 0.13 (0.05)*                             | 0.09 (0.06)                              | 0.28 (0.13)*               |
| Risk-taking Tendencies in Adolescence        | -0.11 (0.04)*                            | -0.02 (0.04)                             | 0 (0.03)                   |
| Well-being in Adolescence                    | -0.2 (0.07)**                            | -0.07 (0.04)                             | -0.06 (0.03)*              |
| Confidence in Government's Pandemic Response | -0.06 (0.04)                             | -0.12 (0.04)**                           | -0.03 (0.04)               |
| Male                                         | -0.65 (0.08)**                           | -0.28 (0.07)**                           | -0.1 (0.05)                |
| Parental Education                           | 0.06 (0.04)                              | 0.01 (0.04)                              | 0.05 (0.03)                |
| Weeks since Schools Closed                   | -0.04 (0.06)                             | 0.08 (0.07)                              | 0.03 (0.06)                |
| Internalizing*Male                           | -0.06 (0.07)                             | -0.01 (0.08)                             | -0.06 (0.05)               |
| <b>Jordan</b>                                |                                          |                                          |                            |
| Intercept                                    | 0.09 (0.15)                              | 0.32 (0.12)**                            | 0.32 (0.07)**              |
| Externalizing Problems in Adolescence        | -0.03 (0.05)                             | -0.01 (0.05)                             | 0.01 (0.05)                |
| Internalizing Problems in Adolescence        | 0.13 (0.05)*                             | 0.09 (0.06)                              | -0.04 (0.04)               |
| Risk-taking Tendencies in Adolescence        | -0.11 (0.04)*                            | -0.02 (0.04)                             | 0 (0.03)                   |
| Well-being in Adolescence                    | 0.11 (0.04)**                            | -0.07 (0.04)                             | -0.06 (0.03)*              |
| Confidence in Government's Pandemic Response | -0.06 (0.04)                             | -0.12 (0.04)**                           | -0.03 (0.04)               |

|                                              |                |                |                |
|----------------------------------------------|----------------|----------------|----------------|
| Male                                         | -0.19 (0.19)   | -0.28 (0.07)** | -0.1 (0.05)    |
| Parental Education                           | 0.06 (0.04)    | 0.01 (0.04)    | 0.05 (0.03)    |
| Weeks since Schools Closed                   | 0.66 (0.23)**  | 0.08 (0.07)    | 0.03 (0.06)    |
| Internalizing*Male                           | -0.06 (0.07)   | -0.01 (0.08)   | -0.06 (0.05)   |
| Kenya                                        |                |                |                |
| Intercept                                    | 0.05 (0.18)    | -0.19 (0.16)   | -0.16 (0.18)   |
| Externalizing Problems in Adolescence        | -0.03 (0.05)   | -0.01 (0.05)   | 0.01 (0.05)    |
| Internalizing Problems in Adolescence        | 0.13 (0.05)*   | 0.09 (0.06)    | -0.04 (0.04)   |
| Risk-taking Tendencies in Adolescence        | -0.11 (0.04)*  | -0.02 (0.04)   | 0 (0.03)       |
| Well-being in Adolescence                    | 0.11 (0.04)**  | -0.07 (0.04)   | -0.06 (0.03)*  |
| Confidence in Government's Pandemic Response | -0.06 (0.04)   | -0.12 (0.04)** | -0.03 (0.04)   |
| Male                                         | 0 (0.21)       | -0.28 (0.07)** | -0.1 (0.05)    |
| Parental Education                           | 0.06 (0.04)    | 0.01 (0.04)    | 0.05 (0.03)    |
| Weeks since Schools Closed                   | -0.04 (0.06)   | 0.08 (0.07)    | 0.03 (0.06)    |
| Internalizing*Male                           | -0.06 (0.07)   | -0.01 (0.08)   | -0.06 (0.05)   |
| Philippines                                  |                |                |                |
| Intercept                                    | 0.74 (0.12)**  | 0.09 (0.12)    | -0.68 (0.18)** |
| Externalizing Problems in Adolescence        | -0.03 (0.05)   | -0.01 (0.05)   | 0.01 (0.05)    |
| Internalizing Problems in Adolescence        | 0.13 (0.05)*   | 0.09 (0.06)    | -0.04 (0.04)   |
| Risk-taking Tendencies in Adolescence        | -0.11 (0.04)*  | -0.02 (0.04)   | 0 (0.03)       |
| Well-being in Adolescence                    | 0.11 (0.04)**  | -0.07 (0.04)   | -0.06 (0.03)*  |
| Confidence in Government's Pandemic Response | -0.06 (0.04)   | -0.37 (0.08)** | -0.03 (0.04)   |
| Male                                         | -0.65 (0.08)** | -0.28 (0.07)** | -0.1 (0.05)    |
| Parental Education                           | 0.06 (0.04)    | 0.01 (0.04)    | 0.05 (0.03)    |
| Weeks since Schools Closed                   | -0.04 (0.06)   | 0.08 (0.07)    | 0.03 (0.06)    |
| Internalizing*Male                           | -0.06 (0.07)   | -0.01 (0.08)   | -0.06 (0.05)   |
| Sweden                                       |                |                |                |
| Intercept                                    | 0.12 (0.14)    | 0.23 (0.13)    | 0.11 (0.09)    |
| Externalizing Problems in Adolescence        | -0.03 (0.05)   | -0.01 (0.05)   | 0.01 (0.05)    |
| Internalizing Problems in Adolescence        | 0.13 (0.05)*   | 0.09 (0.06)    | -0.04 (0.04)   |
| Risk-taking Tendencies in Adolescence        | 0.23 (0.14)    | -0.02 (0.04)   | 0 (0.03)       |
| Well-being in Adolescence                    | 0.11 (0.04)**  | -0.07 (0.04)   | -0.06 (0.03)*  |
| Confidence in Government's Pandemic Response | -0.06 (0.04)   | -0.12 (0.04)** | -0.03 (0.04)   |
| Male                                         | -0.65 (0.08)** | -0.28 (0.07)** | -0.1 (0.05)    |
| Parental Education                           | 0.06 (0.04)    | 0.01 (0.04)    | 0.05 (0.03)    |
| Weeks since Schools Closed                   | -0.04 (0.06)   | 0.08 (0.07)    | 0.03 (0.06)    |
| Internalizing*Male                           | -0.06 (0.07)   | -0.01 (0.08)   | -0.06 (0.05)   |
| Thailand                                     |                |                |                |
| Intercept                                    | -0.44 (0.15)** | 1.52 (0.68)*   | -0.06 (0.12)   |
| Externalizing Problems in Adolescence        | -0.03 (0.05)   | -0.01 (0.05)   | -0.76 (0.17)** |
| Internalizing Problems in Adolescence        | 0.13 (0.05)*   | 0.09 (0.06)    | 0.43 (0.08)**  |
| Risk-taking Tendencies in Adolescence        | -0.11 (0.04)*  | -0.02 (0.04)   | 0 (0.03)       |
| Well-being in Adolescence                    | 0.11 (0.04)**  | -0.07 (0.04)   | -0.06 (0.03)*  |
| Confidence in Government's Pandemic Response | -0.06 (0.04)   | -0.12 (0.04)** | -0.03 (0.04)   |
| Male                                         | -0.2 (0.18)    | -0.28 (0.07)** | -0.1 (0.05)    |
| Parental Education                           | 0.06 (0.04)    | 0.01 (0.04)    | 0.05 (0.03)    |
| Weeks since Schools Closed                   | -0.04 (0.06)   | 1.99 (0.65)**  | 0.03 (0.06)    |
| Internalizing*Male                           | -0.06 (0.07)   | -0.01 (0.08)   | -0.06 (0.05)   |



|                                              |                    |                    |                    |
|----------------------------------------------|--------------------|--------------------|--------------------|
| United States                                |                    |                    |                    |
| Intercept                                    | 0.41 (0.1)**       | 0.08 (0.1)         | 0.22 (0.11)*       |
| Externalizing Problems in Adolescence        | -0.03 (0.05)       | -0.01 (0.05)       | 0.01 (0.05)        |
| Internalizing Problems in Adolescence        | 0.13 (0.05)*       | 0.09 (0.06)        | -0.04 (0.04)       |
| Risk-taking Tendencies in Adolescence        | 0.25 (0.1)**       | -0.02 (0.04)       | 0 (0.03)           |
| Well-being in Adolescence                    | -0.27 (0.08)**     | -0.3 (0.08)**      | -0.06 (0.03)*      |
| Confidence in Government's Pandemic Response | -0.06 (0.04)       | -0.12 (0.04)**     | -0.03 (0.04)       |
| Male                                         | -0.65 (0.08)**     | -0.28 (0.07)**     | -0.1 (0.05)        |
| Parental Education                           | 0.06 (0.04)        | 0.28 (0.09)**      | 0.22 (0.1)*        |
| Weeks since Schools Closed                   | -0.04 (0.06)       | 0.08 (0.07)        | 0.03 (0.06)        |
| Internalizing*Male                           | -0.06 (0.07)       | -0.01 (0.08)       | -0.06 (0.05)       |
| Model Fit Statistics                         |                    |                    |                    |
| Chi Square (DOF), p-value                    | 67.56 (64), p=0.36 | 72.08 (68), p=0.34 | 67.84 (67), p=0.45 |
| RMSEA                                        | 0.02               | 0.02               | 0.01               |
| CFI                                          | 0.97               | 0.95               | 0.98               |
| SRMR                                         | 0.03               | 0.034              | 0.032              |

b=standardized coefficient. \* $p < .05$ , \*\* $p < .01$ .

Supplemental Table 4: Full Information Maximum Likelihood Multiple Group Path Analyses Estimating Moderation of Relations between Pre-Pandemic Adolescent Internalizing Problems and Maladaptive Behavior during the Pandemic by Parental Education

|                                              | Increase in<br>Internalizing<br>Problems | Increase in<br>Externalizing<br>Problems | Change in<br>Substance Use |
|----------------------------------------------|------------------------------------------|------------------------------------------|----------------------------|
|                                              | b (SE)                                   | b (SE)                                   | b (SE)                     |
| <b>China</b>                                 |                                          |                                          |                            |
| Intercept                                    | 0.15 (0.16)                              | -0.15 (0.18)                             | 0.29 (0.13)*               |
| Externalizing Problems in Adolescence        | -0.03 (0.05)                             | -0.01 (0.05)                             | 0.01 (0.05)                |
| Internalizing Problems in Adolescence        | 0.11 (0.04)**                            | 0.09 (0.05)                              | -0.06 (0.04)               |
| Risk-taking Tendencies in Adolescence        | -0.16 (0.05)**                           | -0.03 (0.04)                             | 0.09 (0.08)                |
| Well-being in Adolescence                    | 0.11 (0.04)**                            | -0.08 (0.04)*                            | -0.06 (0.03)*              |
| Confidence in Government's Pandemic Response | -0.07 (0.04)                             | -0.11 (0.04)**                           | -0.04 (0.04)               |
| Male                                         | -0.66 (0.08)**                           | -0.27 (0.07)**                           | -0.1 (0.05)                |
| Parental Education                           | 0.06 (0.04)                              | -0.01 (0.04)                             | 0.07 (0.03)*               |
| Weeks since Schools Closed                   | -0.04 (0.06)                             | 0.1 (0.07)                               | 0.02 (0.06)                |
| Internalizing*Parental Education             | 0.01 (0.03)                              | 0.03 (0.04)                              | -0.02 (0.03)               |
| <b>Colombia</b>                              |                                          |                                          |                            |
| Intercept                                    | 0.4 (0.13)**                             | 0.18 (0.12)                              | 0.24 (0.12)                |
| Externalizing Problems in Adolescence        | -0.03 (0.05)                             | -0.01 (0.05)                             | 0.01 (0.05)                |
| Internalizing Problems in Adolescence        | 0.11 (0.04)**                            | 0.09 (0.05)                              | -0.06 (0.04)               |
| Risk-taking Tendencies in Adolescence        | -0.16 (0.05)**                           | -0.03 (0.04)                             | -0.04 (0.03)               |
| Well-being in Adolescence                    | 0.11 (0.04)**                            | -0.08 (0.04)*                            | -0.06 (0.03)*              |
| Confidence in Government's Pandemic Response | -0.07 (0.04)                             | -0.11 (0.04)**                           | -0.04 (0.04)               |
| Male                                         | -0.66 (0.08)**                           | -0.27 (0.07)**                           | -0.1 (0.05)                |
| Parental Education                           | 0.06 (0.04)                              | -0.01 (0.04)                             | 0.07 (0.03)*               |
| Weeks since Schools Closed                   | -0.04 (0.06)                             | 0.1 (0.07)                               | 0.02 (0.06)                |
| Internalizing*Parental Education             | 0.01 (0.03)                              | 0.03 (0.04)                              | -0.02 (0.03)               |
| <b>Italy</b>                                 |                                          |                                          |                            |
| Intercept                                    | 0.14 (0.08)                              | 0.28 (0.09)**                            | -0.16 (0.08)*              |
| Externalizing Problems in Adolescence        | -0.03 (0.05)                             | -0.01 (0.05)                             | -0.25 (0.13)*              |
| Internalizing Problems in Adolescence        | 0.11 (0.04)**                            | 0.09 (0.05)                              | 0.25 (0.12)*               |
| Risk-taking Tendencies in Adolescence        | 0.03 (0.08)                              | -0.03 (0.04)                             | -0.04 (0.03)               |
| Well-being in Adolescence                    | -0.21 (0.07)**                           | -0.08 (0.04)*                            | -0.06 (0.03)*              |
| Confidence in Government's Pandemic Response | -0.07 (0.04)                             | -0.11 (0.04)**                           | -0.04 (0.04)               |
| Male                                         | -0.66 (0.08)**                           | -0.27 (0.07)**                           | -0.1 (0.05)                |
| Parental Education                           | 0.06 (0.04)                              | -0.01 (0.04)                             | 0.07 (0.03)*               |
| Weeks since Schools Closed                   | -0.04 (0.06)                             | 0.1 (0.07)                               | 0.02 (0.06)                |
| Internalizing*Parental Education             | 0.01 (0.03)                              | 0.03 (0.04)                              | -0.02 (0.03)               |
| <b>Jordan</b>                                |                                          |                                          |                            |
| Intercept                                    | 0.02 (0.16)                              | 0.31 (0.12)**                            | 0.27 (0.07)**              |
| Externalizing Problems in Adolescence        | -0.03 (0.05)                             | -0.01 (0.05)                             | 0.01 (0.05)                |
| Internalizing Problems in Adolescence        | 0.11 (0.04)**                            | 0.09 (0.05)                              | -0.06 (0.04)               |
| Risk-taking Tendencies in Adolescence        | -0.16 (0.05)**                           | -0.03 (0.04)                             | -0.04 (0.03)               |
| Well-being in Adolescence                    | 0.11 (0.04)**                            | -0.08 (0.04)*                            | -0.06 (0.03)*              |
| Confidence in Government's Pandemic Response | -0.07 (0.04)                             | -0.11 (0.04)**                           | -0.04 (0.04)               |

|                                              |                |                |                |
|----------------------------------------------|----------------|----------------|----------------|
| Male                                         | -0.16 (0.19)   | -0.27 (0.07)** | -0.1 (0.05)    |
| Parental Education                           | 0.06 (0.04)    | -0.01 (0.04)   | 0.07 (0.03)*   |
| Weeks since Schools Closed                   | 0.67 (0.23)**  | 0.1 (0.07)     | 0.02 (0.06)    |
| Internalizing*Parental Education             | 0.01 (0.03)    | 0.03 (0.04)    | -0.02 (0.03)   |
| Kenya                                        |                |                |                |
| Intercept                                    | 0.01 (0.18)    | -0.24 (0.16)   | -0.14 (0.18)   |
| Externalizing Problems in Adolescence        | -0.03 (0.05)   | -0.01 (0.05)   | 0.01 (0.05)    |
| Internalizing Problems in Adolescence        | 0.11 (0.04)**  | 0.09 (0.05)    | -0.06 (0.04)   |
| Risk-taking Tendencies in Adolescence        | -0.16 (0.05)** | -0.03 (0.04)   | -0.04 (0.03)   |
| Well-being in Adolescence                    | 0.11 (0.04)**  | -0.08 (0.04)*  | -0.06 (0.03)*  |
| Confidence in Government's Pandemic Response | -0.07 (0.04)   | -0.11 (0.04)** | -0.04 (0.04)   |
| Male                                         | 0.03 (0.21)    | -0.27 (0.07)** | -0.1 (0.05)    |
| Parental Education                           | 0.06 (0.04)    | -0.01 (0.04)   | 0.07 (0.03)*   |
| Weeks since Schools Closed                   | -0.04 (0.06)   | 0.1 (0.07)     | 0.02 (0.06)    |
| Internalizing*Parental Education             | 0.01 (0.03)    | 0.03 (0.04)    | -0.02 (0.03)   |
| Philippines                                  |                |                |                |
| Intercept                                    | 0.75 (0.12)**  | -1.11 (0.48)*  | -0.7 (0.18)**  |
| Externalizing Problems in Adolescence        | -0.03 (0.05)   | -0.01 (0.05)   | 0.01 (0.05)    |
| Internalizing Problems in Adolescence        | 0.11 (0.04)**  | 0.09 (0.05)    | -0.06 (0.04)   |
| Risk-taking Tendencies in Adolescence        | -0.16 (0.05)** | -0.03 (0.04)   | -0.04 (0.03)   |
| Well-being in Adolescence                    | 0.11 (0.04)**  | -0.08 (0.04)*  | -0.06 (0.03)*  |
| Confidence in Government's Pandemic Response | -0.07 (0.04)   | -0.39 (0.09)** | -0.04 (0.04)   |
| Male                                         | -0.66 (0.08)** | -0.27 (0.07)** | -0.1 (0.05)    |
| Parental Education                           | 0.06 (0.04)    | -0.01 (0.04)   | 0.07 (0.03)*   |
| Weeks since Schools Closed                   | -0.04 (0.06)   | -1.53 (0.64)*  | 0.02 (0.06)    |
| Internalizing*Parental Education             | 0.01 (0.03)    | 0.03 (0.04)    | -0.02 (0.03)   |
| Sweden                                       |                |                |                |
| Intercept                                    | 0.15 (0.14)    | 0.26 (0.13)    | 0.1 (0.09)     |
| Externalizing Problems in Adolescence        | -0.03 (0.05)   | -0.01 (0.05)   | 0.01 (0.05)    |
| Internalizing Problems in Adolescence        | 0.11 (0.04)**  | 0.09 (0.05)    | -0.06 (0.04)   |
| Risk-taking Tendencies in Adolescence        | 0.22 (0.15)    | -0.03 (0.04)   | -0.04 (0.03)   |
| Well-being in Adolescence                    | 0.11 (0.04)**  | -0.08 (0.04)*  | -0.06 (0.03)*  |
| Confidence in Government's Pandemic Response | -0.07 (0.04)   | -0.11 (0.04)** | -0.04 (0.04)   |
| Male                                         | -0.66 (0.08)** | -0.27 (0.07)** | -0.1 (0.05)    |
| Parental Education                           | 0.06 (0.04)    | -0.01 (0.04)   | 0.07 (0.03)*   |
| Weeks since Schools Closed                   | -0.04 (0.06)   | 0.1 (0.07)     | 0.02 (0.06)    |
| Internalizing*Parental Education             | 0.01 (0.03)    | 0.03 (0.04)    | -0.02 (0.03)   |
| Thailand                                     |                |                |                |
| Intercept                                    | -0.43 (0.15)** | -0.43 (0.12)** | -0.07 (0.12)   |
| Externalizing Problems in Adolescence        | -0.03 (0.05)   | -0.01 (0.05)   | -0.77 (0.17)** |
| Internalizing Problems in Adolescence        | 0.11 (0.04)**  | 0.09 (0.05)    | 0.41 (0.08)**  |
| Risk-taking Tendencies in Adolescence        | -0.16 (0.05)** | -0.03 (0.04)   | -0.04 (0.03)   |
| Well-being in Adolescence                    | 0.11 (0.04)**  | -0.08 (0.04)*  | -0.06 (0.03)*  |
| Confidence in Government's Pandemic Response | -0.07 (0.04)   | -0.11 (0.04)** | -0.04 (0.04)   |
| Male                                         | -0.2 (0.18)    | -0.27 (0.07)** | -0.1 (0.05)    |
| Parental Education                           | 0.06 (0.04)    | -0.01 (0.04)   | 0.07 (0.03)*   |
| Weeks since Schools Closed                   | -0.04 (0.06)   | 0.1 (0.07)     | 0.02 (0.06)    |
| Internalizing*Parental Education             | 0.01 (0.03)    | 0.03 (0.04)    | -0.02 (0.03)   |

|                                              |                    |                    |                    |
|----------------------------------------------|--------------------|--------------------|--------------------|
| United States                                |                    |                    |                    |
| Intercept                                    | 0.42 (0.1)**       | 0.1 (0.1)          | 0.26 (0.11)*       |
| Externalizing Problems in Adolescence        | -0.03 (0.05)       | -0.01 (0.05)       | 0.01 (0.05)        |
| Internalizing Problems in Adolescence        | 0.11 (0.04)**      | 0.09 (0.05)        | -0.06 (0.04)       |
| Risk-taking Tendencies in Adolescence        | 0.25 (0.1)**       | -0.03 (0.04)       | -0.04 (0.03)       |
| Well-being in Adolescence                    | -0.27 (0.08)**     | -0.29 (0.08)**     | -0.06 (0.03)*      |
| Confidence in Government's Pandemic Response | -0.07 (0.04)       | -0.11 (0.04)**     | -0.04 (0.04)       |
| Male                                         | -0.66 (0.08)**     | -0.27 (0.07)**     | -0.1 (0.05)        |
| Parental Education                           | 0.06 (0.04)        | 0.29 (0.09)**      | 0.07 (0.03)*       |
| Weeks since Schools Closed                   | -0.04 (0.06)       | 0.1 (0.07)         | 0.02 (0.06)        |
| Internalizing*Parental Education             | 0.01 (0.03)        | 0.03 (0.04)        | -0.02 (0.03)       |
| Model Fit Statistics                         |                    |                    |                    |
| Chi Square (DOF), p-value                    | 66.79 (63), p=0.35 | 69.78 (68), p=0.42 | 67.07 (67), p=0.47 |
| RMSEA                                        | 0.02               | 0.01               | 0                  |
| CFI                                          | 0.97               | 0.98               | 1                  |
| SRMR                                         | 0.03               | 0.033              | 0.032              |

b=standardized coefficient. \* $p < .05$ , \*\* $p < .01$ .

Supplemental Table 5: Full Information Maximum Likelihood Multiple Group Path Analyses Estimating Moderation of Relations between Pre-Pandemic Adolescent Externalizing Problems and Maladaptive Behavior during the Pandemic by Confidence in Government's Response

|                                              | Increase in<br>Internalizing<br>Problems | Increase in<br>Externalizing<br>Problems | Change in<br>Substance Use |
|----------------------------------------------|------------------------------------------|------------------------------------------|----------------------------|
|                                              | b (SE)                                   | b (SE)                                   | b (SE)                     |
| <b>China</b>                                 |                                          |                                          |                            |
| Intercept                                    | 0.17 (0.16)                              | -0.11 (0.18)                             | 0.28 (0.13)*               |
| Externalizing Problems in Adolescence        | -0.03 (0.05)                             | -0.01 (0.05)                             | 0.02 (0.04)                |
| Internalizing Problems in Adolescence        | 0.11 (0.04)*                             | 0.09 (0.05)                              | -0.05 (0.04)               |
| Risk-taking Tendencies in Adolescence        | -0.21 (0.05)**                           | -0.03 (0.04)                             | 0.09 (0.08)                |
| Well-being in Adolescence                    | 0.11 (0.04)**                            | -0.07 (0.04)                             | -0.06 (0.03)*              |
| Confidence in Government's Pandemic Response | -0.08 (0.04)*                            | -0.12 (0.04)**                           | -0.04 (0.04)               |
| Male                                         | -0.67 (0.08)**                           | -0.27 (0.07)**                           | -0.13 (0.06)*              |
| Parental Education                           | 0.06 (0.04)                              | 0.01 (0.04)                              | 0.05 (0.03)                |
| Weeks since Schools Closed                   | -0.04 (0.06)                             | 0.09 (0.07)                              | 0.02 (0.06)                |
| Externalizing*Government Confidence          | 0.02 (0.03)                              | -0.01 (0.03)                             | -0.07 (0.05)               |
| <b>Colombia</b>                              |                                          |                                          |                            |
| Intercept                                    | 0.35 (0.14)**                            | 0.17 (0.12)                              | 0.23 (0.12)                |
| Externalizing Problems in Adolescence        | -0.03 (0.05)                             | -0.01 (0.05)                             | 0.02 (0.04)                |
| Internalizing Problems in Adolescence        | 0.11 (0.04)*                             | 0.09 (0.05)                              | -0.05 (0.04)               |
| Risk-taking Tendencies in Adolescence        | 0.06 (0.14)                              | -0.03 (0.04)                             | -0.03 (0.04)               |
| Well-being in Adolescence                    | 0.11 (0.04)**                            | -0.07 (0.04)                             | -0.06 (0.03)*              |
| Confidence in Government's Pandemic Response | -0.08 (0.04)*                            | -0.12 (0.04)**                           | -0.04 (0.04)               |
| Male                                         | -0.67 (0.08)**                           | -0.27 (0.07)**                           | -0.13 (0.06)*              |
| Parental Education                           | 0.06 (0.04)                              | 0.01 (0.04)                              | 0.05 (0.03)                |
| Weeks since Schools Closed                   | -0.04 (0.06)                             | 0.09 (0.07)                              | 0.02 (0.06)                |
| Externalizing*Government Confidence          | 0.02 (0.03)                              | -0.01 (0.03)                             | 0.21 (0.21)                |
| <b>Italy</b>                                 |                                          |                                          |                            |
| Intercept                                    | 0.14 (0.08)                              | 0.27 (0.09)**                            | -0.15 (0.08)               |
| Externalizing Problems in Adolescence        | -0.03 (0.05)                             | -0.01 (0.05)                             | -0.3 (0.13)*               |
| Internalizing Problems in Adolescence        | 0.11 (0.04)*                             | 0.09 (0.05)                              | 0.26 (0.13)*               |
| Risk-taking Tendencies in Adolescence        | 0.04 (0.08)                              | -0.03 (0.04)                             | -0.03 (0.04)               |
| Well-being in Adolescence                    | -0.21 (0.07)**                           | -0.07 (0.04)                             | -0.06 (0.03)*              |
| Confidence in Government's Pandemic Response | -0.08 (0.04)*                            | -0.12 (0.04)**                           | -0.04 (0.04)               |
| Male                                         | -0.67 (0.08)**                           | -0.27 (0.07)**                           | -0.13 (0.06)*              |
| Parental Education                           | 0.06 (0.04)                              | 0.01 (0.04)                              | 0.05 (0.03)                |
| Weeks since Schools Closed                   | -0.04 (0.06)                             | 0.09 (0.07)                              | 0.02 (0.06)                |
| Externalizing*Government Confidence          | 0.02 (0.03)                              | -0.01 (0.03)                             | -0.07 (0.05)               |
| <b>Jordan</b>                                |                                          |                                          |                            |
| Intercept                                    | -0.04 (0.16)                             | 0.32 (0.12)**                            | 0.3 (0.07)**               |
| Externalizing Problems in Adolescence        | -0.03 (0.05)                             | -0.01 (0.05)                             | 0.02 (0.04)                |
| Internalizing Problems in Adolescence        | 0.11 (0.04)*                             | 0.09 (0.05)                              | -0.05 (0.04)               |
| Risk-taking Tendencies in Adolescence        | -0.21 (0.05)**                           | -0.03 (0.04)                             | -0.03 (0.04)               |
| Well-being in Adolescence                    | 0.11 (0.04)**                            | -0.07 (0.04)                             | -0.06 (0.03)*              |
| Confidence in Government's Pandemic Response | -0.08 (0.04)*                            | -0.12 (0.04)**                           | -0.04 (0.04)               |

|                                              |                |                |                |
|----------------------------------------------|----------------|----------------|----------------|
| Male                                         | -0.11 (0.19)   | -0.27 (0.07)** | -0.13 (0.06)*  |
| Parental Education                           | 0.06 (0.04)    | 0.01 (0.04)    | 0.05 (0.03)    |
| Weeks since Schools Closed                   | 0.69 (0.23)**  | 0.09 (0.07)    | 0.02 (0.06)    |
| Externalizing*Government Confidence          | 0.02 (0.03)    | -0.01 (0.03)   | -0.07 (0.05)   |
| Kenya                                        |                |                |                |
| Intercept                                    | -7.31 (3.56)*  | -0.22 (0.16)   | -0.14 (0.18)   |
| Externalizing Problems in Adolescence        | -0.03 (0.05)   | -0.01 (0.05)   | 0.02 (0.04)    |
| Internalizing Problems in Adolescence        | 0.11 (0.04)*   | 0.09 (0.05)    | -0.05 (0.04)   |
| Risk-taking Tendencies in Adolescence        | -0.21 (0.05)** | -0.03 (0.04)   | -0.03 (0.04)   |
| Well-being in Adolescence                    | 0.11 (0.04)**  | -0.07 (0.04)   | -0.06 (0.03)*  |
| Confidence in Government's Pandemic Response | -0.08 (0.04)*  | -0.12 (0.04)** | -0.04 (0.04)   |
| Male                                         | -0.03 (0.21)   | -0.27 (0.07)** | -0.13 (0.06)*  |
| Parental Education                           | 0.06 (0.04)    | 0.01 (0.04)    | 0.05 (0.03)    |
| Weeks since Schools Closed                   | 4.5 (2.22)*    | 0.09 (0.07)    | 0.02 (0.06)    |
| Externalizing*Government Confidence          | 0.02 (0.03)    | -0.01 (0.03)   | -0.07 (0.05)   |
| Philippines                                  |                |                |                |
| Intercept                                    | 0.75 (0.12)**  | -1.11 (0.48)*  | -0.67 (0.18)** |
| Externalizing Problems in Adolescence        | -0.03 (0.05)   | -0.01 (0.05)   | 0.02 (0.04)    |
| Internalizing Problems in Adolescence        | 0.11 (0.04)*   | 0.09 (0.05)    | -0.05 (0.04)   |
| Risk-taking Tendencies in Adolescence        | -0.21 (0.05)** | -0.03 (0.04)   | -0.03 (0.04)   |
| Well-being in Adolescence                    | 0.11 (0.04)**  | -0.07 (0.04)   | -0.06 (0.03)*  |
| Confidence in Government's Pandemic Response | -0.08 (0.04)*  | -0.38 (0.08)** | -0.04 (0.04)   |
| Male                                         | -0.67 (0.08)** | -0.27 (0.07)** | -0.13 (0.06)*  |
| Parental Education                           | 0.06 (0.04)    | 0.01 (0.04)    | 0.05 (0.03)    |
| Weeks since Schools Closed                   | -0.04 (0.06)   | -1.53 (0.64)*  | 0.02 (0.06)    |
| Externalizing*Government Confidence          | 0.02 (0.03)    | -0.01 (0.03)   | -0.07 (0.05)   |
| Sweden                                       |                |                |                |
| Intercept                                    | 0.15 (0.13)    | 0.23 (0.13)    | 0.03 (0.1)     |
| Externalizing Problems in Adolescence        | -0.03 (0.05)   | -0.01 (0.05)   | 0.02 (0.04)    |
| Internalizing Problems in Adolescence        | 0.11 (0.04)*   | 0.09 (0.05)    | -0.05 (0.04)   |
| Risk-taking Tendencies in Adolescence        | 0.22 (0.15)    | -0.03 (0.04)   | -0.03 (0.04)   |
| Well-being in Adolescence                    | 0.11 (0.04)**  | -0.07 (0.04)   | -0.06 (0.03)*  |
| Confidence in Government's Pandemic Response | -0.08 (0.04)*  | -0.12 (0.04)** | -0.04 (0.04)   |
| Male                                         | -0.67 (0.08)** | -0.27 (0.07)** | 0.14 (0.13)    |
| Parental Education                           | 0.06 (0.04)    | 0.01 (0.04)    | 0.05 (0.03)    |
| Weeks since Schools Closed                   | -0.04 (0.06)   | 0.09 (0.07)    | 0.02 (0.06)    |
| Externalizing*Government Confidence          | 0.02 (0.03)    | -0.01 (0.03)   | -0.07 (0.05)   |
| Thailand                                     |                |                |                |
| Intercept                                    | -0.42 (0.15)** | 1.54 (0.68)*   | -0.06 (0.12)   |
| Externalizing Problems in Adolescence        | -0.03 (0.05)   | -0.01 (0.05)   | -0.82 (0.18)** |
| Internalizing Problems in Adolescence        | 0.11 (0.04)*   | 0.09 (0.05)    | 0.41 (0.08)**  |
| Risk-taking Tendencies in Adolescence        | -0.21 (0.05)** | -0.03 (0.04)   | -0.03 (0.04)   |
| Well-being in Adolescence                    | 0.11 (0.04)**  | -0.07 (0.04)   | -0.06 (0.03)*  |
| Confidence in Government's Pandemic Response | -0.08 (0.04)*  | -0.12 (0.04)** | -0.04 (0.04)   |
| Male                                         | -0.22 (0.18)   | -0.27 (0.07)** | -0.13 (0.06)*  |
| Parental Education                           | 0.06 (0.04)    | 0.01 (0.04)    | 0.05 (0.03)    |
| Weeks since Schools Closed                   | -0.04 (0.06)   | 2.01 (0.65)**  | 0.02 (0.06)    |
| Externalizing*Government Confidence          | 0.02 (0.03)    | -0.01 (0.03)   | -0.07 (0.05)   |

|                                              |                    |                    |                    |
|----------------------------------------------|--------------------|--------------------|--------------------|
| United States                                |                    |                    |                    |
| Intercept                                    | 0.42 (0.1)**       | 0.09 (0.1)         | 0.23 (0.11)*       |
| Externalizing Problems in Adolescence        | -0.03 (0.05)       | -0.01 (0.05)       | 0.02 (0.04)        |
| Internalizing Problems in Adolescence        | 0.11 (0.04)*       | 0.09 (0.05)        | -0.05 (0.04)       |
| Risk-taking Tendencies in Adolescence        | 0.25 (0.1)*        | -0.03 (0.04)       | -0.03 (0.04)       |
| Well-being in Adolescence                    | -0.27 (0.08)**     | -0.29 (0.08)**     | -0.06 (0.03)*      |
| Confidence in Government's Pandemic Response | -0.08 (0.04)*      | -0.12 (0.04)**     | -0.04 (0.04)       |
| Male                                         | -0.67 (0.08)**     | -0.27 (0.07)**     | -0.13 (0.06)*      |
| Parental Education                           | 0.06 (0.04)        | 0.29 (0.09)**      | 0.24 (0.1)*        |
| Weeks since Schools Closed                   | -0.04 (0.06)       | 0.09 (0.07)        | 0.02 (0.06)        |
| Externalizing*Government Confidence          | 0.02 (0.03)        | -0.01 (0.03)       | -0.07 (0.05)       |
| Model Fit Statistics                         |                    |                    |                    |
| Chi Square (DOF), p-value                    | 68.31 (61), p=0.24 | 70.47 (67), p=0.36 | 67.71 (64), p=0.35 |
| RMSEA                                        | 0.03               | 0.02               | 0.02               |
| CFI                                          | 0.95               | 0.96               | 0.94               |
| SRMR                                         | 0.03               | 0.03               | 0.03               |

b=standardized coefficient. \* $p < .05$ , \*\* $p < .01$ .

Supplemental Table 6: Full Information Maximum Likelihood Multiple Group Path Analyses Estimating Moderation of Relations between Pre-Pandemic Adolescent Externalizing Problems and Maladaptive Behavior during the Pandemic by Gender

|                                              | Increase in<br>Internalizing<br>Problems | Increase in<br>Externalizing<br>Problems | Change in<br>Substance Use |
|----------------------------------------------|------------------------------------------|------------------------------------------|----------------------------|
|                                              | b (SE)                                   | b (SE)                                   | b (SE)                     |
| <b>China</b>                                 |                                          |                                          |                            |
| Intercept                                    | 0.17 (0.16)                              | -0.1 (0.18)                              | 0.27 (0.14)*               |
| Externalizing Problems in Adolescence        | 0.02 (0.06)                              | 0.03 (0.06)                              | -0.01 (0.08)               |
| Internalizing Problems in Adolescence        | 0.1 (0.04)*                              | 0.09 (0.05)                              | -0.05 (0.04)               |
| Risk-taking Tendencies in Adolescence        | -0.09 (0.04)*                            | -0.02 (0.04)                             | 0.09 (0.08)                |
| Well-being in Adolescence                    | 0.12 (0.04)**                            | -0.07 (0.04)                             | -0.06 (0.03)*              |
| Confidence in Government's Pandemic Response | -0.06 (0.04)                             | -0.12 (0.04)**                           | -0.03 (0.04)               |
| Male                                         | -0.66 (0.08)**                           | -0.28 (0.07)**                           | -0.12 (0.06)*              |
| Parental Education                           | 0.06 (0.04)                              | 0.01 (0.04)                              | 0.05 (0.03)                |
| Weeks since Schools Closed                   | -0.04 (0.06)                             | 0.08 (0.07)                              | 0.02 (0.07)                |
| Externalizing*Male                           | -0.08 (0.07)                             | -0.08 (0.07)                             | 0.04 (0.07)                |
| <b>Colombia</b>                              |                                          |                                          |                            |
| Intercept                                    | 0.37 (0.13)**                            | 0.16 (0.12)                              | 0.25 (0.12)*               |
| Externalizing Problems in Adolescence        | 0.02 (0.06)                              | 0.03 (0.06)                              | -0.01 (0.08)               |
| Internalizing Problems in Adolescence        | 0.1 (0.04)*                              | 0.09 (0.05)                              | -0.05 (0.04)               |
| Risk-taking Tendencies in Adolescence        | -0.09 (0.04)*                            | -0.02 (0.04)                             | -0.04 (0.03)               |
| Well-being in Adolescence                    | 0.12 (0.04)**                            | -0.07 (0.04)                             | -0.06 (0.03)*              |
| Confidence in Government's Pandemic Response | -0.06 (0.04)                             | -0.12 (0.04)**                           | -0.03 (0.04)               |
| Male                                         | -0.66 (0.08)**                           | -0.28 (0.07)**                           | -0.12 (0.06)*              |
| Parental Education                           | 0.06 (0.04)                              | 0.01 (0.04)                              | 0.05 (0.03)                |
| Weeks since Schools Closed                   | -0.04 (0.06)                             | 0.08 (0.07)                              | 0.02 (0.07)                |
| Externalizing*Male                           | -0.08 (0.07)                             | -0.08 (0.07)                             | 0.04 (0.07)                |
| <b>Italy</b>                                 |                                          |                                          |                            |
| Intercept                                    | 0.18 (0.08)*                             | 0.28 (0.09)**                            | -0.14 (0.08)               |
| Externalizing Problems in Adolescence        | 0.02 (0.06)                              | 0.03 (0.06)                              | -0.27 (0.13)*              |
| Internalizing Problems in Adolescence        | 0.1 (0.04)*                              | 0.09 (0.05)                              | 0.26 (0.13)*               |
| Risk-taking Tendencies in Adolescence        | -0.09 (0.04)*                            | -0.02 (0.04)                             | -0.04 (0.03)               |
| Well-being in Adolescence                    | -0.2 (0.07)**                            | -0.07 (0.04)                             | -0.06 (0.03)*              |
| Confidence in Government's Pandemic Response | -0.06 (0.04)                             | -0.12 (0.04)**                           | -0.03 (0.04)               |
| Male                                         | -0.66 (0.08)**                           | -0.28 (0.07)**                           | -0.12 (0.06)*              |
| Parental Education                           | 0.06 (0.04)                              | 0.01 (0.04)                              | 0.05 (0.03)                |
| Weeks since Schools Closed                   | -0.04 (0.06)                             | 0.08 (0.07)                              | 0.02 (0.07)                |
| Externalizing*Male                           | -0.08 (0.07)                             | -0.08 (0.07)                             | 0.04 (0.07)                |
| <b>Jordan</b>                                |                                          |                                          |                            |
| Intercept                                    | 0.11 (0.15)                              | 0.33 (0.12)**                            | 0.26 (0.07)**              |
| Externalizing Problems in Adolescence        | 0.02 (0.06)                              | 0.03 (0.06)                              | -0.01 (0.08)               |
| Internalizing Problems in Adolescence        | 0.1 (0.04)*                              | 0.09 (0.05)                              | -0.05 (0.04)               |
| Risk-taking Tendencies in Adolescence        | -0.09 (0.04)*                            | -0.02 (0.04)                             | -0.04 (0.03)               |
| Well-being in Adolescence                    | 0.12 (0.04)**                            | -0.07 (0.04)                             | -0.06 (0.03)*              |
| Confidence in Government's Pandemic Response | -0.06 (0.04)                             | -0.12 (0.04)**                           | -0.03 (0.04)               |



|                                              |                |                |                |
|----------------------------------------------|----------------|----------------|----------------|
| Male                                         | -0.16 (0.2)    | -0.28 (0.07)** | -0.12 (0.06)*  |
| Parental Education                           | 0.06 (0.04)    | 0.01 (0.04)    | 0.05 (0.03)    |
| Weeks since Schools Closed                   | 0.67 (0.23)**  | 0.08 (0.07)    | 0.02 (0.07)    |
| Externalizing*Male                           | -0.08 (0.07)   | -0.08 (0.07)   | 0.04 (0.07)    |
| Kenya                                        |                |                |                |
| Intercept                                    | 0.05 (0.18)    | -0.2 (0.16)    | -0.14 (0.18)   |
| Externalizing Problems in Adolescence        | 0.02 (0.06)    | 0.03 (0.06)    | -0.01 (0.08)   |
| Internalizing Problems in Adolescence        | 0.1 (0.04)*    | 0.09 (0.05)    | -0.05 (0.04)   |
| Risk-taking Tendencies in Adolescence        | -0.09 (0.04)*  | -0.02 (0.04)   | -0.04 (0.03)   |
| Well-being in Adolescence                    | 0.12 (0.04)**  | -0.07 (0.04)   | -0.06 (0.03)*  |
| Confidence in Government's Pandemic Response | -0.06 (0.04)   | -0.12 (0.04)** | -0.03 (0.04)   |
| Male                                         | -0.04 (0.22)   | -0.28 (0.07)** | -0.12 (0.06)*  |
| Parental Education                           | 0.06 (0.04)    | 0.01 (0.04)    | 0.05 (0.03)    |
| Weeks since Schools Closed                   | -0.04 (0.06)   | 0.08 (0.07)    | 0.02 (0.07)    |
| Externalizing*Male                           | -0.08 (0.07)   | -0.08 (0.07)   | 0.04 (0.07)    |
| Philippines                                  |                |                |                |
| Intercept                                    | 0.74 (0.12)**  | 0.1 (0.12)     | -0.67 (0.18)** |
| Externalizing Problems in Adolescence        | 0.02 (0.06)    | 0.03 (0.06)    | -0.01 (0.08)   |
| Internalizing Problems in Adolescence        | 0.1 (0.04)*    | 0.09 (0.05)    | -0.05 (0.04)   |
| Risk-taking Tendencies in Adolescence        | -0.09 (0.04)*  | -0.02 (0.04)   | -0.04 (0.03)   |
| Well-being in Adolescence                    | 0.12 (0.04)**  | -0.07 (0.04)   | -0.06 (0.03)*  |
| Confidence in Government's Pandemic Response | -0.06 (0.04)   | -0.36 (0.08)** | -0.03 (0.04)   |
| Male                                         | -0.66 (0.08)** | -0.28 (0.07)** | -0.12 (0.06)*  |
| Parental Education                           | 0.06 (0.04)    | 0.01 (0.04)    | 0.05 (0.03)    |
| Weeks since Schools Closed                   | -0.04 (0.06)   | 0.08 (0.07)    | 0.02 (0.07)    |
| Externalizing*Male                           | -0.08 (0.07)   | -0.08 (0.07)   | 0.04 (0.07)    |
| Sweden                                       |                |                |                |
| Intercept                                    | 0.38 (0.15)*   | 0.23 (0.13)    | 0.06 (0.09)    |
| Externalizing Problems in Adolescence        | 0.02 (0.06)    | 0.03 (0.06)    | -0.01 (0.08)   |
| Internalizing Problems in Adolescence        | 0.43 (0.15)**  | 0.09 (0.05)    | -0.05 (0.04)   |
| Risk-taking Tendencies in Adolescence        | -0.09 (0.04)*  | -0.02 (0.04)   | -0.04 (0.03)   |
| Well-being in Adolescence                    | 0.12 (0.04)**  | -0.07 (0.04)   | -0.06 (0.03)*  |
| Confidence in Government's Pandemic Response | -0.06 (0.04)   | -0.12 (0.04)** | -0.03 (0.04)   |
| Male                                         | -0.66 (0.08)** | -0.28 (0.07)** | -0.12 (0.06)*  |
| Parental Education                           | 0.06 (0.04)    | 0.01 (0.04)    | 0.05 (0.03)    |
| Weeks since Schools Closed                   | -0.04 (0.06)   | 0.08 (0.07)    | 0.02 (0.07)    |
| Externalizing*Male                           | -0.08 (0.07)   | -0.08 (0.07)   | -0.26 (0.14)   |
| Thailand                                     |                |                |                |
| Intercept                                    | -0.43 (0.15)** | 1.52 (0.68)*   | -0.05 (0.12)   |
| Externalizing Problems in Adolescence        | 0.02 (0.06)    | 0.03 (0.06)    | -0.78 (0.17)** |
| Internalizing Problems in Adolescence        | 0.1 (0.04)*    | 0.09 (0.05)    | 0.41 (0.08)**  |
| Risk-taking Tendencies in Adolescence        | -0.09 (0.04)*  | -0.02 (0.04)   | -0.04 (0.03)   |
| Well-being in Adolescence                    | 0.12 (0.04)**  | -0.07 (0.04)   | -0.06 (0.03)*  |
| Confidence in Government's Pandemic Response | -0.06 (0.04)   | -0.12 (0.04)** | -0.03 (0.04)   |
| Male                                         | -0.2 (0.18)    | -0.28 (0.07)** | -0.12 (0.06)*  |
| Parental Education                           | 0.06 (0.04)    | 0.01 (0.04)    | 0.05 (0.03)    |
| Weeks since Schools Closed                   | -0.04 (0.06)   | 1.98 (0.65)**  | 0.02 (0.07)    |
| Externalizing*Male                           | -0.08 (0.07)   | -0.08 (0.07)   | 0.04 (0.07)    |

|                                              |                    |                    |                  |
|----------------------------------------------|--------------------|--------------------|------------------|
| United States                                |                    |                    |                  |
| Intercept                                    | 0.42 (0.09)**      | 0.08 (0.1)         | 0.24 (0.11)*     |
| Externalizing Problems in Adolescence        | 0.02 (0.06)        | 0.03 (0.06)        | -0.01 (0.08)     |
| Internalizing Problems in Adolescence        | 0.1 (0.04)*        | 0.09 (0.05)        | -0.05 (0.04)     |
| Risk-taking Tendencies in Adolescence        | 0.25 (0.1)**       | -0.02 (0.04)       | -0.04 (0.03)     |
| Well-being in Adolescence                    | -0.28 (0.08)**     | -0.3 (0.08)**      | -0.06 (0.03)*    |
| Confidence in Government's Pandemic Response | -0.06 (0.04)       | -0.12 (0.04)**     | -0.03 (0.04)     |
| Male                                         | -0.66 (0.08)**     | -0.28 (0.07)**     | -0.12 (0.06)*    |
| Parental Education                           | 0.06 (0.04)        | 0.29 (0.09)**      | 0.23 (0.1)*      |
| Weeks since Schools Closed                   | -0.04 (0.06)       | 0.08 (0.07)        | 0.02 (0.07)      |
| Externalizing*Male                           | -0.08 (0.07)       | -0.08 (0.07)       | 0.04 (0.07)      |
| Model Fit Statistics                         |                    |                    |                  |
| Chi Square (DOF), p-value                    | 70.73 (64), p=0.26 | 66.91 (68), p=0.51 | 67.3 (65), p=0.4 |
| RMSEA                                        | 0.03               | 0                  | 0.02             |
| CFI                                          | 0.95               | 1                  | 0.96             |
| SRMR                                         | 0.04               | 0.034              | 0.029            |

b=standardized coefficient. \* $p < .05$ , \*\* $p < .01$ .

Supplemental Table 7: Full Information Maximum Likelihood Multiple Group Path Analyses Estimating Moderation of Relations between Pre-Pandemic Adolescent Externalizing Problems and Maladaptive Behavior during the Pandemic by Parental Education

|                                              | Increase in<br>Internalizing<br>Problems | Increase in<br>Externalizing<br>Problems | Change in<br>Substance Use |
|----------------------------------------------|------------------------------------------|------------------------------------------|----------------------------|
|                                              | b (SE)                                   | b (SE)                                   | b (SE)                     |
| <b>China</b>                                 |                                          |                                          |                            |
| Intercept                                    | 0.16 (0.16)                              | -0.12 (0.18)                             | 0.32 (0.14)*               |
| Externalizing Problems in Adolescence        | -0.03 (0.05)                             | 0 (0.05)                                 | 0.01 (0.05)                |
| Internalizing Problems in Adolescence        | 0.11 (0.04)*                             | 0.09 (0.05)                              | -0.06 (0.04)               |
| Risk-taking Tendencies in Adolescence        | -0.11 (0.04)*                            | -0.03 (0.04)                             | 0 (0.03)                   |
| Well-being in Adolescence                    | 0.11 (0.04)**                            | -0.07 (0.04)                             | -0.06 (0.03)*              |
| Confidence in Government's Pandemic Response | -0.07 (0.04)                             | -0.12 (0.04)**                           | -0.03 (0.04)               |
| Male                                         | -0.64 (0.08)**                           | -0.27 (0.07)**                           | -0.09 (0.05)               |
| Parental Education                           | 0.05 (0.04)                              | 0.01 (0.04)                              | 0.11 (0.04)**              |
| Weeks since Schools Closed                   | -0.04 (0.06)                             | 0.09 (0.07)                              | -0.01 (0.06)               |
| Externalizing*Parental Education             | -0.09 (0.04)*                            | 0.05 (0.03)                              | 0.05 (0.04)                |
| <b>Colombia</b>                              |                                          |                                          |                            |
| Intercept                                    | 0.32 (0.13)*                             | 0.19 (0.12)                              | 0.18 (0.11)                |
| Externalizing Problems in Adolescence        | -0.03 (0.05)                             | 0 (0.05)                                 | 0.01 (0.05)                |
| Internalizing Problems in Adolescence        | 0.11 (0.04)*                             | 0.09 (0.05)                              | -0.06 (0.04)               |
| Risk-taking Tendencies in Adolescence        | -0.11 (0.04)*                            | -0.03 (0.04)                             | 0 (0.03)                   |
| Well-being in Adolescence                    | 0.11 (0.04)**                            | -0.07 (0.04)                             | -0.06 (0.03)*              |
| Confidence in Government's Pandemic Response | -0.07 (0.04)                             | -0.12 (0.04)**                           | -0.03 (0.04)               |
| Male                                         | -0.64 (0.08)**                           | -0.27 (0.07)**                           | -0.09 (0.05)               |
| Parental Education                           | 0.05 (0.04)                              | 0.01 (0.04)                              | 0.11 (0.04)**              |
| Weeks since Schools Closed                   | -0.04 (0.06)                             | 0.09 (0.07)                              | -0.01 (0.06)               |
| Externalizing*Parental Education             | -0.09 (0.04)*                            | 0.05 (0.03)                              | -0.15 (0.10)               |
| <b>Italy</b>                                 |                                          |                                          |                            |
| Intercept                                    | 0.19 (0.08)*                             | 0.29 (0.09)**                            | -0.16 (0.07)*              |
| Externalizing Problems in Adolescence        | -0.03 (0.05)                             | 0 (0.05)                                 | -0.25 (0.13)*              |
| Internalizing Problems in Adolescence        | 0.11 (0.04)*                             | 0.09 (0.05)                              | 0.24 (0.12)                |
| Risk-taking Tendencies in Adolescence        | -0.11 (0.04)*                            | -0.03 (0.04)                             | 0 (0.03)                   |
| Well-being in Adolescence                    | -0.21 (0.07)**                           | -0.07 (0.04)                             | -0.06 (0.03)*              |
| Confidence in Government's Pandemic Response | -0.07 (0.04)                             | -0.12 (0.04)**                           | -0.03 (0.04)               |
| Male                                         | -0.64 (0.08)**                           | -0.27 (0.07)**                           | -0.09 (0.05)               |
| Parental Education                           | 0.05 (0.04)                              | 0.01 (0.04)                              | -0.07 (0.07)               |
| Weeks since Schools Closed                   | -0.04 (0.06)                             | 0.09 (0.07)                              | -0.01 (0.06)               |
| Externalizing*Parental Education             | 0.06 (0.04)                              | 0.05 (0.03)                              | 0.05 (0.04)                |
| <b>Jordan</b>                                |                                          |                                          |                            |
| Intercept                                    | 0.1 (0.15)                               | 0.31 (0.12)**                            | 0.3 (0.07)**               |
| Externalizing Problems in Adolescence        | -0.03 (0.05)                             | 0 (0.05)                                 | 0.01 (0.05)                |
| Internalizing Problems in Adolescence        | 0.11 (0.04)*                             | 0.09 (0.05)                              | -0.06 (0.04)               |
| Risk-taking Tendencies in Adolescence        | -0.11 (0.04)*                            | -0.03 (0.04)                             | 0 (0.03)                   |
| Well-being in Adolescence                    | 0.11 (0.04)**                            | -0.07 (0.04)                             | -0.06 (0.03)*              |

|                                              |                |                |                |
|----------------------------------------------|----------------|----------------|----------------|
| Confidence in Government's Pandemic Response | -0.07 (0.04)   | -0.12 (0.04)** | -0.03 (0.04)   |
| Male                                         | -0.22 (0.19)   | -0.27 (0.07)** | -0.09 (0.05)   |
| Parental Education                           | 0.05 (0.04)    | 0.01 (0.04)    | 0.11 (0.04)**  |
| Weeks since Schools Closed                   | 0.68 (0.22)**  | 0.09 (0.07)    | -0.01 (0.06)   |
| Externalizing*Parental Education             | -0.09 (0.04)*  | 0.05 (0.03)    | 0.05 (0.04)    |
| Kenya                                        |                |                |                |
| Intercept                                    | 0.04 (0.18)    | -0.22 (0.16)   | -0.09 (0.18)   |
| Externalizing Problems in Adolescence        | -0.03 (0.05)   | 0 (0.05)       | 0.01 (0.05)    |
| Internalizing Problems in Adolescence        | 0.11 (0.04)*   | 0.09 (0.05)    | -0.06 (0.04)   |
| Risk-taking Tendencies in Adolescence        | -0.11 (0.04)*  | -0.03 (0.04)   | 0 (0.03)       |
| Well-being in Adolescence                    | 0.11 (0.04)**  | -0.07 (0.04)   | -0.06 (0.03)*  |
| Confidence in Government's Pandemic Response | -0.07 (0.04)   | -0.12 (0.04)** | -0.03 (0.04)   |
| Male                                         | 0.04 (0.21)    | -0.27 (0.07)** | -0.09 (0.05)   |
| Parental Education                           | 0.05 (0.04)    | 0.01 (0.04)    | 0.11 (0.04)**  |
| Weeks since Schools Closed                   | -0.04 (0.06)   | 0.09 (0.07)    | -0.01 (0.06)   |
| Externalizing*Parental Education             | -0.09 (0.04)*  | 0.05 (0.03)    | 0.05 (0.04)    |
| Philippines                                  |                |                |                |
| Intercept                                    | 0.75 (0.12)**  | -1.09 (0.48)*  | -0.73 (0.18)** |
| Externalizing Problems in Adolescence        | -0.03 (0.05)   | 0 (0.05)       | 0.01 (0.05)    |
| Internalizing Problems in Adolescence        | 0.11 (0.04)*   | 0.09 (0.05)    | -0.06 (0.04)   |
| Risk-taking Tendencies in Adolescence        | -0.11 (0.04)*  | -0.03 (0.04)   | 0 (0.03)       |
| Well-being in Adolescence                    | 0.11 (0.04)**  | -0.07 (0.04)   | -0.06 (0.03)*  |
| Confidence in Government's Pandemic Response | -0.07 (0.04)   | -0.38 (0.08)** | -0.03 (0.04)   |
| Male                                         | -0.64 (0.08)** | -0.27 (0.07)** | -0.09 (0.05)   |
| Parental Education                           | 0.05 (0.04)    | 0.01 (0.04)    | 0.11 (0.04)**  |
| Weeks since Schools Closed                   | -0.04 (0.06)   | -1.49 (0.64)*  | -0.01 (0.06)   |
| Externalizing*Parental Education             | -0.09 (0.04)*  | 0.05 (0.03)    | 0.05 (0.04)    |
| Sweden                                       |                |                |                |
| Intercept                                    | 0.1 (0.13)     | 0.26 (0.13)    | 0.06 (0.09)    |
| Externalizing Problems in Adolescence        | -0.03 (0.05)   | 0 (0.05)       | 0.01 (0.05)    |
| Internalizing Problems in Adolescence        | 0.11 (0.04)*   | 0.09 (0.05)    | -0.06 (0.04)   |
| Risk-taking Tendencies in Adolescence        | 0.24 (0.15)    | -0.03 (0.04)   | 0 (0.03)       |
| Well-being in Adolescence                    | 0.11 (0.04)**  | -0.07 (0.04)   | -0.06 (0.03)*  |
| Confidence in Government's Pandemic Response | -0.07 (0.04)   | -0.12 (0.04)** | -0.03 (0.04)   |
| Male                                         | -0.64 (0.08)** | -0.27 (0.07)** | -0.09 (0.05)   |
| Parental Education                           | 0.05 (0.04)    | 0.01 (0.04)    | 0.11 (0.04)**  |
| Weeks since Schools Closed                   | -0.04 (0.06)   | 0.09 (0.07)    | -0.01 (0.06)   |
| Externalizing*Parental Education             | -0.09 (0.04)*  | 0.05 (0.03)    | 0.05 (0.04)    |
| Thailand                                     |                |                |                |
| Intercept                                    | -0.43 (0.15)** | 1.39 (0.69)*   | -0.1 (0.12)    |
| Externalizing Problems in Adolescence        | -0.03 (0.05)   | 0 (0.05)       | -0.76 (0.18)** |
| Internalizing Problems in Adolescence        | 0.11 (0.04)*   | 0.09 (0.05)    | 0.41 (0.08)**  |
| Risk-taking Tendencies in Adolescence        | -0.11 (0.04)*  | -0.03 (0.04)   | 0 (0.03)       |
| Well-being in Adolescence                    | 0.11 (0.04)**  | -0.07 (0.04)   | -0.06 (0.03)*  |
| Confidence in Government's Pandemic Response | -0.07 (0.04)   | -0.12 (0.04)** | -0.03 (0.04)   |
| Male                                         | -0.2 (0.18)    | -0.27 (0.07)** | -0.09 (0.05)   |
| Parental Education                           | 0.05 (0.04)    | 0.01 (0.04)    | 0.11 (0.04)**  |
| Weeks since Schools Closed                   | -0.04 (0.06)   | 1.86 (0.66)**  | -0.01 (0.06)   |

|                                              |                    |                    |                    |
|----------------------------------------------|--------------------|--------------------|--------------------|
| Externalizing*Parental Education             | -0.09 (0.04)*      | 0.05 (0.03)        | 0.05 (0.04)        |
| United States                                |                    |                    |                    |
| Intercept                                    | 0.41 (0.1)**       | 0.1 (0.1)          | 0.24 (0.11)*       |
| Externalizing Problems in Adolescence        | -0.03 (0.05)       | 0 (0.05)           | 0.01 (0.05)        |
| Internalizing Problems in Adolescence        | 0.11 (0.04)*       | 0.09 (0.05)        | -0.06 (0.04)       |
| Risk-taking Tendencies in Adolescence        | 0.25 (0.1)*        | -0.03 (0.04)       | 0 (0.03)           |
| Well-being in Adolescence                    | -0.28 (0.08)**     | -0.29 (0.07)**     | -0.06 (0.03)*      |
| Confidence in Government's Pandemic Response | -0.07 (0.04)       | -0.12 (0.04)**     | -0.03 (0.04)       |
| Male                                         | -0.64 (0.08)**     | -0.27 (0.07)**     | -0.09 (0.05)       |
| Parental Education                           | 0.05 (0.04)        | 0.3 (0.09)**       | 0.11 (0.04)**      |
| Weeks since Schools Closed                   | -0.04 (0.06)       | 0.09 (0.07)        | -0.01 (0.06)       |
| Externalizing*Parental Education             | -0.09 (0.04)*      | 0.05 (0.03)        | 0.05 (0.04)        |
| Model Fit Statistics                         |                    |                    |                    |
| Chi Square (DOF), p-value                    | 66.98 (63), p=0.34 | 69.18 (67), p=0.40 | 66.16 (66), p=0.47 |
| RMSEA                                        | 0.02               | 0.02               | 0                  |
| CFI                                          | 0.97               | 0.97               | 1                  |
| SRMR                                         | 0.03               | 0.032              | 0.032              |

b=standardized coefficient. \* $p < .05$ , \*\* $p < .01$ .

Supplemental Table 8: Full Information Maximum Likelihood Multiple Group Path Analyses Estimating Moderation of Relations between Pre-Pandemic Adolescent Risk-taking Tendencies and Maladaptive Behavior during the Pandemic by Confidence in Government's Response

|                                              | Increase in<br>Internalizing<br>Problems | Increase in<br>Externalizing<br>Problems | Change in Substance<br>Use |
|----------------------------------------------|------------------------------------------|------------------------------------------|----------------------------|
|                                              | b (SE)                                   | b (SE)                                   | b (SE)                     |
| <b>China</b>                                 |                                          |                                          |                            |
| Intercept                                    | 0.2 (0.16)                               | -0.1 (0.18)                              | 0.15 (0.15)                |
| Externalizing Problems in Adolescence        | 0.02 (0.05)                              | -0.01 (0.05)                             | 0 (0.05)                   |
| Internalizing Problems in Adolescence        | 0.12 (0.04)**                            | 0.09 (0.05)                              | -0.06 (0.04)               |
| Risk-taking Tendencies in Adolescence        | -0.15 (0.05)**                           | -0.04 (0.04)                             | 0.38 (0.37)                |
| Well-being in Adolescence                    | 0.11 (0.04)**                            | -0.07 (0.04)                             | -0.06 (0.03)*              |
| Confidence in Government's Pandemic Response | -0.11 (0.04)**                           | -0.13 (0.04)**                           | 0.08 (0.08)                |
| Male                                         | -0.66 (0.08)**                           | -0.27 (0.07)**                           | -0.11 (0.05)*              |
| Parental Education                           | 0.05 (0.04)                              | 0.01 (0.04)                              | 0.05 (0.03)                |
| Weeks since Schools Closed                   | -0.04 (0.06)                             | 0.08 (0.07)                              | 0.03 (0.06)                |
| Risk-taking*Government Confidence            | 0.01 (0.04)                              | -0.03 (0.03)                             | -0.25 (0.26)               |
| <b>Colombia</b>                              |                                          |                                          |                            |
| Intercept                                    | 0.35 (0.13)**                            | 0.17 (0.12)                              | 0.24 (0.12)                |
| Externalizing Problems in Adolescence        | 0.02 (0.05)                              | -0.01 (0.05)                             | 0 (0.05)                   |
| Internalizing Problems in Adolescence        | 0.12 (0.04)**                            | 0.09 (0.05)                              | -0.06 (0.04)               |
| Risk-taking Tendencies in Adolescence        | -0.15 (0.05)**                           | -0.04 (0.04)                             | -0.05 (0.03)               |
| Well-being in Adolescence                    | 0.11 (0.04)**                            | -0.07 (0.04)                             | -0.06 (0.03)*              |
| Confidence in Government's Pandemic Response | -0.11 (0.04)**                           | -0.13 (0.04)**                           | -0.05 (0.04)               |
| Male                                         | -0.66 (0.08)**                           | -0.27 (0.07)**                           | -0.11 (0.05)*              |
| Parental Education                           | 0.05 (0.04)                              | 0.01 (0.04)                              | 0.05 (0.03)                |
| Weeks since Schools Closed                   | -0.04 (0.06)                             | 0.08 (0.07)                              | 0.03 (0.06)                |
| Risk-taking*Government Confidence            | 0.01 (0.04)                              | -0.03 (0.03)                             | 0.02 (0.04)                |
| <b>Italy</b>                                 |                                          |                                          |                            |
| Intercept                                    | 0.16 (0.08)                              | 0.28 (0.09)**                            | -0.14 (0.08)               |
| Externalizing Problems in Adolescence        | -0.16 (0.08)                             | -0.01 (0.05)                             | -0.26 (0.13)*              |
| Internalizing Problems in Adolescence        | 0.12 (0.04)**                            | 0.09 (0.05)                              | 0.25 (0.13)*               |
| Risk-taking Tendencies in Adolescence        | 0.04 (0.08)                              | -0.04 (0.04)                             | -0.05 (0.03)               |
| Well-being in Adolescence                    | -0.22 (0.07)**                           | -0.07 (0.04)                             | -0.06 (0.03)*              |
| Confidence in Government's Pandemic Response | -0.11 (0.04)**                           | -0.13 (0.04)**                           | -0.05 (0.04)               |
| Male                                         | -0.66 (0.08)**                           | -0.27 (0.07)**                           | -0.11 (0.05)*              |
| Parental Education                           | 0.05 (0.04)                              | 0.01 (0.04)                              | 0.05 (0.03)                |
| Weeks since Schools Closed                   | -0.04 (0.06)                             | 0.08 (0.07)                              | 0.03 (0.06)                |
| Risk-taking*Government Confidence            | 0.01 (0.04)                              | -0.03 (0.03)                             | 0.02 (0.04)                |
| <b>Jordan</b>                                |                                          |                                          |                            |
| Intercept                                    | -0.15 (0.17)                             | 0.28 (0.12)*                             | 0.3 (0.07)**               |
| Externalizing Problems in Adolescence        | 0.02 (0.05)                              | -0.01 (0.05)                             | 0 (0.05)                   |
| Internalizing Problems in Adolescence        | 0.12 (0.04)**                            | 0.09 (0.05)                              | -0.06 (0.04)               |
| Risk-taking Tendencies in Adolescence        | -0.15 (0.05)**                           | -0.04 (0.04)                             | -0.05 (0.03)               |
| Well-being in Adolescence                    | 0.11 (0.04)**                            | -0.07 (0.04)                             | -0.06 (0.03)*              |
| Confidence in Government's Pandemic Response | -0.11 (0.04)**                           | -0.13 (0.04)**                           | -0.05 (0.04)               |

|                                              |                |                |                |
|----------------------------------------------|----------------|----------------|----------------|
| Male                                         | -0.07 (0.2)    | -0.27 (0.07)** | -0.11 (0.05)*  |
| Parental Education                           | 0.05 (0.04)    | 0.01 (0.04)    | 0.05 (0.03)    |
| Weeks since Schools Closed                   | 0.78 (0.22)**  | 0.08 (0.07)    | 0.03 (0.06)    |
| Risk-taking*Government Confidence            | -0.21 (0.08)*  | -0.03 (0.03)   | 0.02 (0.04)    |
| Kenya                                        |                |                |                |
| Intercept                                    | 0.06 (0.18)    | -0.2 (0.16)    | -0.16 (0.18)   |
| Externalizing Problems in Adolescence        | 0.02 (0.05)    | -0.01 (0.05)   | 0 (0.05)       |
| Internalizing Problems in Adolescence        | 0.12 (0.04)**  | 0.09 (0.05)    | -0.06 (0.04)   |
| Risk-taking Tendencies in Adolescence        | -0.15 (0.05)** | -0.04 (0.04)   | -0.05 (0.03)   |
| Well-being in Adolescence                    | 0.11 (0.04)**  | -0.07 (0.04)   | -0.06 (0.03)*  |
| Confidence in Government's Pandemic Response | -0.11 (0.04)** | -0.13 (0.04)** | -0.05 (0.04)   |
| Male                                         | 0.01 (0.2)     | -0.27 (0.07)** | -0.11 (0.05)*  |
| Parental Education                           | 0.05 (0.04)    | 0.01 (0.04)    | 0.05 (0.03)    |
| Weeks since Schools Closed                   | -0.04 (0.06)   | 0.08 (0.07)    | 0.03 (0.06)    |
| Risk-taking*Government Confidence            | 0.01 (0.04)    | -0.03 (0.03)   | 0.02 (0.04)    |
| Philippines                                  |                |                |                |
| Intercept                                    | 0.73 (0.12)**  | -1.11 (0.49)*  | -0.68 (0.18)** |
| Externalizing Problems in Adolescence        | 0.02 (0.05)    | -0.01 (0.05)   | 0 (0.05)       |
| Internalizing Problems in Adolescence        | 0.12 (0.04)**  | 0.09 (0.05)    | -0.06 (0.04)   |
| Risk-taking Tendencies in Adolescence        | -0.15 (0.05)** | -0.04 (0.04)   | -0.05 (0.03)   |
| Well-being in Adolescence                    | 0.11 (0.04)**  | -0.07 (0.04)   | -0.06 (0.03)*  |
| Confidence in Government's Pandemic Response | -0.11 (0.04)** | -0.38 (0.09)** | -0.05 (0.04)   |
| Male                                         | -0.66 (0.08)** | -0.27 (0.07)** | -0.11 (0.05)*  |
| Parental Education                           | 0.05 (0.04)    | 0.01 (0.04)    | 0.05 (0.03)    |
| Weeks since Schools Closed                   | -0.04 (0.06)   | -1.51 (0.65)*  | 0.03 (0.06)    |
| Risk-taking*Government Confidence            | 0.01 (0.04)    | -0.03 (0.03)   | 0.02 (0.04)    |
| Sweden                                       |                |                |                |
| Intercept                                    | 0.28 (0.13)*   | 0.22 (0.13)    | 0.14 (0.09)    |
| Externalizing Problems in Adolescence        | 0.02 (0.05)    | -0.01 (0.05)   | 0 (0.05)       |
| Internalizing Problems in Adolescence        | 0.12 (0.04)**  | 0.09 (0.05)    | -0.06 (0.04)   |
| Risk-taking Tendencies in Adolescence        | -0.15 (0.05)** | -0.04 (0.04)   | -0.05 (0.03)   |
| Well-being in Adolescence                    | 0.11 (0.04)**  | -0.07 (0.04)   | -0.06 (0.03)*  |
| Confidence in Government's Pandemic Response | -0.11 (0.04)** | -0.13 (0.04)** | -0.05 (0.04)   |
| Male                                         | -0.66 (0.08)** | -0.27 (0.07)** | -0.11 (0.05)*  |
| Parental Education                           | 0.05 (0.04)    | 0.01 (0.04)    | 0.05 (0.03)    |
| Weeks since Schools Closed                   | -0.04 (0.06)   | 0.08 (0.07)    | 0.03 (0.06)    |
| Risk-taking*Government Confidence            | 0.39 (0.16)*   | 0.39 (0.17)*   | 0.02 (0.04)    |
| Thailand                                     |                |                |                |
| Intercept                                    | -0.44 (0.15)** | 1.53 (0.68)*   | -0.05 (0.12)   |
| Externalizing Problems in Adolescence        | 0.02 (0.05)    | -0.01 (0.05)   | -0.77 (0.17)** |
| Internalizing Problems in Adolescence        | 0.12 (0.04)**  | 0.09 (0.05)    | 0.41 (0.08)**  |
| Risk-taking Tendencies in Adolescence        | -0.15 (0.05)** | -0.04 (0.04)   | -0.05 (0.03)   |
| Well-being in Adolescence                    | 0.11 (0.04)**  | -0.07 (0.04)   | -0.06 (0.03)*  |
| Confidence in Government's Pandemic Response | -0.11 (0.04)** | -0.13 (0.04)** | -0.05 (0.04)   |
| Male                                         | -0.19 (0.18)   | -0.27 (0.07)** | -0.11 (0.05)*  |
| Parental Education                           | 0.05 (0.04)    | 0.01 (0.04)    | 0.05 (0.03)    |
| Weeks since Schools Closed                   | -0.04 (0.06)   | 2.01 (0.65)**  | 0.03 (0.06)    |
| Risk-taking*Government Confidence            | 0.01 (0.04)    | -0.03 (0.03)   | 0.02 (0.04)    |

|                                              |                            |                           |                            |
|----------------------------------------------|----------------------------|---------------------------|----------------------------|
| United States                                |                            |                           |                            |
| Intercept                                    | 0.41 (0.1)**               | 0.09 (0.1)                | 0.23 (0.11)*               |
| Externalizing Problems in Adolescence        | 0.02 (0.05)                | -0.01 (0.05)              | 0 (0.05)                   |
| Internalizing Problems in Adolescence        | 0.12 (0.04)**              | 0.09 (0.05)               | -0.06 (0.04)               |
| Risk-taking Tendencies in Adolescence        | 0.27 (0.1)**               | -0.04 (0.04)              | -0.05 (0.03)               |
| Well-being in Adolescence                    | -0.27 (0.08)**             | -0.3 (0.08)**             | -0.06 (0.03)*              |
| Confidence in Government's Pandemic Response | -0.11 (0.04)**             | -0.13 (0.04)**            | -0.05 (0.04)               |
| Male                                         | -0.66 (0.08)**             | -0.27 (0.07)**            | -0.11 (0.05)*              |
| Parental Education                           | 0.05 (0.04)                | 0.29 (0.09)**             | 0.23 (0.09)*               |
| Weeks since Schools Closed                   | -0.04 (0.06)               | 0.08 (0.07)               | 0.03 (0.06)                |
| Risk-taking*Government Confidence            | 0.01 (0.04)                | -0.03 (0.03)              | 0.02 (0.04)                |
| Model Fit Statistics                         |                            |                           |                            |
| Chi Square (DOF), <i>p</i> -value            | 65.41 (61), <i>p</i> =0.33 | 70.7 (66), <i>p</i> =0.32 | 64.73 (64), <i>p</i> =0.45 |
| RMSEA                                        | 0.02                       | 0.02                      | 0.01                       |
| CFI                                          | 0.97                       | 0.95                      | 0.99                       |
| SRMR                                         | 0.03                       | 0.031                     | 0.03                       |

b=standardized coefficient. \**p* < .05, \*\**p* < .01.



Supplemental Table 9: Full Information Maximum Likelihood Multiple Group Path Analyses Estimating Moderation of Relations between Pre-Pandemic Adolescent Risk-taking Tendencies and Maladaptive Behavior during the Pandemic by Gender

|                                              | Increase in<br>Internalizing<br>Problems | Increase in<br>Externalizing<br>Problems | Change in<br>Substance Use |
|----------------------------------------------|------------------------------------------|------------------------------------------|----------------------------|
|                                              | b (SE)                                   | b (SE)                                   | b (SE)                     |
| <b>China</b>                                 |                                          |                                          |                            |
| Intercept                                    | 0.18 (0.16)                              | -0.06 (0.18)                             | 0.26 (0.13)*               |
| Externalizing Problems in Adolescence        | 0.01 (0.05)                              | -0.02 (0.05)                             | 0 (0.05)                   |
| Internalizing Problems in Adolescence        | 0.12 (0.04)**                            | 0.09 (0.05)                              | -0.06 (0.04)               |
| Risk-taking Tendencies in Adolescence        | -0.01 (0.06)                             | 0.07 (0.05)                              | -0.01 (0.03)               |
| Well-being in Adolescence                    | 0.11 (0.04)**                            | -0.07 (0.04)                             | -0.06 (0.03)*              |
| Confidence in Government's Pandemic Response | -0.08 (0.04)*                            | -0.12 (0.04)**                           | -0.04 (0.04)               |
| Male                                         | -0.62 (0.07)**                           | -0.28 (0.07)**                           | -0.09 (0.05)               |
| Parental Education                           | 0.05 (0.04)                              | 0.01 (0.04)                              | 0.07 (0.03)*               |
| Weeks since Schools Closed                   | -0.04 (0.06)                             | 0.07 (0.07)                              | 0.02 (0.06)                |
| Risk-taking*Male                             | -0.11 (0.07)                             | -0.2 (0.07)**                            | 0.18 (0.17)                |
| <b>Colombia</b>                              |                                          |                                          |                            |
| Intercept                                    | 0.34 (0.13)**                            | 0.2 (0.12)                               | 0.26 (0.12)*               |
| Externalizing Problems in Adolescence        | 0.01 (0.05)                              | -0.02 (0.05)                             | 0 (0.05)                   |
| Internalizing Problems in Adolescence        | 0.12 (0.04)**                            | 0.09 (0.05)                              | -0.06 (0.04)               |
| Risk-taking Tendencies in Adolescence        | -0.01 (0.06)                             | 0.07 (0.05)                              | -0.01 (0.03)               |
| Well-being in Adolescence                    | 0.11 (0.04)**                            | -0.07 (0.04)                             | -0.06 (0.03)*              |
| Confidence in Government's Pandemic Response | -0.08 (0.04)*                            | -0.12 (0.04)**                           | -0.04 (0.04)               |
| Male                                         | -0.62 (0.07)**                           | -0.28 (0.07)**                           | -0.09 (0.05)               |
| Parental Education                           | 0.05 (0.04)                              | 0.01 (0.04)                              | 0.07 (0.03)*               |
| Weeks since Schools Closed                   | -0.04 (0.06)                             | 0.07 (0.07)                              | 0.02 (0.06)                |
| Risk-taking*Male                             | -0.11 (0.07)                             | -0.2 (0.07)**                            | -0.08 (0.05)               |
| <b>Italy</b>                                 |                                          |                                          |                            |
| Intercept                                    | 0.18 (0.08)*                             | 0.29 (0.09)**                            | -0.15 (0.08)               |
| Externalizing Problems in Adolescence        | -0.16 (0.08)                             | -0.02 (0.05)                             | -0.26 (0.13)*              |
| Internalizing Problems in Adolescence        | 0.12 (0.04)**                            | 0.09 (0.05)                              | 0.26 (0.13)*               |
| Risk-taking Tendencies in Adolescence        | -0.01 (0.06)                             | 0.07 (0.05)                              | -0.01 (0.03)               |
| Well-being in Adolescence                    | -0.22 (0.07)**                           | -0.07 (0.04)                             | -0.06 (0.03)*              |
| Confidence in Government's Pandemic Response | -0.08 (0.04)*                            | -0.12 (0.04)**                           | -0.04 (0.04)               |
| Male                                         | -0.62 (0.07)**                           | -0.28 (0.07)**                           | -0.09 (0.05)               |
| Parental Education                           | 0.05 (0.04)                              | 0.01 (0.04)                              | 0.07 (0.03)*               |
| Weeks since Schools Closed                   | -0.04 (0.06)                             | 0.07 (0.07)                              | 0.02 (0.06)                |
| Risk-taking*Male                             | -0.11 (0.07)                             | -0.2 (0.07)**                            | -0.08 (0.05)               |
| <b>Jordan</b>                                |                                          |                                          |                            |
| Intercept                                    | 0.3 (0.12)*                              | 0.38 (0.12)**                            | 0.29 (0.07)**              |
| Externalizing Problems in Adolescence        | 0.01 (0.05)                              | -0.02 (0.05)                             | 0 (0.05)                   |
| Internalizing Problems in Adolescence        | 0.12 (0.04)**                            | 0.09 (0.05)                              | -0.06 (0.04)               |
| Risk-taking Tendencies in Adolescence        | -0.01 (0.06)                             | 0.07 (0.05)                              | -0.01 (0.03)               |
| Well-being in Adolescence                    | 0.11 (0.04)**                            | -0.07 (0.04)                             | -0.06 (0.03)*              |
| Confidence in Government's Pandemic Response | -0.08 (0.04)*                            | -0.12 (0.04)**                           | -0.04 (0.04)               |

|                                              |                |                |                |
|----------------------------------------------|----------------|----------------|----------------|
| Male                                         | -0.62 (0.07)** | -0.28 (0.07)** | -0.09 (0.05)   |
| Parental Education                           | 0.05 (0.04)    | 0.01 (0.04)    | 0.07 (0.03)*   |
| Weeks since Schools Closed                   | 0.78 (0.23)**  | 0.07 (0.07)    | 0.02 (0.06)    |
| Risk-taking*Male                             | -0.44 (0.19)*  | -0.2 (0.07)**  | -0.08 (0.05)   |
| Kenya                                        |                |                |                |
| Intercept                                    | 0.11 (0.18)    | -0.19 (0.16)   | -0.15 (0.18)   |
| Externalizing Problems in Adolescence        | 0.01 (0.05)    | -0.02 (0.05)   | 0 (0.05)       |
| Internalizing Problems in Adolescence        | 0.12 (0.04)**  | 0.09 (0.05)    | -0.06 (0.04)   |
| Risk-taking Tendencies in Adolescence        | -0.01 (0.06)   | 0.07 (0.05)    | -0.01 (0.03)   |
| Well-being in Adolescence                    | 0.11 (0.04)**  | -0.07 (0.04)   | -0.06 (0.03)*  |
| Confidence in Government's Pandemic Response | -0.08 (0.04)*  | -0.12 (0.04)** | -0.04 (0.04)   |
| Male                                         | -0.02 (0.21)   | -0.28 (0.07)** | -0.09 (0.05)   |
| Parental Education                           | 0.05 (0.04)    | 0.01 (0.04)    | 0.07 (0.03)*   |
| Weeks since Schools Closed                   | -0.04 (0.06)   | 0.07 (0.07)    | 0.02 (0.06)    |
| Risk-taking*Male                             | -0.11 (0.07)   | -0.2 (0.07)**  | -0.08 (0.05)   |
| Philippines                                  |                |                |                |
| Intercept                                    | 0.73 (0.12)**  | 0.1 (0.12)     | -0.69 (0.19)** |
| Externalizing Problems in Adolescence        | 0.01 (0.05)    | -0.02 (0.05)   | 0 (0.05)       |
| Internalizing Problems in Adolescence        | 0.12 (0.04)**  | 0.09 (0.05)    | -0.06 (0.04)   |
| Risk-taking Tendencies in Adolescence        | -0.01 (0.06)   | 0.07 (0.05)    | -0.01 (0.03)   |
| Well-being in Adolescence                    | 0.11 (0.04)**  | -0.07 (0.04)   | -0.06 (0.03)*  |
| Confidence in Government's Pandemic Response | -0.08 (0.04)*  | -0.37 (0.08)** | -0.04 (0.04)   |
| Male                                         | -0.62 (0.07)** | -0.28 (0.07)** | -0.09 (0.05)   |
| Parental Education                           | 0.05 (0.04)    | 0.01 (0.04)    | 0.07 (0.03)*   |
| Weeks since Schools Closed                   | -0.04 (0.06)   | 0.07 (0.07)    | 0.02 (0.06)    |
| Risk-taking*Male                             | -0.11 (0.07)   | -0.2 (0.07)**  | -0.08 (0.05)   |
| Sweden                                       |                |                |                |
| Intercept                                    | 0.23 (0.13)    | 0.21 (0.13)    | 0.1 (0.09)     |
| Externalizing Problems in Adolescence        | 0.01 (0.05)    | -0.02 (0.05)   | 0 (0.05)       |
| Internalizing Problems in Adolescence        | 0.12 (0.04)**  | 0.09 (0.05)    | -0.06 (0.04)   |
| Risk-taking Tendencies in Adolescence        | -0.01 (0.06)   | 0.07 (0.05)    | -0.01 (0.03)   |
| Well-being in Adolescence                    | 0.11 (0.04)**  | -0.07 (0.04)   | -0.06 (0.03)*  |
| Confidence in Government's Pandemic Response | -0.08 (0.04)*  | -0.12 (0.04)** | -0.04 (0.04)   |
| Male                                         | -0.62 (0.07)** | -0.28 (0.07)** | -0.09 (0.05)   |
| Parental Education                           | 0.05 (0.04)    | 0.01 (0.04)    | 0.07 (0.03)*   |
| Weeks since Schools Closed                   | -0.04 (0.06)   | 0.07 (0.07)    | 0.02 (0.06)    |
| Risk-taking*Male                             | -0.11 (0.07)   | -0.2 (0.07)**  | -0.08 (0.05)   |
| Thailand                                     |                |                |                |
| Intercept                                    | -0.47 (0.14)** | 1.51 (0.71)*   | -0.07 (0.12)   |
| Externalizing Problems in Adolescence        | 0.01 (0.05)    | -0.02 (0.05)   | -0.77 (0.17)** |
| Internalizing Problems in Adolescence        | 0.12 (0.04)**  | 0.09 (0.05)    | 0.4 (0.08)**   |
| Risk-taking Tendencies in Adolescence        | -0.01 (0.06)   | 0.07 (0.05)    | -0.01 (0.03)   |
| Well-being in Adolescence                    | 0.11 (0.04)**  | -0.07 (0.04)   | -0.06 (0.03)*  |
| Confidence in Government's Pandemic Response | -0.08 (0.04)*  | -0.12 (0.04)** | -0.04 (0.04)   |
| Male                                         | -0.15 (0.18)   | -0.28 (0.07)** | -0.09 (0.05)   |
| Parental Education                           | 0.05 (0.04)    | 0.01 (0.04)    | 0.07 (0.03)*   |
| Weeks since Schools Closed                   | -0.04 (0.06)   | 2 (0.68)**     | 0.02 (0.06)    |
| Risk-taking*Male                             | -0.11 (0.07)   | -0.2 (0.07)**  | -0.08 (0.05)   |

|                                              |                            |                            |                            |
|----------------------------------------------|----------------------------|----------------------------|----------------------------|
| United States                                |                            |                            |                            |
| Intercept                                    | 0.42 (0.09)**              | 0.09 (0.09)                | 0.27 (0.11)*               |
| Externalizing Problems in Adolescence        | 0.01 (0.05)                | -0.02 (0.05)               | 0 (0.05)                   |
| Internalizing Problems in Adolescence        | 0.12 (0.04)**              | 0.09 (0.05)                | -0.06 (0.04)               |
| Risk-taking Tendencies in Adolescence        | 0.32 (0.1)**               | 0.07 (0.05)                | -0.01 (0.03)               |
| Well-being in Adolescence                    | -0.27 (0.08)**             | -0.3 (0.08)**              | -0.06 (0.03)*              |
| Confidence in Government's Pandemic Response | -0.08 (0.04)*              | -0.12 (0.04)**             | -0.04 (0.04)               |
| Male                                         | -0.62 (0.07)**             | -0.28 (0.07)**             | -0.09 (0.05)               |
| Parental Education                           | 0.05 (0.04)                | 0.28 (0.09)**              | 0.07 (0.03)*               |
| Weeks since Schools Closed                   | -0.04 (0.06)               | 0.07 (0.07)                | 0.02 (0.06)                |
| Risk-taking*Male                             | -0.11 (0.07)               | -0.2 (0.07)**              | -0.08 (0.05)               |
| Model Fit Statistics                         |                            |                            |                            |
| Chi Square (DOF), <i>p</i> -value            | 71.28 (64), <i>p</i> =0.25 | 68.42 (68), <i>p</i> =0.46 | 67.87 (67), <i>p</i> =0.45 |
| RMSEA                                        | 0.03                       | 0.01                       | 0.01                       |
| CFI                                          | 0.95                       | 1                          | 0.98                       |
| SRMR                                         | 0.03                       | 0.034                      | 0.033                      |

b=standardized coefficient. \**p* < .05, \*\**p* < .01.

Supplemental Table 10: Full Information Maximum Likelihood Multiple Group Path Analyses Estimating Moderation of Relations between Pre-Pandemic Adolescent Risk-taking Tendencies and Maladaptive Behavior during the Pandemic by Parental Education

|                                              | Increase in<br>Internalizing<br>Problems | Increase in<br>Externalizing<br>Problems | Change in<br>Substance Use |
|----------------------------------------------|------------------------------------------|------------------------------------------|----------------------------|
|                                              | b (SE)                                   | b (SE)                                   | b (SE)                     |
| <b>China</b>                                 |                                          |                                          |                            |
| Intercept                                    | 0.14 (0.16)                              | -0.06 (0.18)                             | 0.06 (0.21)                |
| Externalizing Problems in Adolescence        | -0.03 (0.05)                             | -0.02 (0.05)                             | 0.01 (0.05)                |
| Internalizing Problems in Adolescence        | 0.1 (0.04)*                              | 0.09 (0.05)                              | -0.06 (0.04)               |
| Risk-taking Tendencies in Adolescence        | -0.09 (0.04)                             | 0.07 (0.05)                              | 0 (0.03)                   |
| Well-being in Adolescence                    | 0.1 (0.04)*                              | -0.07 (0.04)                             | -0.06 (0.03)*              |
| Confidence in Government's Pandemic Response | -0.07 (0.04)                             | -0.12 (0.04)**                           | 0.17 (0.13)                |
| Male                                         | -0.63 (0.08)**                           | -0.28 (0.07)**                           | -0.15 (0.06)*              |
| Parental Education                           | 0.04 (0.03)                              | 0.01 (0.04)                              | 0.04 (0.03)                |
| Weeks since Schools Closed                   | -0.04 (0.06)                             | 0.07 (0.07)                              | 0.01 (0.06)                |
| Risk-taking*Parental Education               | 0.06 (0.04)                              | -0.2 (0.07)**                            | -0.05 (0.03)               |
| <b>Colombia</b>                              |                                          |                                          |                            |
| Intercept                                    | 0.39 (0.13)**                            | 0.2 (0.12)                               | 0.22 (0.12)                |
| Externalizing Problems in Adolescence        | -0.03 (0.05)                             | -0.02 (0.05)                             | 0.01 (0.05)                |
| Internalizing Problems in Adolescence        | 0.1 (0.04)*                              | 0.09 (0.05)                              | -0.06 (0.04)               |
| Risk-taking Tendencies in Adolescence        | -0.09 (0.04)                             | 0.07 (0.05)                              | 0 (0.03)                   |
| Well-being in Adolescence                    | 0.1 (0.04)*                              | -0.07 (0.04)                             | -0.06 (0.03)*              |
| Confidence in Government's Pandemic Response | -0.07 (0.04)                             | -0.12 (0.04)**                           | -0.04 (0.04)               |
| Male                                         | -0.63 (0.08)**                           | -0.28 (0.07)**                           | -0.15 (0.06)*              |
| Parental Education                           | 0.04 (0.03)                              | 0.01 (0.04)                              | 0.04 (0.03)                |
| Weeks since Schools Closed                   | -0.04 (0.06)                             | 0.07 (0.07)                              | 0.01 (0.06)                |
| Risk-taking*Parental Education               | 0.06 (0.04)                              | -0.2 (0.07)**                            | -0.05 (0.03)               |
| <b>Italy</b>                                 |                                          |                                          |                            |
| Intercept                                    | 0.16 (0.08)*                             | 0.29 (0.09)**                            | -0.13 (0.08)               |
| Externalizing Problems in Adolescence        | -0.03 (0.05)                             | -0.02 (0.05)                             | -0.26 (0.13)*              |
| Internalizing Problems in Adolescence        | 0.1 (0.04)*                              | 0.09 (0.05)                              | 0.25 (0.12)*               |
| Risk-taking Tendencies in Adolescence        | -0.09 (0.04)                             | 0.07 (0.05)                              | 0 (0.03)                   |
| Well-being in Adolescence                    | -0.21 (0.07)**                           | -0.07 (0.04)                             | -0.06 (0.03)*              |
| Confidence in Government's Pandemic Response | -0.07 (0.04)                             | -0.12 (0.04)**                           | -0.04 (0.04)               |
| Male                                         | -0.63 (0.08)**                           | -0.28 (0.07)**                           | -0.15 (0.06)*              |
| Parental Education                           | 0.04 (0.03)                              | 0.01 (0.04)                              | 0.04 (0.03)                |
| Weeks since Schools Closed                   | -0.04 (0.06)                             | 0.07 (0.07)                              | 0.01 (0.06)                |
| Risk-taking*Parental Education               | 0.06 (0.04)                              | -0.2 (0.07)**                            | -0.05 (0.03)               |
| <b>Jordan</b>                                |                                          |                                          |                            |
| Intercept                                    | -0.29 (0.31)                             | 0.38 (0.12)**                            | 0.34 (0.07)**              |
| Externalizing Problems in Adolescence        | -0.03 (0.05)                             | -0.02 (0.05)                             | 0.01 (0.05)                |
| Internalizing Problems in Adolescence        | 0.1 (0.04)*                              | 0.09 (0.05)                              | -0.06 (0.04)               |
| Risk-taking Tendencies in Adolescence        | -0.39 (0.18)*                            | 0.07 (0.05)                              | 0 (0.03)                   |
| Well-being in Adolescence                    | 0.1 (0.04)*                              | -0.07 (0.04)                             | -0.06 (0.03)*              |
| Confidence in Government's Pandemic Response | -0.07 (0.04)                             | -0.12 (0.04)**                           | -0.04 (0.04)               |

|                                              |                |                |                |
|----------------------------------------------|----------------|----------------|----------------|
| Male                                         | 0.07 (0.3)     | -0.28 (0.07)** | -0.15 (0.06)*  |
| Parental Education                           | 0.04 (0.03)    | 0.01 (0.04)    | 0.04 (0.03)    |
| Weeks since Schools Closed                   | 0.78 (0.23)**  | 0.07 (0.07)    | 0.01 (0.06)    |
| Risk-taking*Parental Education               | 0.06 (0.04)    | -0.2 (0.07)**  | -0.05 (0.03)   |
| Kenya                                        |                |                |                |
| Intercept                                    | -6.51 (3.43)   | -0.19 (0.16)   | -0.12 (0.18)   |
| Externalizing Problems in Adolescence        | -0.03 (0.05)   | -0.02 (0.05)   | 0.01 (0.05)    |
| Internalizing Problems in Adolescence        | 0.1 (0.04)*    | 0.09 (0.05)    | -0.06 (0.04)   |
| Risk-taking Tendencies in Adolescence        | -0.09 (0.04)   | 0.07 (0.05)    | 0 (0.03)       |
| Well-being in Adolescence                    | 0.1 (0.04)*    | -0.07 (0.04)   | -0.06 (0.03)*  |
| Confidence in Government's Pandemic Response | -0.07 (0.04)   | -0.12 (0.04)** | -0.04 (0.04)   |
| Male                                         | -0.04 (0.21)   | -0.28 (0.07)** | -0.15 (0.06)*  |
| Parental Education                           | 0.04 (0.03)    | 0.01 (0.04)    | 0.04 (0.03)    |
| Weeks since Schools Closed                   | 4.04 (2.14)    | 0.07 (0.07)    | 0.01 (0.06)    |
| Risk-taking*Parental Education               | 0.06 (0.04)    | -0.2 (0.07)**  | -0.05 (0.03)   |
| Philippines                                  |                |                |                |
| Intercept                                    | 0.73 (0.12)**  | 0.1 (0.12)     | -0.66 (0.18)** |
| Externalizing Problems in Adolescence        | -0.03 (0.05)   | -0.02 (0.05)   | 0.01 (0.05)    |
| Internalizing Problems in Adolescence        | 0.1 (0.04)*    | 0.09 (0.05)    | -0.06 (0.04)   |
| Risk-taking Tendencies in Adolescence        | -0.09 (0.04)   | 0.07 (0.05)    | 0 (0.03)       |
| Well-being in Adolescence                    | 0.1 (0.04)*    | -0.07 (0.04)   | -0.06 (0.03)*  |
| Confidence in Government's Pandemic Response | -0.07 (0.04)   | -0.37 (0.08)** | -0.04 (0.04)   |
| Male                                         | -0.63 (0.08)** | -0.28 (0.07)** | -0.15 (0.06)*  |
| Parental Education                           | 0.04 (0.03)    | 0.01 (0.04)    | 0.04 (0.03)    |
| Weeks since Schools Closed                   | -0.04 (0.06)   | 0.07 (0.07)    | 0.01 (0.06)    |
| Risk-taking*Parental Education               | 0.06 (0.04)    | -0.2 (0.07)**  | -0.05 (0.03)   |
| Sweden                                       |                |                |                |
| Intercept                                    | 0.46 (0.15)**  | 0.21 (0.13)    | 0.03 (0.1)     |
| Externalizing Problems in Adolescence        | -0.03 (0.05)   | -0.02 (0.05)   | 0.01 (0.05)    |
| Internalizing Problems in Adolescence        | 0.57 (0.18)**  | 0.09 (0.05)    | -0.06 (0.04)   |
| Risk-taking Tendencies in Adolescence        | -0.09 (0.04)   | 0.07 (0.05)    | 0 (0.03)       |
| Well-being in Adolescence                    | 0.37 (0.15)*   | -0.07 (0.04)   | -0.06 (0.03)*  |
| Confidence in Government's Pandemic Response | -0.07 (0.04)   | -0.12 (0.04)** | -0.04 (0.04)   |
| Male                                         | -0.63 (0.08)** | -0.28 (0.07)** | 0.11 (0.13)    |
| Parental Education                           | 0.04 (0.03)    | 0.01 (0.04)    | 0.04 (0.03)    |
| Weeks since Schools Closed                   | -0.04 (0.06)   | 0.07 (0.07)    | 0.01 (0.06)    |
| Risk-taking*Parental Education               | 0.06 (0.04)    | -0.2 (0.07)**  | -0.05 (0.03)   |
| Thailand                                     |                |                |                |
| Intercept                                    | -0.44 (0.14)** | 1.51 (0.71)*   | -0.05 (0.12)   |
| Externalizing Problems in Adolescence        | -0.03 (0.05)   | -0.02 (0.05)   | -0.76 (0.17)** |
| Internalizing Problems in Adolescence        | 0.1 (0.04)*    | 0.09 (0.05)    | 0.4 (0.08)**   |
| Risk-taking Tendencies in Adolescence        | -0.09 (0.04)   | 0.07 (0.05)    | 0 (0.03)       |
| Well-being in Adolescence                    | 0.1 (0.04)*    | -0.07 (0.04)   | -0.06 (0.03)*  |
| Confidence in Government's Pandemic Response | -0.07 (0.04)   | -0.12 (0.04)** | -0.04 (0.04)   |
| Male                                         | -0.16 (0.18)   | -0.28 (0.07)** | -0.15 (0.06)*  |
| Parental Education                           | 0.04 (0.03)    | 0.01 (0.04)    | 0.04 (0.03)    |
| Weeks since Schools Closed                   | -0.04 (0.06)   | 2 (0.68)**     | 0.01 (0.06)    |
| Risk-taking*Parental Education               | -0.2 (0.12)    | -0.2 (0.07)**  | -0.05 (0.03)   |

|                                              |                            |                            |                            |
|----------------------------------------------|----------------------------|----------------------------|----------------------------|
| United States                                |                            |                            |                            |
| Intercept                                    | 0.39 (0.09)**              | 0.09 (0.09)                | 0.25 (0.11)*               |
| Externalizing Problems in Adolescence        | -0.03 (0.05)               | -0.02 (0.05)               | 0.01 (0.05)                |
| Internalizing Problems in Adolescence        | 0.1 (0.04)*                | 0.09 (0.05)                | -0.06 (0.04)               |
| Risk-taking Tendencies in Adolescence        | 0.15 (0.09)                | 0.07 (0.05)                | 0 (0.03)                   |
| Well-being in Adolescence                    | -0.28 (0.08)**             | -0.3 (0.08)**              | -0.06 (0.03)*              |
| Confidence in Government's Pandemic Response | -0.07 (0.04)               | -0.12 (0.04)**             | -0.04 (0.04)               |
| Male                                         | -0.63 (0.08)**             | -0.28 (0.07)**             | -0.15 (0.06)*              |
| Parental Education                           | 0.04 (0.03)                | 0.28 (0.09)**              | 0.24 (0.09)*               |
| Weeks since Schools Closed                   | -0.04 (0.06)               | 0.07 (0.07)                | 0.01 (0.06)                |
| Risk-taking*Parental Education               | 0.2 (0.08)*                | -0.2 (0.07)**              | -0.05 (0.03)               |
| Model Fit Statistics                         |                            |                            |                            |
| Chi Square (DOF), <i>p</i> -value            | 68.13 (59), <i>p</i> =0.19 | 68.42 (68), <i>p</i> =0.46 | 66.65 (65), <i>p</i> =0.42 |
| RMSEA                                        | 0.03                       | 0.01                       | 0.01                       |
| CFI                                          | 0.94                       | 1                          | 0.97                       |
| SRMR                                         | 0.05                       | 0.034                      | 0.046                      |

b=standardized coefficient. \**p* < .05, \*\**p* < .01.

Supplemental Table 11: Full Information Maximum Likelihood Multiple Group Path Analyses Estimating Moderation of Relations between Pre-Pandemic Adolescent Well-being and Maladaptive Behavior during the Pandemic by Confidence in Government's Response

|                                              | Increase in<br>Internalizing<br>Problems | Increase in<br>Externalizing<br>Problems | Change in<br>Substance Use |
|----------------------------------------------|------------------------------------------|------------------------------------------|----------------------------|
|                                              | b (SE)                                   | b (SE)                                   | b (SE)                     |
| <b>China</b>                                 |                                          |                                          |                            |
| Intercept                                    | 0.17 (0.16)                              | -0.08 (0.18)                             | -0.42 (0.39)               |
| Externalizing Problems in Adolescence        | -0.02 (0.05)                             | -0.01 (0.05)                             | 0 (0.05)                   |
| Internalizing Problems in Adolescence        | 0.11 (0.04)*                             | 0.07 (0.05)                              | -0.06 (0.04)               |
| Risk-taking Tendencies in Adolescence        | -0.16 (0.05)**                           | -0.04 (0.04)                             | 0.06 (0.05)                |
| Well-being in Adolescence                    | 0.11 (0.04)**                            | -0.17 (0.04)**                           | -0.75 (0.39)               |
| Confidence in Government's Pandemic Response | -0.07 (0.04)                             | -0.15 (0.04)**                           | 0.5 (0.27)                 |
| Male                                         | -0.65 (0.08)**                           | -0.29 (0.07)**                           | -0.08 (0.05)               |
| Parental Education                           | 0.05 (0.04)                              | -0.01 (0.04)                             | 0.04 (0.03)                |
| Weeks since Schools Closed                   | -0.04 (0.06)                             | 0.09 (0.07)                              | 0.03 (0.06)                |
| Well-being*Government Confidence             | 0.05 (0.04)                              | 0.13 (0.04)**                            | 0.53 (0.27)*               |
| <b>Colombia</b>                              |                                          |                                          |                            |
| Intercept                                    | 0.39 (0.13)**                            | 0.22 (0.12)                              | 0.21 (0.12)                |
| Externalizing Problems in Adolescence        | -0.02 (0.05)                             | -0.01 (0.05)                             | 0 (0.05)                   |
| Internalizing Problems in Adolescence        | 0.11 (0.04)*                             | 0.07 (0.05)                              | -0.06 (0.04)               |
| Risk-taking Tendencies in Adolescence        | -0.16 (0.05)**                           | -0.04 (0.04)                             | -0.05 (0.03)               |
| Well-being in Adolescence                    | 0.11 (0.04)**                            | -0.17 (0.04)**                           | -0.04 (0.03)               |
| Confidence in Government's Pandemic Response | -0.07 (0.04)                             | -0.15 (0.04)**                           | -0.05 (0.04)               |
| Male                                         | -0.65 (0.08)**                           | -0.29 (0.07)**                           | -0.08 (0.05)               |
| Parental Education                           | 0.05 (0.04)                              | -0.01 (0.04)                             | 0.04 (0.03)                |
| Weeks since Schools Closed                   | -0.04 (0.06)                             | 0.09 (0.07)                              | 0.03 (0.06)                |
| Well-being*Government Confidence             | 0.05 (0.04)                              | 0.13 (0.04)**                            | 0.01 (0.03)                |
| <b>Italy</b>                                 |                                          |                                          |                            |
| Intercept                                    | 0.13 (0.08)                              | 0.28 (0.08)**                            | -0.15 (0.08)*              |
| Externalizing Problems in Adolescence        | -0.02 (0.05)                             | -0.01 (0.05)                             | -0.27 (0.13)*              |
| Internalizing Problems in Adolescence        | 0.11 (0.04)*                             | 0.07 (0.05)                              | 0.26 (0.13)*               |
| Risk-taking Tendencies in Adolescence        | 0.04 (0.08)                              | -0.04 (0.04)                             | -0.05 (0.03)               |
| Well-being in Adolescence                    | -0.21 (0.07)**                           | -0.17 (0.04)**                           | -0.04 (0.03)               |
| Confidence in Government's Pandemic Response | -0.07 (0.04)                             | -0.15 (0.04)**                           | -0.05 (0.04)               |
| Male                                         | -0.65 (0.08)**                           | -0.29 (0.07)**                           | -0.08 (0.05)               |
| Parental Education                           | 0.05 (0.04)                              | -0.01 (0.04)                             | 0.04 (0.03)                |
| Weeks since Schools Closed                   | -0.04 (0.06)                             | 0.09 (0.07)                              | 0.03 (0.06)                |
| Well-being*Government Confidence             | 0.05 (0.04)                              | 0.13 (0.04)**                            | 0.01 (0.03)                |
| <b>Jordan</b>                                |                                          |                                          |                            |
| Intercept                                    | 0.01 (0.16)                              | 0.32 (0.12)**                            | 0.28 (0.07)**              |
| Externalizing Problems in Adolescence        | -0.02 (0.05)                             | -0.01 (0.05)                             | 0 (0.05)                   |
| Internalizing Problems in Adolescence        | 0.11 (0.04)*                             | 0.07 (0.05)                              | -0.06 (0.04)               |
| Risk-taking Tendencies in Adolescence        | -0.16 (0.05)**                           | -0.04 (0.04)                             | -0.05 (0.03)               |
| Well-being in Adolescence                    | 0.11 (0.04)**                            | -0.17 (0.04)**                           | -0.04 (0.03)               |
| Confidence in Government's Pandemic Response | -0.07 (0.04)                             | -0.15 (0.04)**                           | -0.05 (0.04)               |

|                                              |                |                |                |
|----------------------------------------------|----------------|----------------|----------------|
| Male                                         | -0.18 (0.18)   | -0.29 (0.07)** | -0.08 (0.05)   |
| Parental Education                           | 0.05 (0.04)    | -0.01 (0.04)   | 0.04 (0.03)    |
| Weeks since Schools Closed                   | 0.63 (0.23)**  | 0.09 (0.07)    | 0.03 (0.06)    |
| Well-being*Government Confidence             | -0.16 (0.09)   | 0.13 (0.04)**  | 0.01 (0.03)    |
| <b>Kenya</b>                                 |                |                |                |
| Intercept                                    | 0 (0.18)       | -0.18 (0.17)   | -0.18 (0.18)   |
| Externalizing Problems in Adolescence        | -0.02 (0.05)   | -0.01 (0.05)   | 0 (0.05)       |
| Internalizing Problems in Adolescence        | 0.11 (0.04)*   | 0.07 (0.05)    | -0.06 (0.04)   |
| Risk-taking Tendencies in Adolescence        | -0.16 (0.05)** | -0.04 (0.04)   | -0.05 (0.03)   |
| Well-being in Adolescence                    | 0.11 (0.04)**  | -0.17 (0.04)** | -0.04 (0.03)   |
| Confidence in Government's Pandemic Response | -0.07 (0.04)   | -0.15 (0.04)** | -0.05 (0.04)   |
| Male                                         | 0.04 (0.21)    | -0.29 (0.07)** | -0.08 (0.05)   |
| Parental Education                           | 0.05 (0.04)    | -0.01 (0.04)   | 0.04 (0.03)    |
| Weeks since Schools Closed                   | -0.04 (0.06)   | 0.09 (0.07)    | 0.03 (0.06)    |
| Well-being*Government Confidence             | 0.05 (0.04)    | 0.13 (0.04)**  | 0.01 (0.03)    |
| <b>Philippines</b>                           |                |                |                |
| Intercept                                    | 0.73 (0.12)**  | 0.05 (0.11)    | -0.7 (0.18)**  |
| Externalizing Problems in Adolescence        | -0.02 (0.05)   | -0.01 (0.05)   | 0 (0.05)       |
| Internalizing Problems in Adolescence        | 0.11 (0.04)*   | 0.07 (0.05)    | -0.06 (0.04)   |
| Risk-taking Tendencies in Adolescence        | -0.16 (0.05)** | -0.04 (0.04)   | -0.05 (0.03)   |
| Well-being in Adolescence                    | 0.11 (0.04)**  | 0.09 (0.10)    | -0.04 (0.03)   |
| Confidence in Government's Pandemic Response | -0.07 (0.04)   | -0.42 (0.08)** | -0.05 (0.04)   |
| Male                                         | -0.65 (0.08)** | -0.29 (0.07)** | -0.08 (0.05)   |
| Parental Education                           | 0.05 (0.04)    | -0.01 (0.04)   | 0.04 (0.03)    |
| Weeks since Schools Closed                   | -0.04 (0.06)   | 0.09 (0.07)    | 0.03 (0.06)    |
| Well-being*Government Confidence             | -0.12 (0.07)   | 0.13 (0.04)**  | 0.01 (0.03)    |
| <b>Sweden</b>                                |                |                |                |
| Intercept                                    | 0.14 (0.13)    | 0.23 (0.13)    | 0.13 (0.08)    |
| Externalizing Problems in Adolescence        | -0.02 (0.05)   | -0.01 (0.05)   | 0 (0.05)       |
| Internalizing Problems in Adolescence        | 0.11 (0.04)*   | 0.07 (0.05)    | -0.06 (0.04)   |
| Risk-taking Tendencies in Adolescence        | 0.22 (0.14)    | -0.04 (0.04)   | -0.05 (0.03)   |
| Well-being in Adolescence                    | 0.11 (0.04)**  | -0.17 (0.04)** | -0.04 (0.03)   |
| Confidence in Government's Pandemic Response | -0.07 (0.04)   | -0.15 (0.04)** | -0.05 (0.04)   |
| Male                                         | -0.65 (0.08)** | -0.29 (0.07)** | -0.08 (0.05)   |
| Parental Education                           | 0.05 (0.04)    | -0.01 (0.04)   | 0.04 (0.03)    |
| Weeks since Schools Closed                   | -0.04 (0.06)   | 0.09 (0.07)    | 0.03 (0.06)    |
| Well-being*Government Confidence             | 0.05 (0.04)    | 0.13 (0.04)**  | 0.01 (0.03)    |
| <b>Thailand</b>                              |                |                |                |
| Intercept                                    | -0.42 (0.15)** | -0.46 (0.12)** | -0.07 (0.12)   |
| Externalizing Problems in Adolescence        | -0.02 (0.05)   | -0.01 (0.05)   | -0.78 (0.17)** |
| Internalizing Problems in Adolescence        | 0.11 (0.04)*   | 0.07 (0.05)    | 0.42 (0.08)**  |
| Risk-taking Tendencies in Adolescence        | -0.16 (0.05)** | -0.04 (0.04)   | -0.05 (0.03)   |
| Well-being in Adolescence                    | 0.11 (0.04)**  | -0.17 (0.04)** | -0.04 (0.03)   |
| Confidence in Government's Pandemic Response | -0.07 (0.04)   | -0.15 (0.04)** | -0.05 (0.04)   |
| Male                                         | -0.21 (0.18)   | -0.29 (0.07)** | -0.08 (0.05)   |
| Parental Education                           | 0.05 (0.04)    | -0.01 (0.04)   | 0.04 (0.03)    |
| Weeks since Schools Closed                   | -0.04 (0.06)   | 0.09 (0.07)    | 0.03 (0.06)    |
| Well-being*Government Confidence             | 0.05 (0.04)    | -0.14 (0.09)   | 0.01 (0.03)    |



|                                              |                            |                            |                            |
|----------------------------------------------|----------------------------|----------------------------|----------------------------|
| United States                                |                            |                            |                            |
| Intercept                                    | 0.42 (0.1)**               | 0.08 (0.09)                | 0.21 (0.11)                |
| Externalizing Problems in Adolescence        | -0.02 (0.05)               | -0.01 (0.05)               | 0 (0.05)                   |
| Internalizing Problems in Adolescence        | 0.11 (0.04)*               | 0.07 (0.05)                | -0.06 (0.04)               |
| Risk-taking Tendencies in Adolescence        | 0.25 (0.1)**               | -0.04 (0.04)               | -0.05 (0.03)               |
| Well-being in Adolescence                    | -0.26 (0.08)**             | -0.17 (0.04)**             | -0.04 (0.03)               |
| Confidence in Government's Pandemic Response | -0.07 (0.04)               | -0.15 (0.04)**             | -0.05 (0.04)               |
| Male                                         | -0.65 (0.08)**             | -0.29 (0.07)**             | -0.08 (0.05)               |
| Parental Education                           | 0.05 (0.04)                | 0.28 (0.08)**              | 0.23 (0.10)*               |
| Weeks since Schools Closed                   | -0.04 (0.06)               | 0.09 (0.07)                | 0.03 (0.06)                |
| Well-being*Government Confidence             | 0.05 (0.04)                | 0.13 (0.04)**              | 0.01 (0.03)                |
| Model Fit Statistics                         |                            |                            |                            |
| Chi Square (DOF), <i>p</i> -value            | 67.95 (61), <i>p</i> =0.25 | 71.09 (68), <i>p</i> =0.38 | 58.03 (63), <i>p</i> =0.65 |
| RMSEA                                        | 0.03                       | 0.02                       | 0                          |
| CFI                                          | 0.95                       | 0.96                       | 1                          |
| SRMR                                         | 0.03                       | 0.034                      | 0.029                      |

b=standardized coefficient. \**p* < .05, \*\**p* < .01.

Supplemental Table 12: Full Information Maximum Likelihood Multiple Group Path Analyses Estimating Moderation of Relations between Pre-Pandemic Adolescent Well-being and Maladaptive Behavior during the Pandemic by Gender

|                                              | Increase in<br>Internalizing<br>Problems | Increase in<br>Externalizing<br>Problems | Change in<br>Substance Use |
|----------------------------------------------|------------------------------------------|------------------------------------------|----------------------------|
|                                              | b (SE)                                   | b (SE)                                   | b (SE)                     |
| <b>China</b>                                 |                                          |                                          |                            |
| Intercept                                    | 0.19 (0.16)                              | -0.08 (0.18)                             | 0.28 (0.14)*               |
| Externalizing Problems in Adolescence        | -0.03 (0.05)                             | -0.01 (0.05)                             | -0.04 (0.05)               |
| Internalizing Problems in Adolescence        | 0.1 (0.04)*                              | 0.09 (0.05)                              | -0.03 (0.04)               |
| Risk-taking Tendencies in Adolescence        | -0.09 (0.04)*                            | -0.03 (0.04)                             | 0 (0.03)                   |
| Well-being in Adolescence                    | 0.13 (0.05)*                             | -0.04 (0.05)                             | 0.01 (0.03)                |
| Confidence in Government's Pandemic Response | -0.07 (0.04)                             | -0.12 (0.04)**                           | -0.02 (0.04)               |
| Male                                         | -0.66 (0.08)**                           | -0.28 (0.07)**                           | -0.11 (0.05)*              |
| Parental Education                           | 0.06 (0.04)                              | 0.01 (0.04)                              | 0.07 (0.03)*               |
| Weeks since Schools Closed                   | -0.04 (0.06)                             | 0.07 (0.07)                              | 0.01 (0.07)                |
| Well-being*Male                              | -0.04 (0.06)                             | -0.06 (0.07)                             | -0.15 (0.05)**             |
| <b>Colombia</b>                              |                                          |                                          |                            |
| Intercept                                    | 0.39 (0.13)**                            | 0.17 (0.12)                              | 0.26 (0.12)*               |
| Externalizing Problems in Adolescence        | -0.03 (0.05)                             | -0.01 (0.05)                             | -0.04 (0.05)               |
| Internalizing Problems in Adolescence        | 0.1 (0.04)*                              | 0.09 (0.05)                              | -0.03 (0.04)               |
| Risk-taking Tendencies in Adolescence        | -0.09 (0.04)*                            | -0.03 (0.04)                             | 0 (0.03)                   |
| Well-being in Adolescence                    | 0.13 (0.05)*                             | -0.04 (0.05)                             | 0.01 (0.03)                |
| Confidence in Government's Pandemic Response | -0.07 (0.04)                             | -0.12 (0.04)**                           | -0.02 (0.04)               |
| Male                                         | -0.66 (0.08)**                           | -0.28 (0.07)**                           | -0.11 (0.05)*              |
| Parental Education                           | 0.06 (0.04)                              | 0.01 (0.04)                              | 0.07 (0.03)*               |
| Weeks since Schools Closed                   | -0.04 (0.06)                             | 0.07 (0.07)                              | 0.01 (0.07)                |
| Well-being*Male                              | -0.04 (0.06)                             | -0.06 (0.07)                             | -0.15 (0.05)**             |
| <b>Italy</b>                                 |                                          |                                          |                            |
| Intercept                                    | 0.18 (0.08)*                             | 0.28 (0.09)**                            | -0.17 (0.08)*              |
| Externalizing Problems in Adolescence        | -0.03 (0.05)                             | -0.01 (0.05)                             | -0.04 (0.05)               |
| Internalizing Problems in Adolescence        | 0.1 (0.04)*                              | 0.09 (0.05)                              | 0.16 (0.11)                |
| Risk-taking Tendencies in Adolescence        | -0.09 (0.04)*                            | -0.03 (0.04)                             | 0 (0.03)                   |
| Well-being in Adolescence                    | -0.19 (0.07)**                           | -0.04 (0.05)                             | 0.01 (0.03)                |
| Confidence in Government's Pandemic Response | -0.07 (0.04)                             | -0.12 (0.04)**                           | -0.02 (0.04)               |
| Male                                         | -0.66 (0.08)**                           | -0.28 (0.07)**                           | -0.11 (0.05)*              |
| Parental Education                           | 0.06 (0.04)                              | 0.01 (0.04)                              | 0.07 (0.03)*               |
| Weeks since Schools Closed                   | -0.04 (0.06)                             | 0.07 (0.07)                              | 0.01 (0.07)                |
| Well-being*Male                              | -0.04 (0.06)                             | -0.06 (0.07)                             | -0.15 (0.05)**             |
| <b>Jordan</b>                                |                                          |                                          |                            |
| Intercept                                    | 0.13 (0.15)                              | 0.3 (0.12)**                             | 0.31 (0.06)**              |
| Externalizing Problems in Adolescence        | -0.03 (0.05)                             | -0.01 (0.05)                             | -0.04 (0.05)               |
| Internalizing Problems in Adolescence        | 0.1 (0.04)*                              | 0.09 (0.05)                              | -0.03 (0.04)               |
| Risk-taking Tendencies in Adolescence        | -0.09 (0.04)*                            | -0.03 (0.04)                             | 0 (0.03)                   |
| Well-being in Adolescence                    | 0.13 (0.05)*                             | -0.04 (0.05)                             | 0.01 (0.03)                |
| Confidence in Government's Pandemic Response | -0.07 (0.04)                             | -0.12 (0.04)**                           | -0.02 (0.04)               |

|                                              |                |                |                |
|----------------------------------------------|----------------|----------------|----------------|
| Male                                         | -0.24 (0.19)   | -0.28 (0.07)** | -0.11 (0.05)*  |
| Parental Education                           | 0.06 (0.04)    | 0.01 (0.04)    | 0.07 (0.03)*   |
| Weeks since Schools Closed                   | 0.66 (0.22)**  | 0.07 (0.07)    | 0.01 (0.07)    |
| Well-being*Male                              | -0.04 (0.06)   | -0.06 (0.07)   | -0.15 (0.05)** |
| Kenya                                        |                |                |                |
| Intercept                                    | 0.03 (0.18)    | -0.19 (0.16)   | -0.12 (0.18)   |
| Externalizing Problems in Adolescence        | -0.03 (0.05)   | -0.01 (0.05)   | -0.04 (0.05)   |
| Internalizing Problems in Adolescence        | 0.1 (0.04)*    | 0.09 (0.05)    | -0.03 (0.04)   |
| Risk-taking Tendencies in Adolescence        | -0.09 (0.04)*  | -0.03 (0.04)   | 0 (0.03)       |
| Well-being in Adolescence                    | 0.13 (0.05)*   | -0.04 (0.05)   | 0.01 (0.03)    |
| Confidence in Government's Pandemic Response | -0.07 (0.04)   | -0.12 (0.04)** | -0.02 (0.04)   |
| Male                                         | 0.05 (0.21)    | -0.28 (0.07)** | -0.11 (0.05)*  |
| Parental Education                           | 0.06 (0.04)    | 0.01 (0.04)    | 0.07 (0.03)*   |
| Weeks since Schools Closed                   | -0.04 (0.06)   | 0.07 (0.07)    | 0.01 (0.07)    |
| Well-being*Male                              | -0.04 (0.06)   | -0.06 (0.07)   | -0.15 (0.05)** |
| Philippines                                  |                |                |                |
| Intercept                                    | 0.74 (0.12)**  | 0.1 (0.12)     | -0.69 (0.18)** |
| Externalizing Problems in Adolescence        | -0.03 (0.05)   | -0.01 (0.05)   | -0.04 (0.05)   |
| Internalizing Problems in Adolescence        | 0.1 (0.04)*    | 0.09 (0.05)    | -0.03 (0.04)   |
| Risk-taking Tendencies in Adolescence        | -0.09 (0.04)*  | -0.03 (0.04)   | 0 (0.03)       |
| Well-being in Adolescence                    | 0.13 (0.05)*   | -0.04 (0.05)   | 0.01 (0.03)    |
| Confidence in Government's Pandemic Response | -0.07 (0.04)   | -0.36 (0.08)** | -0.02 (0.04)   |
| Male                                         | -0.66 (0.08)** | -0.28 (0.07)** | -0.11 (0.05)*  |
| Parental Education                           | 0.06 (0.04)    | 0.01 (0.04)    | 0.07 (0.03)*   |
| Weeks since Schools Closed                   | -0.04 (0.06)   | 0.07 (0.07)    | 0.01 (0.07)    |
| Well-being*Male                              | -0.04 (0.06)   | -0.06 (0.07)   | -0.15 (0.05)** |
| Sweden                                       |                |                |                |
| Intercept                                    | 0.37 (0.15)*   | 0.23 (0.13)    | 0.08 (0.09)    |
| Externalizing Problems in Adolescence        | -0.03 (0.05)   | -0.01 (0.05)   | -0.04 (0.05)   |
| Internalizing Problems in Adolescence        | 0.42 (0.15)**  | 0.09 (0.05)    | -0.03 (0.04)   |
| Risk-taking Tendencies in Adolescence        | -0.09 (0.04)*  | -0.03 (0.04)   | 0 (0.03)       |
| Well-being in Adolescence                    | 0.13 (0.05)*   | -0.04 (0.05)   | 0.01 (0.03)    |
| Confidence in Government's Pandemic Response | -0.07 (0.04)   | -0.12 (0.04)** | -0.02 (0.04)   |
| Male                                         | -0.66 (0.08)** | -0.28 (0.07)** | -0.11 (0.05)*  |
| Parental Education                           | 0.06 (0.04)    | 0.01 (0.04)    | 0.07 (0.03)*   |
| Weeks since Schools Closed                   | -0.04 (0.06)   | 0.07 (0.07)    | 0.01 (0.07)    |
| Well-being*Male                              | -0.04 (0.06)   | -0.06 (0.07)   | -0.15 (0.05)** |
| Thailand                                     |                |                |                |
| Intercept                                    | -0.45 (0.15)** | 1.62 (0.69)*   | -0.07 (0.12)   |
| Externalizing Problems in Adolescence        | -0.03 (0.05)   | -0.01 (0.05)   | -0.75 (0.16)** |
| Internalizing Problems in Adolescence        | 0.1 (0.04)*    | 0.09 (0.05)    | 0.39 (0.07)**  |
| Risk-taking Tendencies in Adolescence        | -0.09 (0.04)*  | -0.03 (0.04)   | 0 (0.03)       |
| Well-being in Adolescence                    | 0.13 (0.05)*   | -0.04 (0.05)   | 0.01 (0.03)    |
| Confidence in Government's Pandemic Response | -0.07 (0.04)   | -0.12 (0.04)** | -0.02 (0.04)   |
| Male                                         | -0.18 (0.18)   | -0.28 (0.07)** | -0.11 (0.05)*  |
| Parental Education                           | 0.06 (0.04)    | 0.01 (0.04)    | 0.07 (0.03)*   |
| Weeks since Schools Closed                   | -0.04 (0.06)   | 2.09 (0.66)**  | 0.01 (0.07)    |
| Well-being*Male                              | -0.04 (0.06)   | -0.06 (0.07)   | -0.15 (0.05)** |

|                                              |                            |                            |                           |
|----------------------------------------------|----------------------------|----------------------------|---------------------------|
| United States                                |                            |                            |                           |
| Intercept                                    | 0.42 (0.10)**              | 0.08 (0.10)                | 0.26 (0.11)*              |
| Externalizing Problems in Adolescence        | -0.03 (0.05)               | -0.01 (0.05)               | -0.04 (0.05)              |
| Internalizing Problems in Adolescence        | 0.1 (0.04)*                | 0.09 (0.05)                | -0.03 (0.04)              |
| Risk-taking Tendencies in Adolescence        | 0.25 (0.1)*                | -0.03 (0.04)               | 0 (0.03)                  |
| Well-being in Adolescence                    | -0.26 (0.09)**             | -0.27 (0.09)**             | 0.01 (0.03)               |
| Confidence in Government's Pandemic Response | -0.07 (0.04)               | -0.12 (0.04)**             | -0.02 (0.04)              |
| Male                                         | -0.66 (0.08)**             | -0.28 (0.07)**             | -0.11 (0.05)*             |
| Parental Education                           | 0.06 (0.04)                | 0.29 (0.09)**              | 0.07 (0.03)*              |
| Weeks since Schools Closed                   | -0.04 (0.06)               | 0.07 (0.07)                | 0.01 (0.07)               |
| Well-being*Male                              | -0.04 (0.06)               | -0.06 (0.07)               | -0.15 (0.05)**            |
| Model Fit Statistics                         |                            |                            |                           |
| Chi Square (DOF), <i>p</i> -value            | 70.97 (64), <i>p</i> =0.26 | 71.64 (68), <i>p</i> =0.36 | 71.2 (69), <i>p</i> =0.40 |
| RMSEA                                        | 0.03                       | 0.02                       | 0.02                      |
| CFI                                          | 0.95                       | 0.95                       | 0.96                      |
| SRMR                                         | 0.03                       | 0.034                      | 0.034                     |

b=standardized coefficient. \**p* < .05, \*\**p* < .01.

Supplemental Table 13: Full Information Maximum Likelihood Multiple Group Path Analyses Estimating Moderation of Relations between Pre-Pandemic Adolescent Well-being and Maladaptive Behavior during the Pandemic by Parental Education

|                                              | Increase in<br>Internalizing<br>Problems | Increase in<br>Externalizing<br>Problems | Change in Substance<br>Use |
|----------------------------------------------|------------------------------------------|------------------------------------------|----------------------------|
|                                              | b (SE)                                   | b (SE)                                   | b (SE)                     |
| <b>China</b>                                 |                                          |                                          |                            |
| Intercept                                    | 0.17 (0.16)                              | -0.13 (0.18)                             | -0.04 (0.25)               |
| Externalizing Problems in Adolescence        | -0.03 (0.05)                             | -0.02 (0.05)                             | 0 (0.05)                   |
| Internalizing Problems in Adolescence        | 0.11 (0.04)*                             | 0.09 (0.05)                              | -0.06 (0.04)               |
| Risk-taking Tendencies in Adolescence        | -0.11 (0.04)**                           | -0.03 (0.04)                             | -0.01 (0.03)               |
| Well-being in Adolescence                    | 0.11 (0.04)**                            | -0.08 (0.04)                             | -0.04 (0.03)               |
| Confidence in Government's Pandemic Response | -0.07 (0.04)                             | -0.12 (0.04)**                           | 0.19 (0.14)                |
| Male                                         | -0.65 (0.08)**                           | -0.29 (0.07)**                           | -0.09 (0.05)               |
| Parental Education                           | 0.06 (0.04)                              | -0.01 (0.04)                             | 0.09 (0.03)**              |
| Weeks since Schools Closed                   | -0.05 (0.06)                             | 0.08 (0.07)                              | 0.02 (0.06)                |
| Well-being*Parental Education                | 0.02 (0.03)                              | 0.07 (0.03)*                             | 0.21 (0.11)                |
| <b>Colombia</b>                              |                                          |                                          |                            |
| Intercept                                    | 0.38 (0.13)**                            | 0.17 (0.12)                              | 0.24 (0.12)*               |
| Externalizing Problems in Adolescence        | -0.03 (0.05)                             | -0.02 (0.05)                             | 0 (0.05)                   |
| Internalizing Problems in Adolescence        | 0.11 (0.04)*                             | 0.09 (0.05)                              | -0.06 (0.04)               |
| Risk-taking Tendencies in Adolescence        | -0.11 (0.04)**                           | -0.03 (0.04)                             | -0.01 (0.03)               |
| Well-being in Adolescence                    | 0.11 (0.04)**                            | -0.08 (0.04)                             | -0.04 (0.03)               |
| Confidence in Government's Pandemic Response | -0.07 (0.04)                             | -0.12 (0.04)**                           | -0.05 (0.04)               |
| Male                                         | -0.65 (0.08)**                           | -0.29 (0.07)**                           | -0.09 (0.05)               |
| Parental Education                           | 0.06 (0.04)                              | -0.01 (0.04)                             | 0.09 (0.03)**              |
| Weeks since Schools Closed                   | -0.05 (0.06)                             | 0.08 (0.07)                              | 0.02 (0.06)                |
| Well-being*Parental Education                | 0.02 (0.03)                              | 0.07 (0.03)*                             | 0.02 (0.03)                |
| <b>Italy</b>                                 |                                          |                                          |                            |
| Intercept                                    | 0.18 (0.08)*                             | 0.29 (0.09)**                            | -0.16 (0.08)*              |
| Externalizing Problems in Adolescence        | -0.03 (0.05)                             | -0.02 (0.05)                             | -0.26 (0.13)*              |
| Internalizing Problems in Adolescence        | 0.11 (0.04)*                             | 0.09 (0.05)                              | 0.26 (0.13)*               |
| Risk-taking Tendencies in Adolescence        | -0.11 (0.04)**                           | -0.03 (0.04)                             | -0.01 (0.03)               |
| Well-being in Adolescence                    | -0.2 (0.07)**                            | -0.08 (0.04)                             | -0.04 (0.03)               |
| Confidence in Government's Pandemic Response | -0.07 (0.04)                             | -0.12 (0.04)**                           | -0.05 (0.04)               |
| Male                                         | -0.65 (0.08)**                           | -0.29 (0.07)**                           | -0.09 (0.05)               |
| Parental Education                           | 0.06 (0.04)                              | -0.01 (0.04)                             | 0.09 (0.03)**              |
| Weeks since Schools Closed                   | -0.05 (0.06)                             | 0.08 (0.07)                              | 0.02 (0.06)                |
| Well-being*Parental Education                | 0.02 (0.03)                              | 0.07 (0.03)*                             | 0.02 (0.03)                |
| <b>Jordan</b>                                |                                          |                                          |                            |
| Intercept                                    | 0.09 (0.15)                              | 0.32 (0.12)**                            | 0.32 (0.07)**              |
| Externalizing Problems in Adolescence        | -0.03 (0.05)                             | -0.02 (0.05)                             | 0 (0.05)                   |
| Internalizing Problems in Adolescence        | 0.11 (0.04)*                             | 0.09 (0.05)                              | -0.06 (0.04)               |
| Risk-taking Tendencies in Adolescence        | -0.11 (0.04)**                           | -0.03 (0.04)                             | -0.01 (0.03)               |
| Well-being in Adolescence                    | 0.11 (0.04)**                            | -0.08 (0.04)                             | -0.04 (0.03)               |
| Confidence in Government's Pandemic Response | -0.07 (0.04)                             | -0.12 (0.04)**                           | -0.05 (0.04)               |

|                                              |                |                |                |
|----------------------------------------------|----------------|----------------|----------------|
| Male                                         | -0.21 (0.19)   | -0.29 (0.07)** | -0.09 (0.05)   |
| Parental Education                           | 0.06 (0.04)    | -0.01 (0.04)   | 0.09 (0.03)**  |
| Weeks since Schools Closed                   | 0.66 (0.23)**  | 0.08 (0.07)    | 0.02 (0.06)    |
| Well-being*Parental Education                | 0.02 (0.03)    | 0.07 (0.03)*   | 0.02 (0.03)    |
| Kenya                                        |                |                |                |
| Intercept                                    | 0.04 (0.18)    | -0.19 (0.16)   | -0.14 (0.18)   |
| Externalizing Problems in Adolescence        | -0.03 (0.05)   | -0.02 (0.05)   | 0 (0.05)       |
| Internalizing Problems in Adolescence        | 0.11 (0.04)*   | 0.09 (0.05)    | -0.06 (0.04)   |
| Risk-taking Tendencies in Adolescence        | -0.11 (0.04)** | -0.03 (0.04)   | -0.01 (0.03)   |
| Well-being in Adolescence                    | 0.11 (0.04)**  | -0.08 (0.04)   | -0.04 (0.03)   |
| Confidence in Government's Pandemic Response | -0.07 (0.04)   | -0.12 (0.04)** | -0.05 (0.04)   |
| Male                                         | 0.04 (0.21)    | -0.29 (0.07)** | -0.09 (0.05)   |
| Parental Education                           | 0.06 (0.04)    | -0.01 (0.04)   | 0.09 (0.03)**  |
| Weeks since Schools Closed                   | -0.05 (0.06)   | 0.08 (0.07)    | 0.02 (0.06)    |
| Well-being*Parental Education                | 0.02 (0.03)    | 0.07 (0.03)*   | 0.02 (0.03)    |
| Philippines                                  |                |                |                |
| Intercept                                    | 0.73 (0.12)**  | 0.11 (0.12)    | -0.72 (0.18)** |
| Externalizing Problems in Adolescence        | -0.03 (0.05)   | -0.02 (0.05)   | 0 (0.05)       |
| Internalizing Problems in Adolescence        | 0.11 (0.04)*   | 0.09 (0.05)    | -0.06 (0.04)   |
| Risk-taking Tendencies in Adolescence        | -0.11 (0.04)** | -0.03 (0.04)   | -0.01 (0.03)   |
| Well-being in Adolescence                    | 0.11 (0.04)**  | -0.08 (0.04)   | -0.04 (0.03)   |
| Confidence in Government's Pandemic Response | -0.07 (0.04)   | -0.36 (0.09)** | -0.05 (0.04)   |
| Male                                         | -0.65 (0.08)** | -0.29 (0.07)** | -0.09 (0.05)   |
| Parental Education                           | 0.06 (0.04)    | -0.01 (0.04)   | 0.09 (0.03)**  |
| Weeks since Schools Closed                   | -0.05 (0.06)   | 0.08 (0.07)    | 0.02 (0.06)    |
| Well-being*Parental Education                | 0.02 (0.03)    | 0.07 (0.03)*   | 0.02 (0.03)    |
| Sweden                                       |                |                |                |
| Intercept                                    | 0.13 (0.13)    | 0.25 (0.13)    | 0.09 (0.09)    |
| Externalizing Problems in Adolescence        | -0.03 (0.05)   | -0.02 (0.05)   | 0 (0.05)       |
| Internalizing Problems in Adolescence        | 0.11 (0.04)*   | 0.09 (0.05)    | -0.06 (0.04)   |
| Risk-taking Tendencies in Adolescence        | 0.22 (0.15)    | -0.03 (0.04)   | -0.01 (0.03)   |
| Well-being in Adolescence                    | 0.11 (0.04)**  | -0.08 (0.04)   | -0.04 (0.03)   |
| Confidence in Government's Pandemic Response | -0.07 (0.04)   | -0.12 (0.04)** | -0.05 (0.04)   |
| Male                                         | -0.65 (0.08)** | -0.29 (0.07)** | -0.09 (0.05)   |
| Parental Education                           | 0.06 (0.04)    | -0.01 (0.04)   | 0.09 (0.03)**  |
| Weeks since Schools Closed                   | -0.05 (0.06)   | 0.08 (0.07)    | 0.02 (0.06)    |
| Well-being*Parental Education                | 0.02 (0.03)    | 0.07 (0.03)*   | 0.02 (0.03)    |
| Thailand                                     |                |                |                |
| Intercept                                    | -0.45 (0.15)** | 1.74 (0.69)*   | -0.08 (0.12)   |
| Externalizing Problems in Adolescence        | -0.03 (0.05)   | -0.02 (0.05)   | -0.76 (0.17)** |
| Internalizing Problems in Adolescence        | 0.11 (0.04)*   | 0.09 (0.05)    | 0.4 (0.08)**   |
| Risk-taking Tendencies in Adolescence        | -0.11 (0.04)** | -0.03 (0.04)   | -0.01 (0.03)   |
| Well-being in Adolescence                    | 0.11 (0.04)**  | -0.08 (0.04)   | -0.04 (0.03)   |
| Confidence in Government's Pandemic Response | -0.07 (0.04)   | -0.12 (0.04)** | -0.05 (0.04)   |
| Male                                         | -0.17 (0.19)   | -0.29 (0.07)** | -0.09 (0.05)   |
| Parental Education                           | 0.06 (0.04)    | -0.01 (0.04)   | 0.09 (0.03)**  |
| Weeks since Schools Closed                   | -0.05 (0.06)   | 2.17 (0.65)**  | 0.02 (0.06)    |
| Well-being*Parental Education                | 0.02 (0.03)    | -0.17 (0.08)*  | 0.02 (0.03)    |

|                                              |                            |                            |                            |
|----------------------------------------------|----------------------------|----------------------------|----------------------------|
| United States                                |                            |                            |                            |
| Intercept                                    | 0.42 (0.10)**              | 0.10 (0.09)                | 0.25 (0.11)*               |
| Externalizing Problems in Adolescence        | -0.03 (0.05)               | -0.02 (0.05)               | 0 (0.05)                   |
| Internalizing Problems in Adolescence        | 0.11 (0.04)*               | 0.09 (0.05)                | -0.06 (0.04)               |
| Risk-taking Tendencies in Adolescence        | 0.25 (0.10)*               | -0.03 (0.04)               | -0.01 (0.03)               |
| Well-being in Adolescence                    | -0.28 (0.08)**             | -0.32 (0.07)**             | -0.04 (0.03)               |
| Confidence in Government's Pandemic Response | -0.07 (0.04)               | -0.12 (0.04)**             | -0.05 (0.04)               |
| Male                                         | -0.65 (0.08)**             | -0.29 (0.07)**             | -0.09 (0.05)               |
| Parental Education                           | 0.06 (0.04)                | 0.29 (0.09)**              | 0.09 (0.03)**              |
| Weeks since Schools Closed                   | -0.05 (0.06)               | 0.08 (0.07)                | 0.02 (0.06)                |
| Well-being*Parental Education                | 0.02 (0.03)                | 0.07 (0.03)*               | 0.02 (0.03)                |
| Model Fit Statistics                         |                            |                            |                            |
| Chi Square (DOF), <i>p</i> -value            | 70.41 (64), <i>p</i> =0.27 | 66.44 (67), <i>p</i> =0.50 | 67.88 (66), <i>p</i> =0.41 |
| RMSEA                                        | 0.03                       | 0                          | 0.01                       |
| CFI                                          | 0.95                       | 1                          | 0.97                       |
| SRMR                                         | 0.03                       | 0.031                      | 0.031                      |

b=standardized coefficient. \**p* < .05, \*\**p* < .01.

Supplemental Figure 1: Moderation of Relation between Internalizing Problems in Adolescence and Increase in Internalizing Problems during the Pandemic by Confidence of Government’s Handling of Pandemic

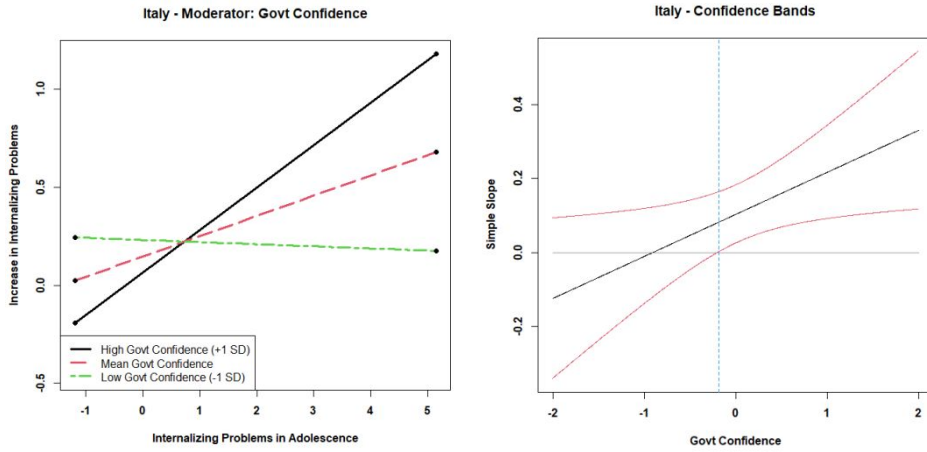



Supplemental Figure 2: Moderation of Relation between Externalizing Problems in Adolescence and Increase in Internalizing Problems during the Pandemic by Parental Education

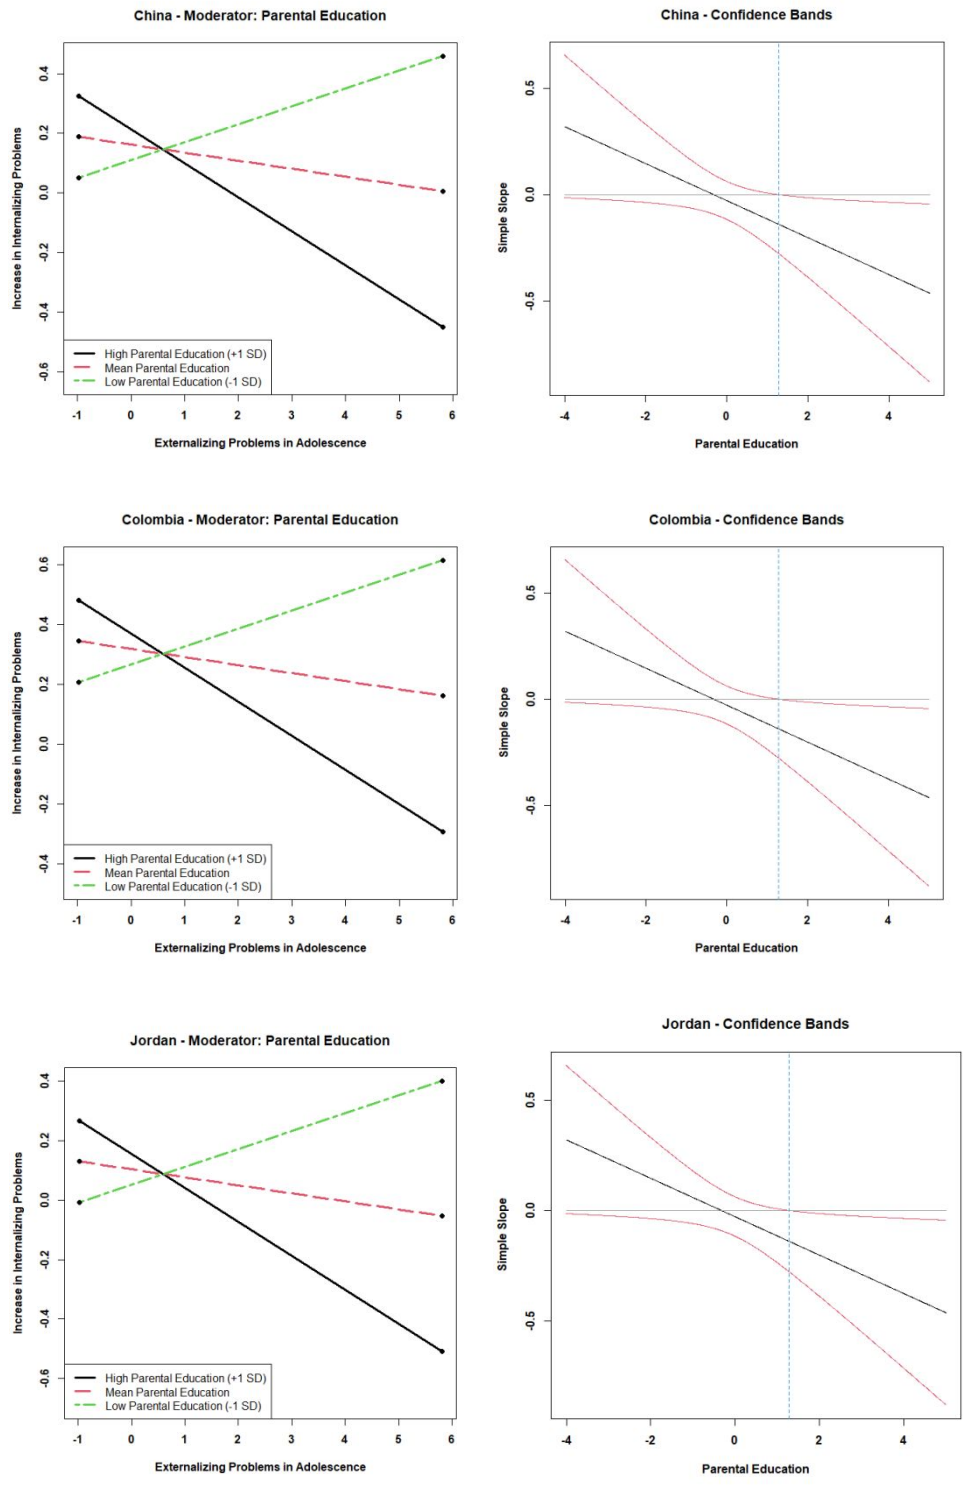

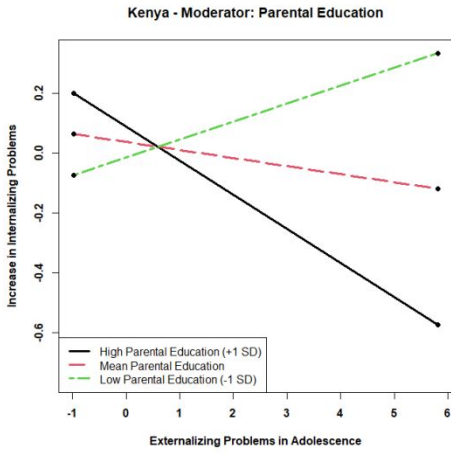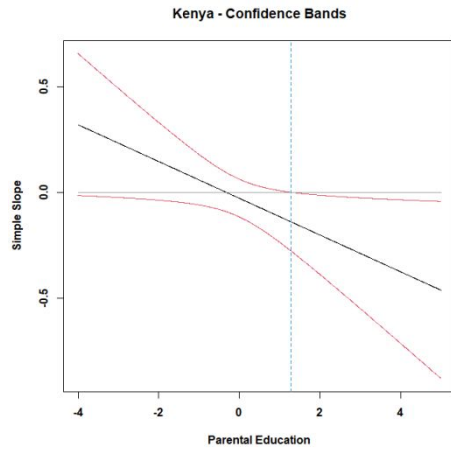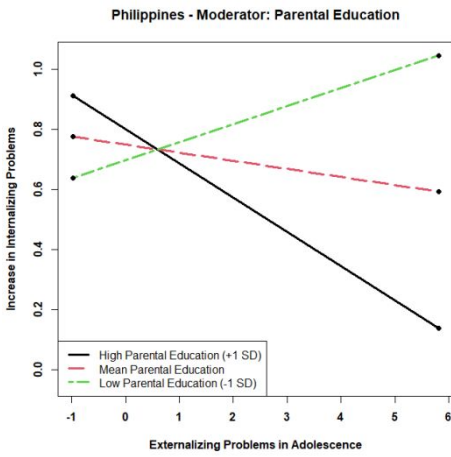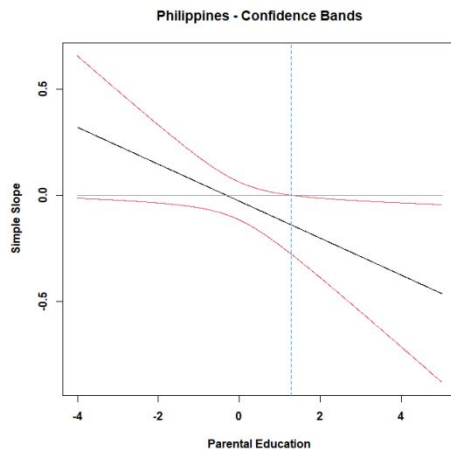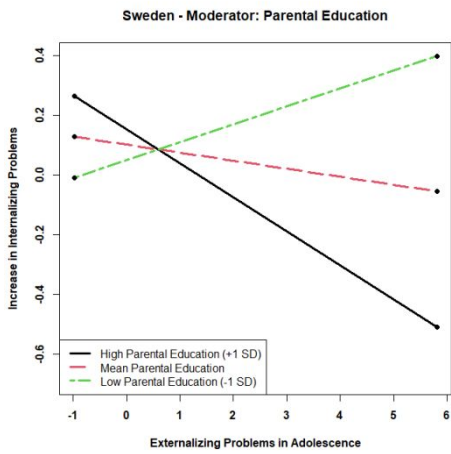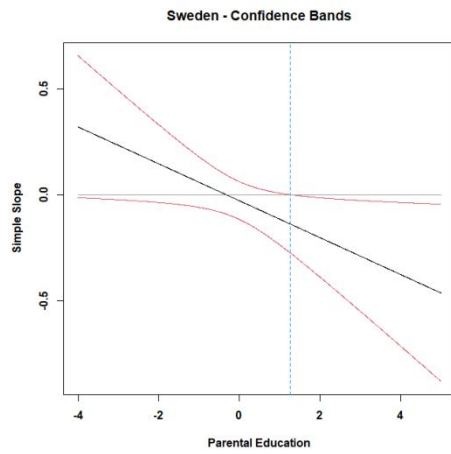

Thailand - Moderator: Parental Education

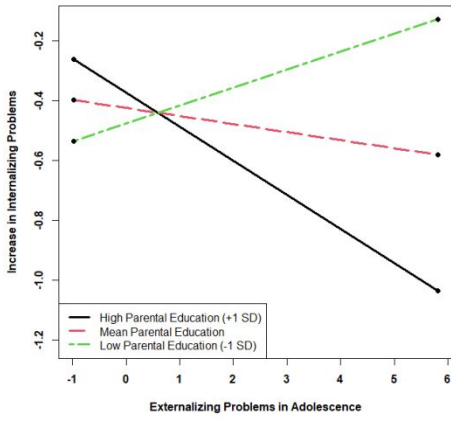

Thailand - Confidence Bands

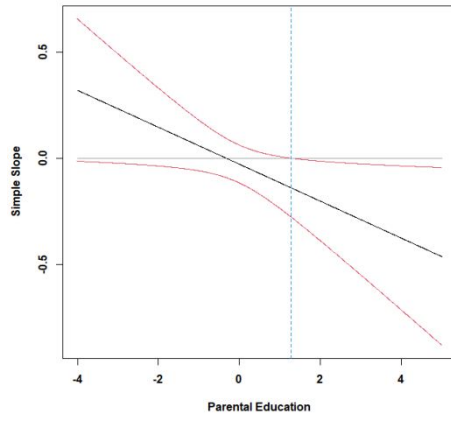

US - Moderator: Parental Education

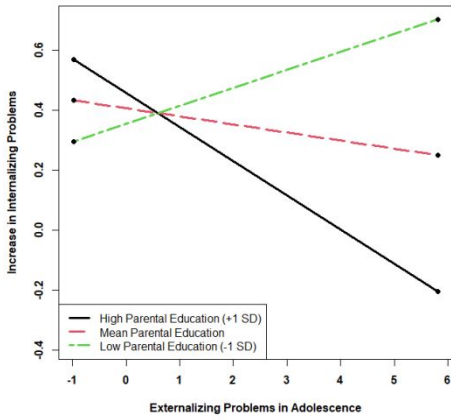

US - Confidence Bands

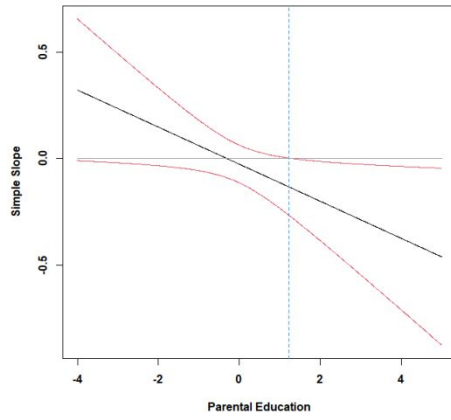

Supplemental Figure 3: Moderation of Relation between Risk-Taking Tendencies in Adolescence and Increase in Internalizing Problems during the Pandemic by Confidence of Government’s Handling of Pandemic

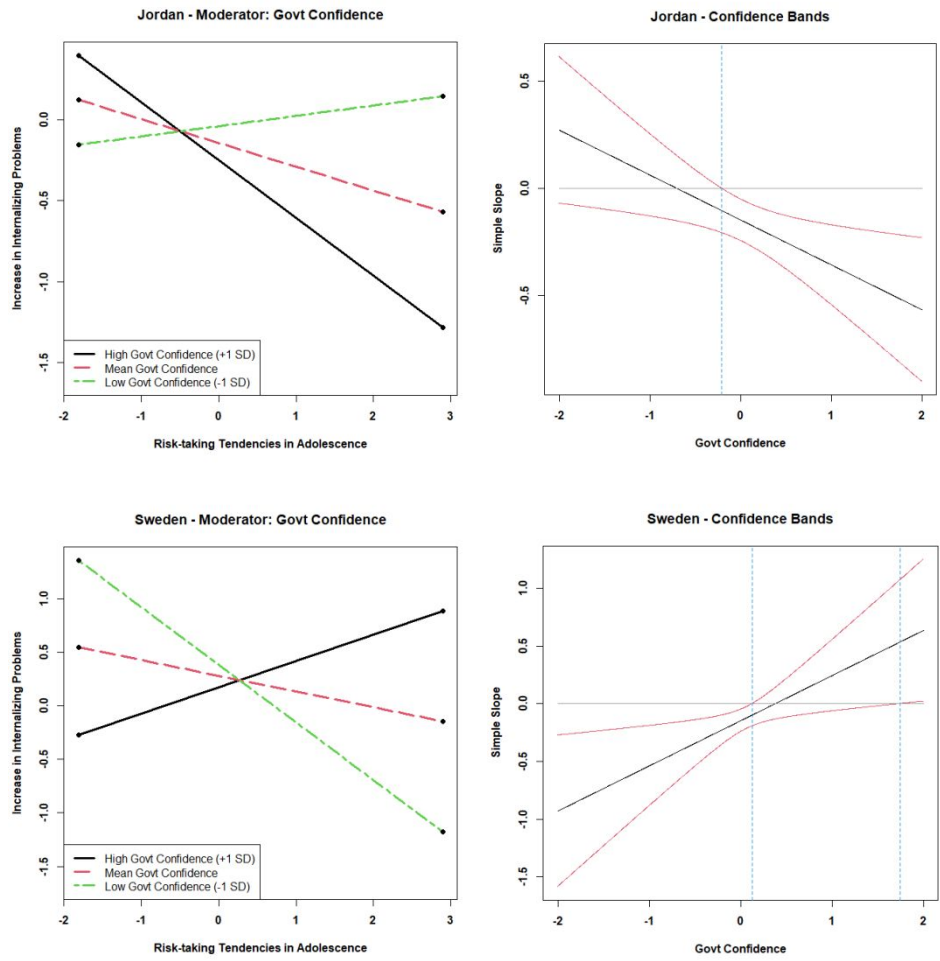

Supplemental Figure 4: Moderation of Relation between Risk-Taking Tendencies in Adolescence and Increase in Internalizing Problems during the Pandemic by Gender

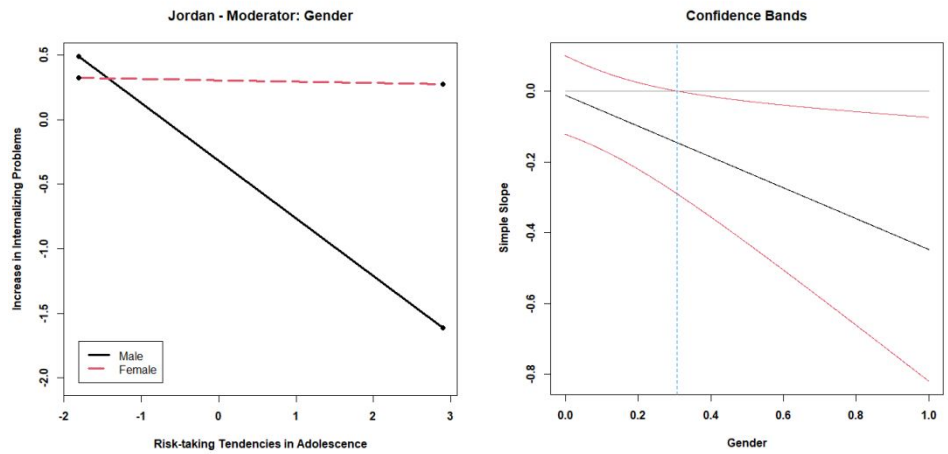

Supplemental Figure 5: Moderation of Relation between Risk-Taking Tendencies in Adolescence and Increase in Internalizing Problems during the Pandemic by Parental Education

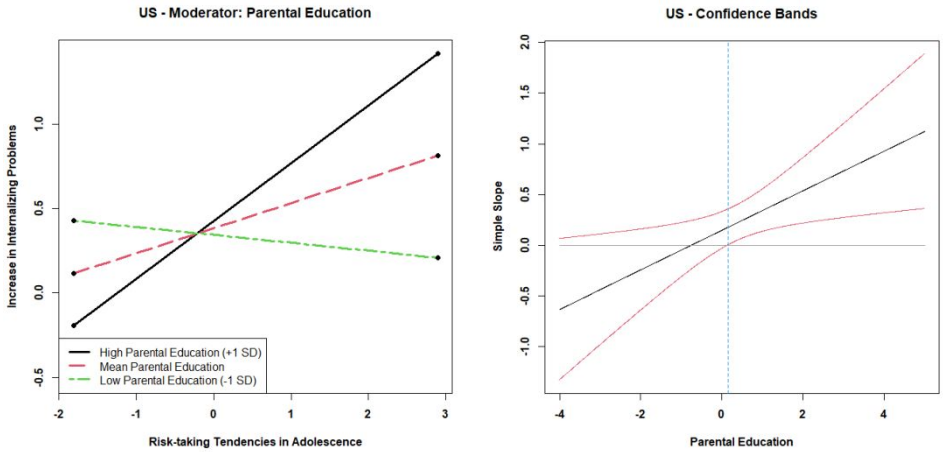

Supplemental Figure 6: Moderation of Relation between Risk-Taking Tendencies in Adolescence and Increase in Externalizing Problems during the Pandemic by Confidence of Government's Handling of Pandemic

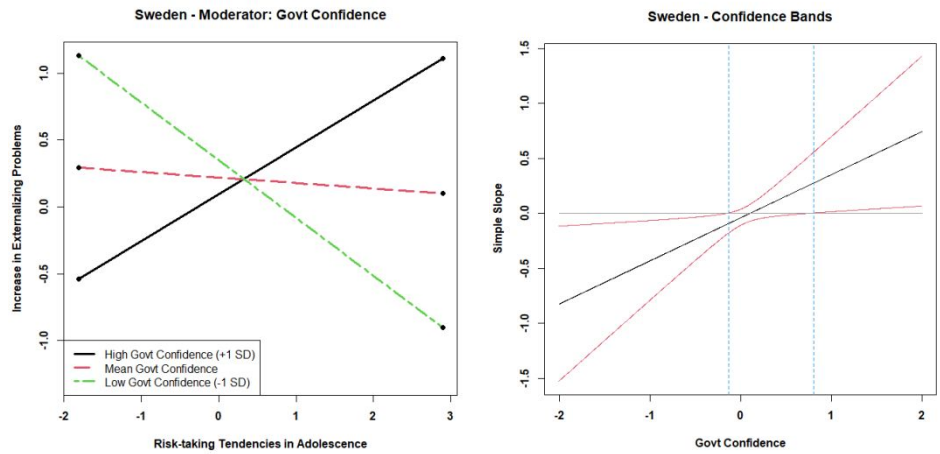

Supplemental Figure 7: Moderation of Relation between Risk-Taking Tendencies in Adolescence and Increase in Externalizing Problems during the Pandemic by Gender

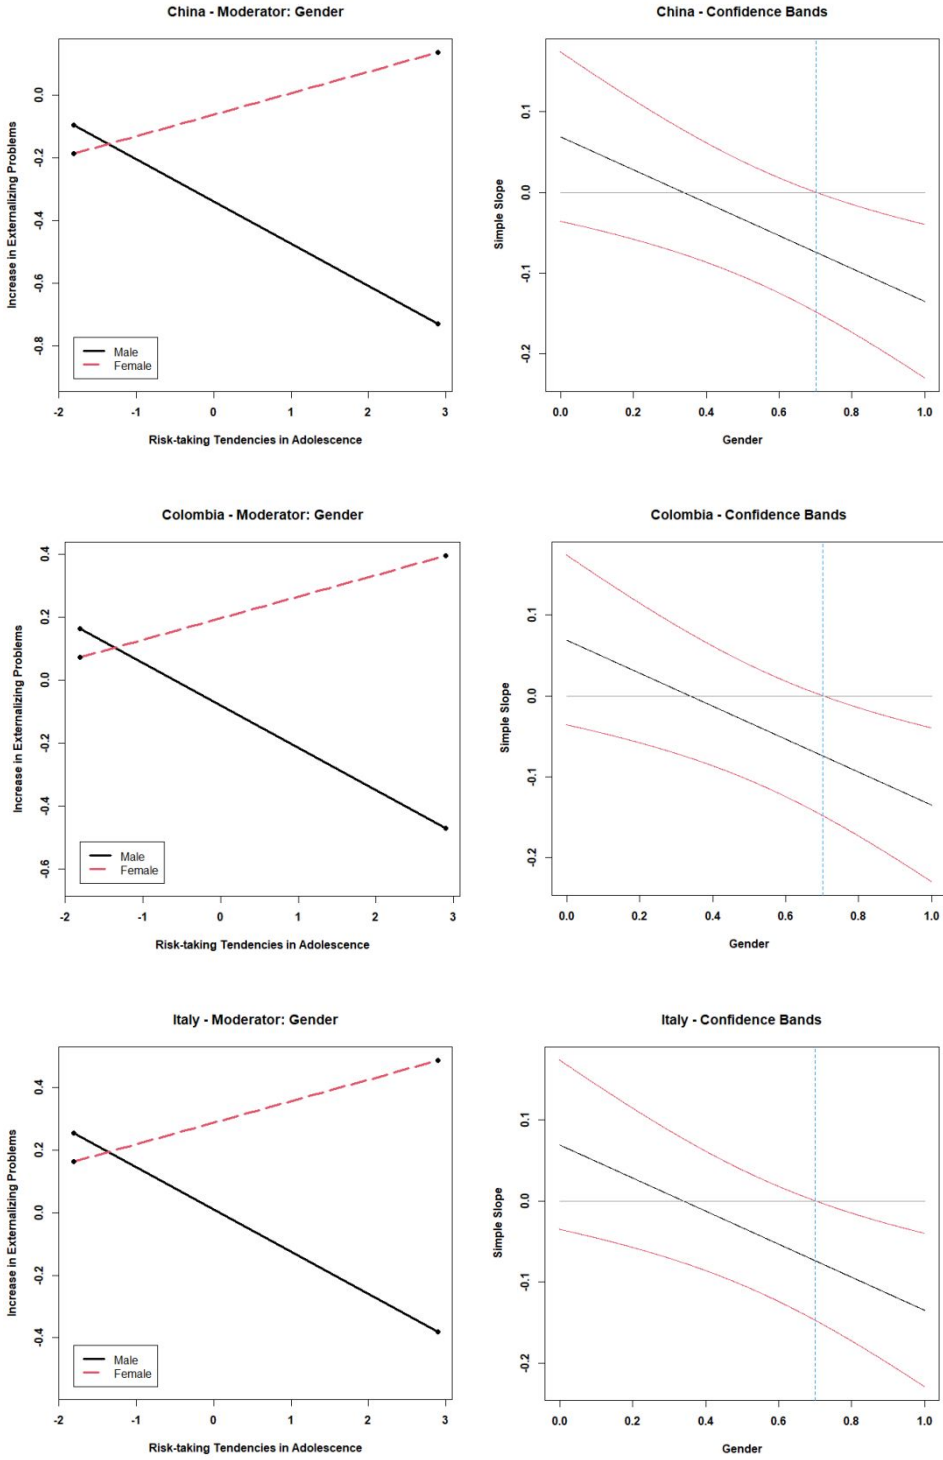



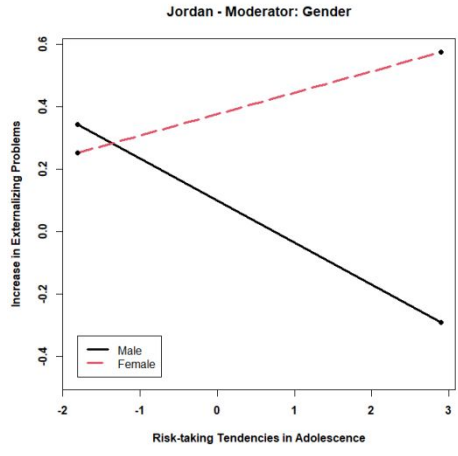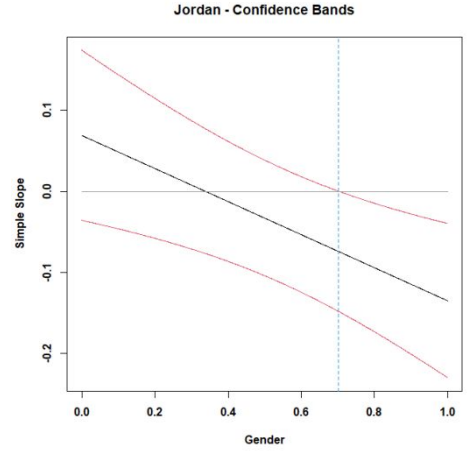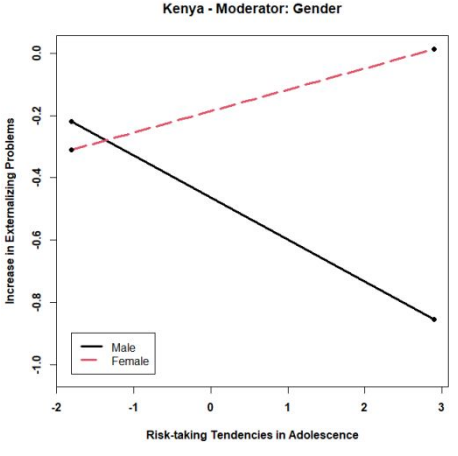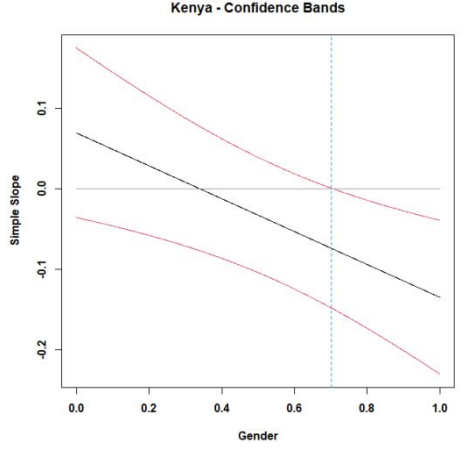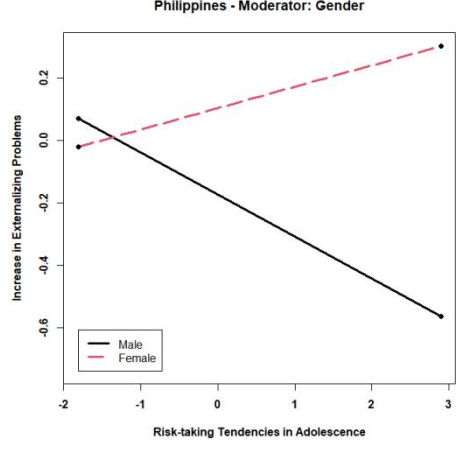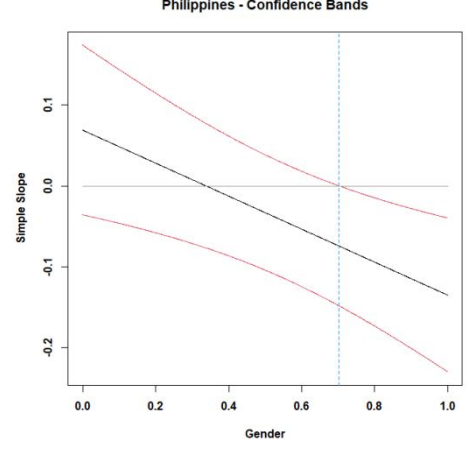

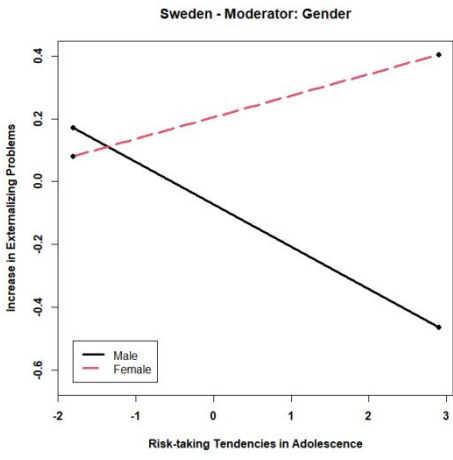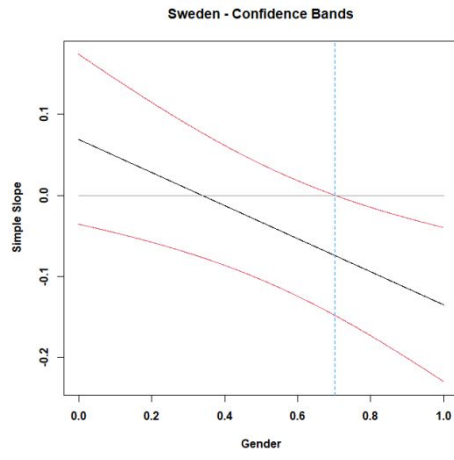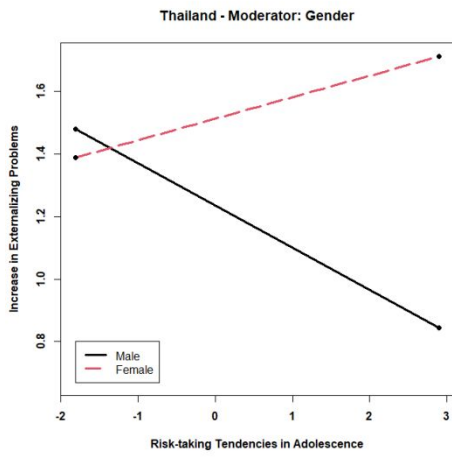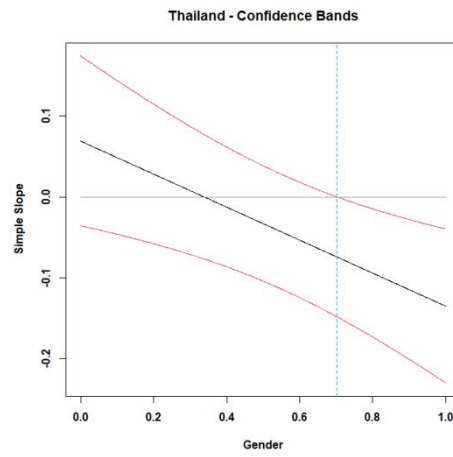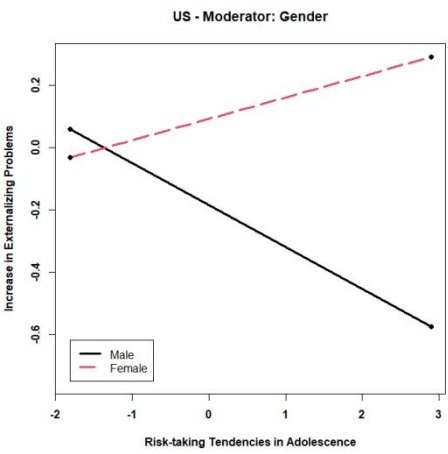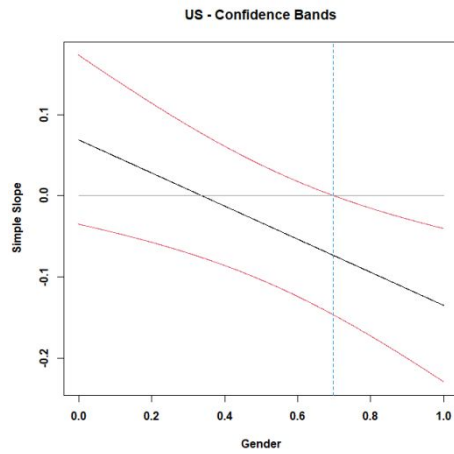

Supplemental Figure 8: Moderation of Relation between Well-being in Adolescence and Increase in Externalizing Problems during the Pandemic by Confidence of Government's Handling of Pandemic

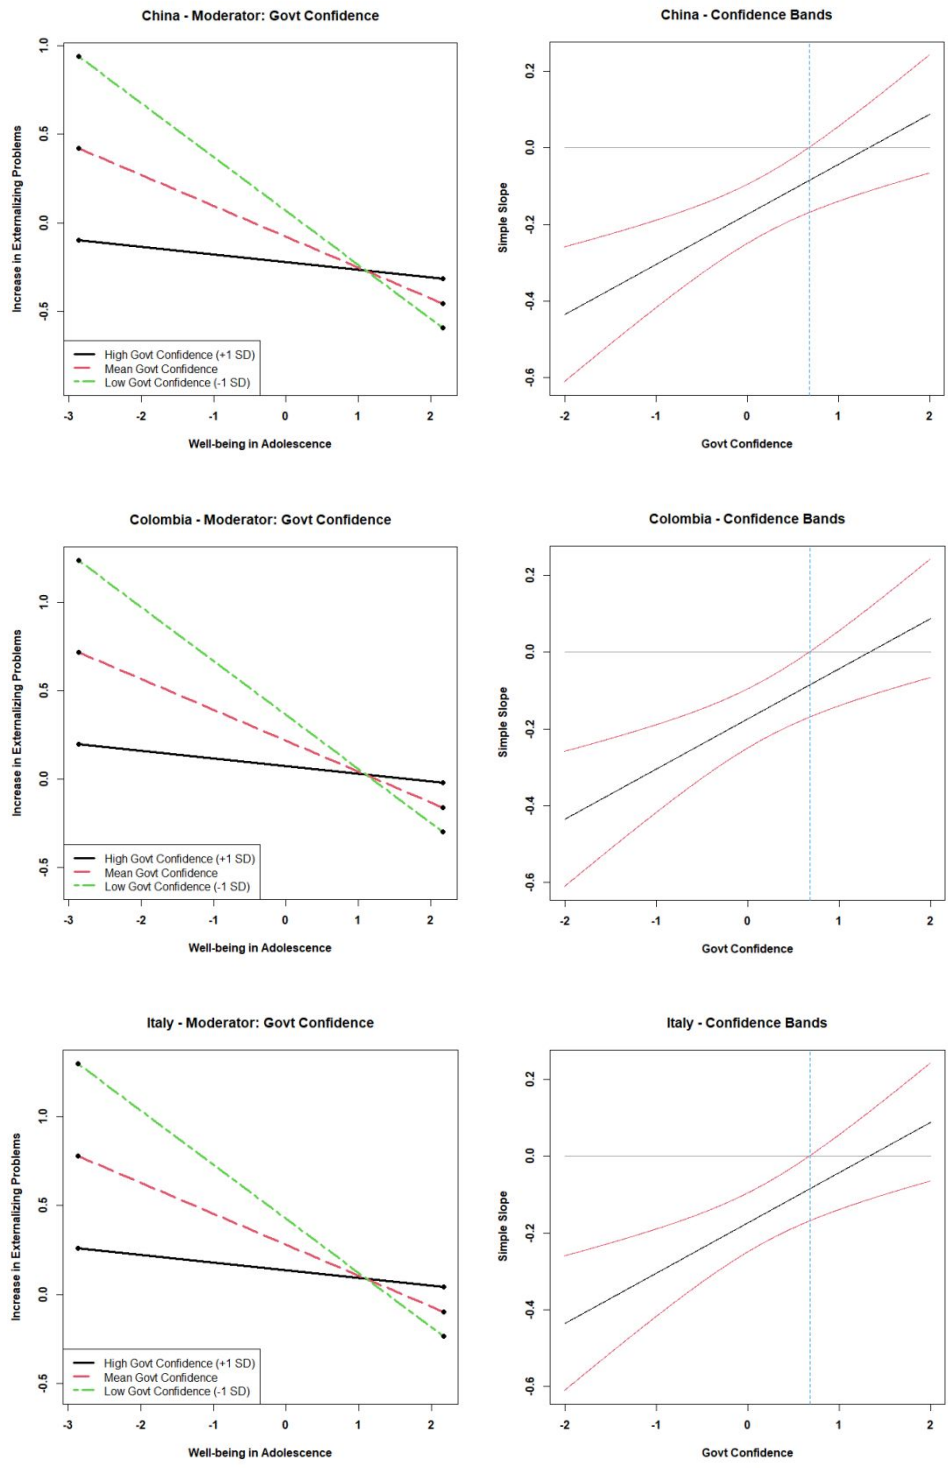

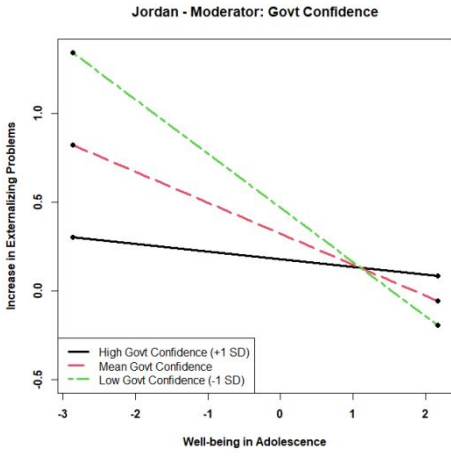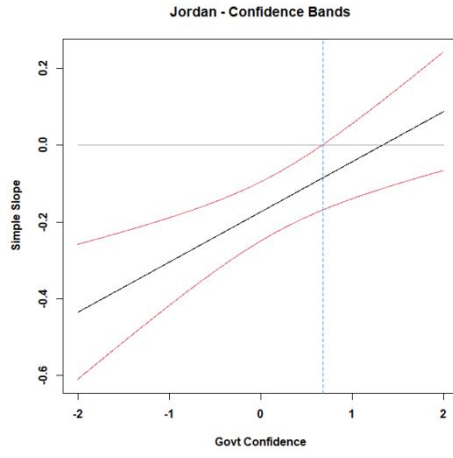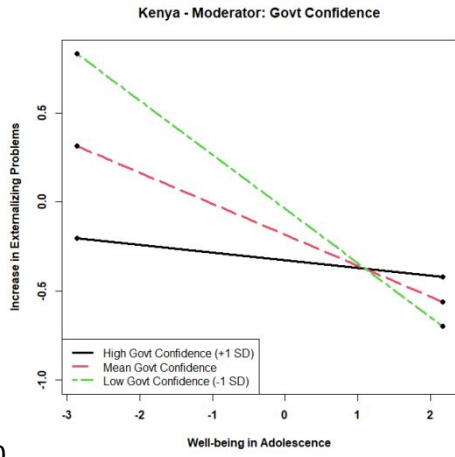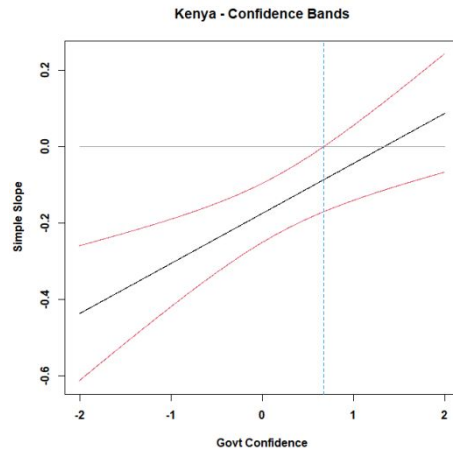

0

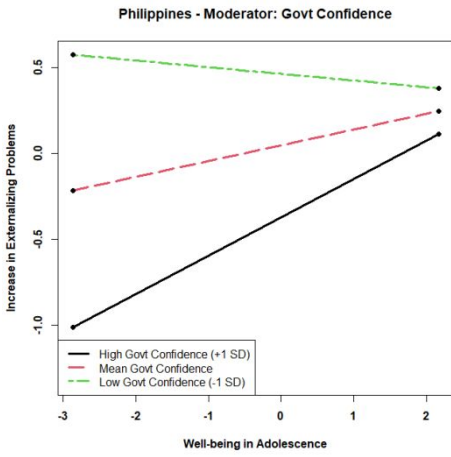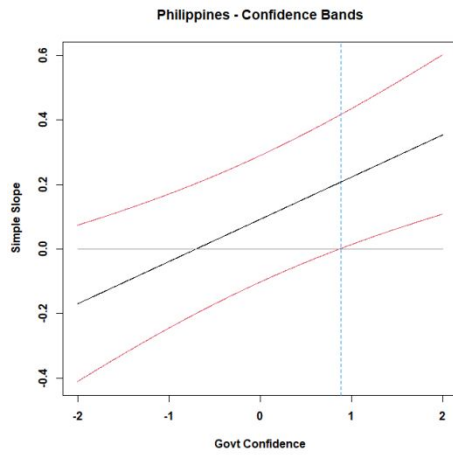

Sweden - Moderator: Govt Confidence

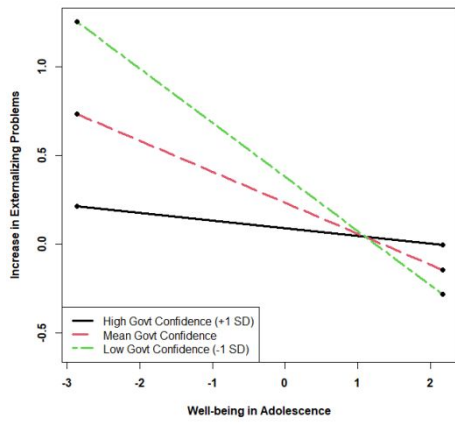

Sweden - Confidence Bands

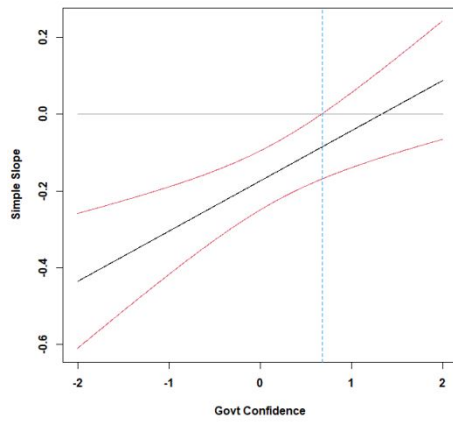

US - Moderator: Govt Confidence

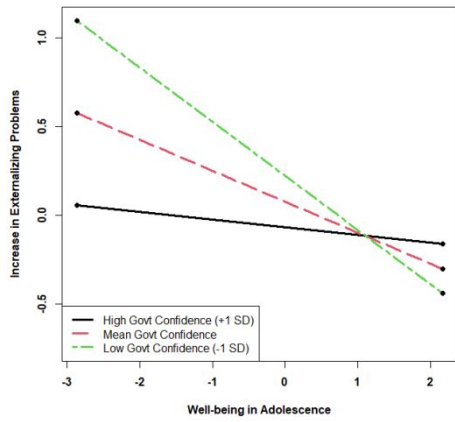

US - Confidence Bands

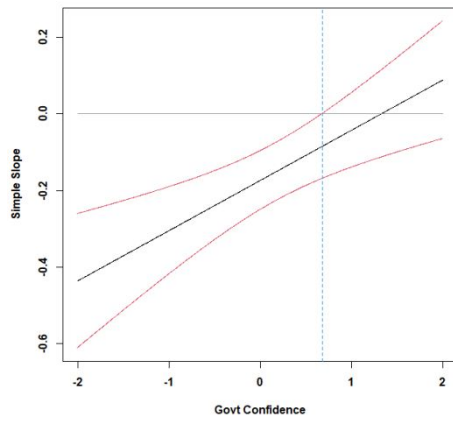

Supplemental Figure 9: Moderation of Relation between Well-being in Adolescence and Increase in Externalizing Problems during the Pandemic by Parental Education

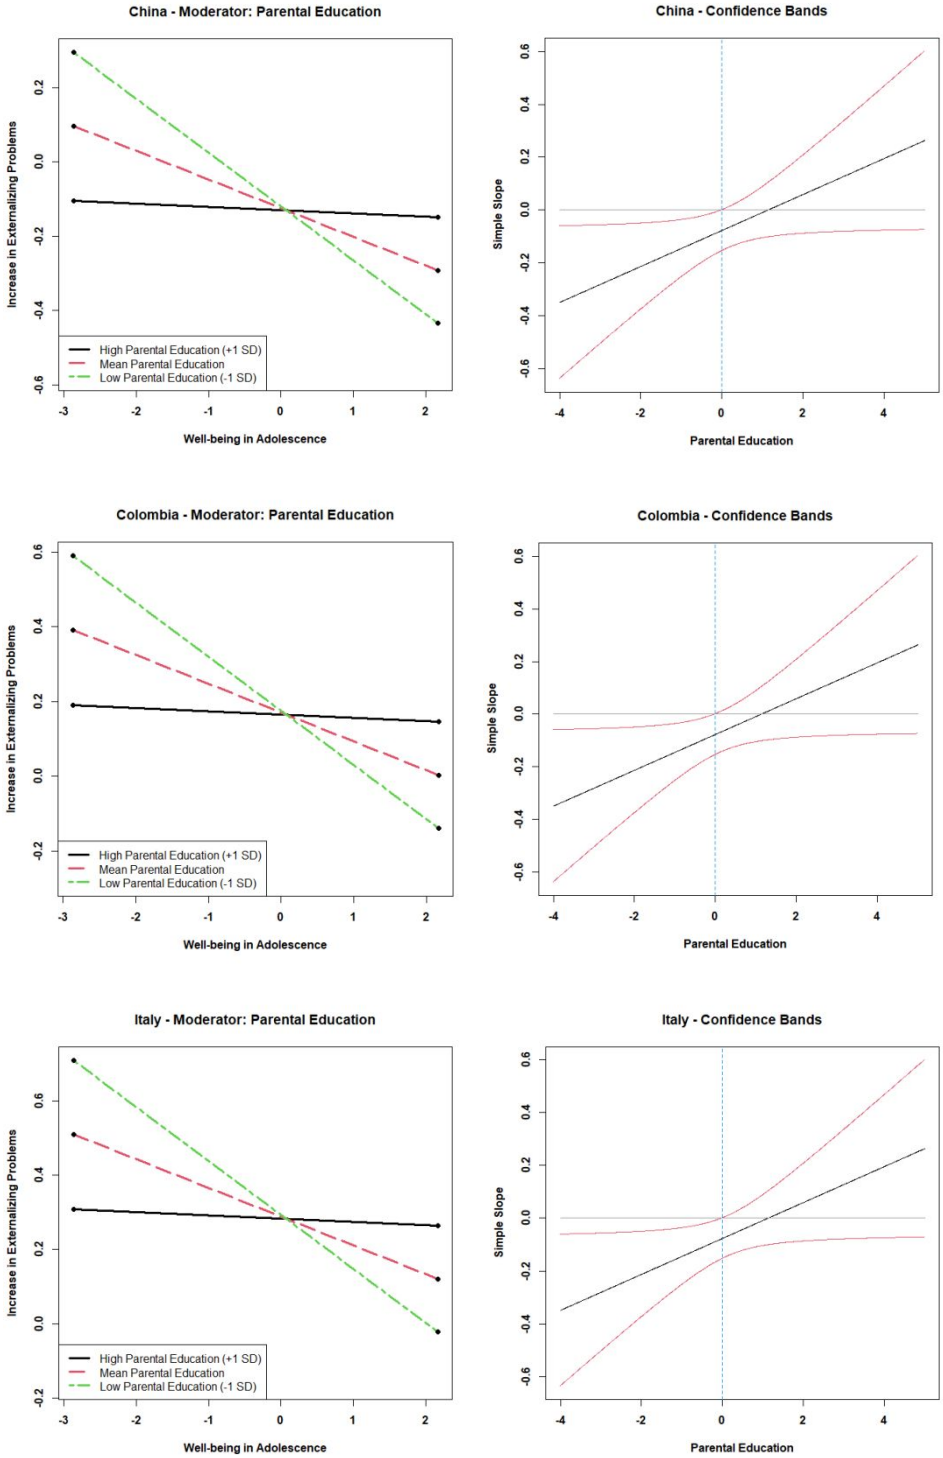

Jordan - Moderator: Parental Education

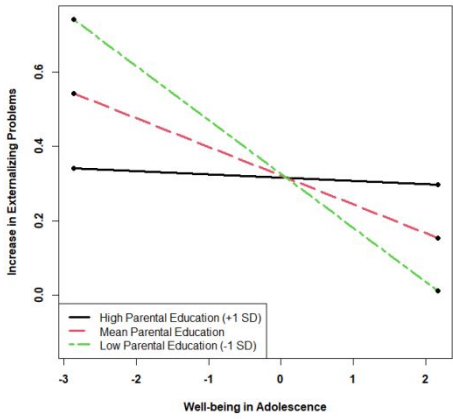

Jordan - Confidence Bands

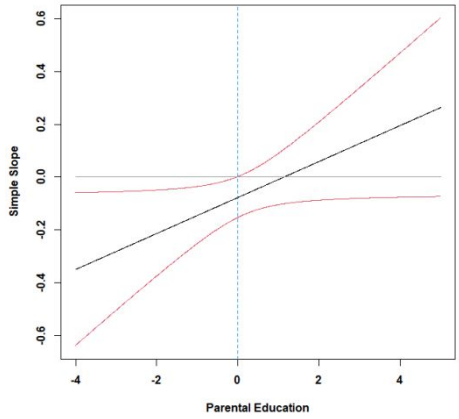

Kenya - Moderator: Parental Education

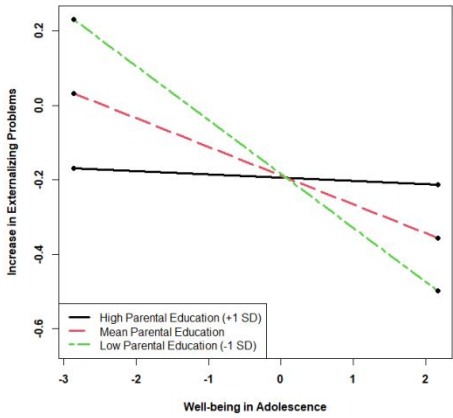

Kenya - Confidence Bands

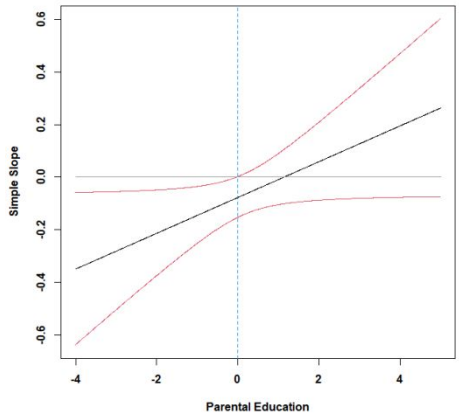

Philippines - Moderator: Parental Education

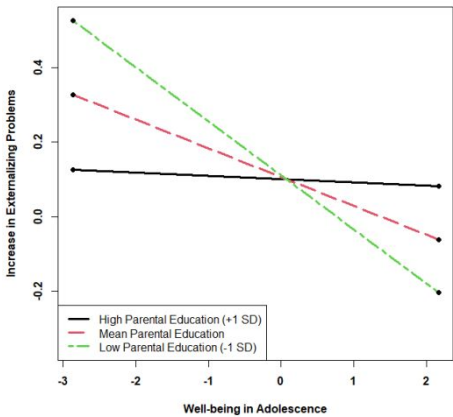

Philippines - Confidence Bands

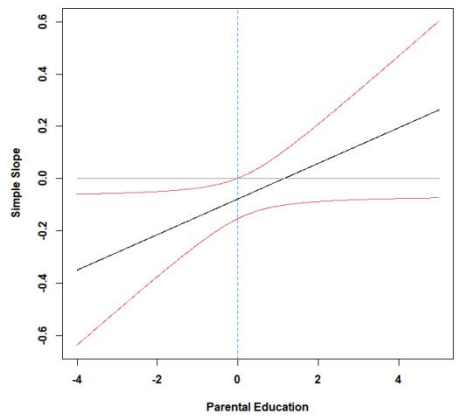

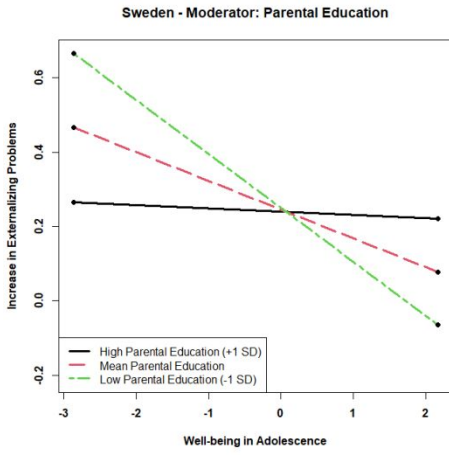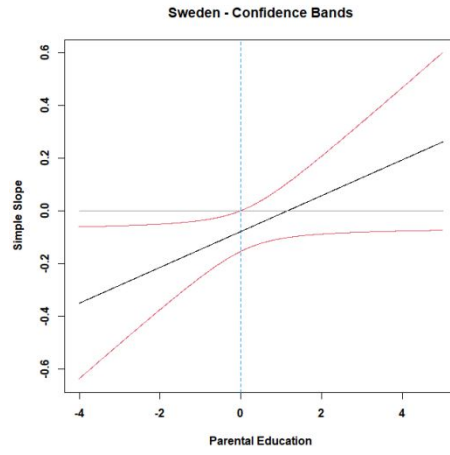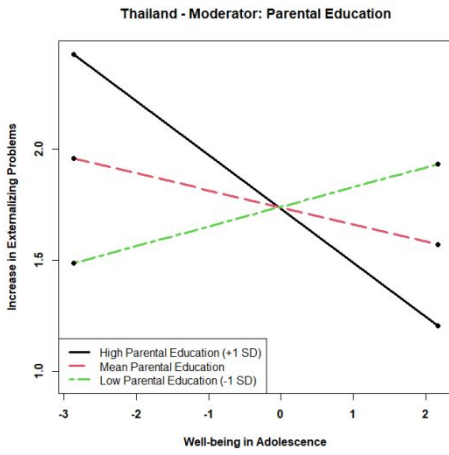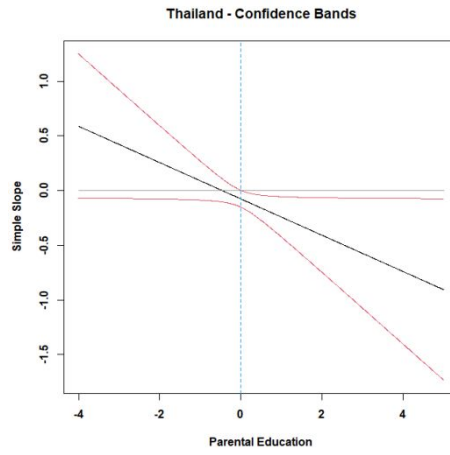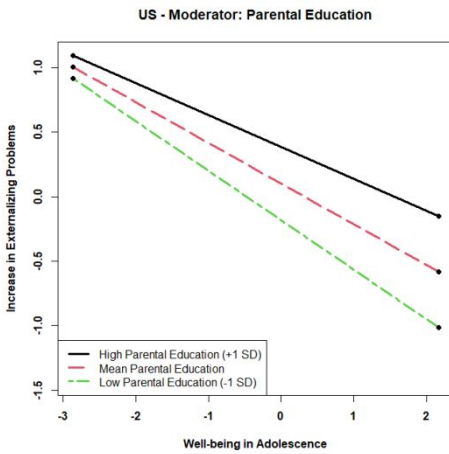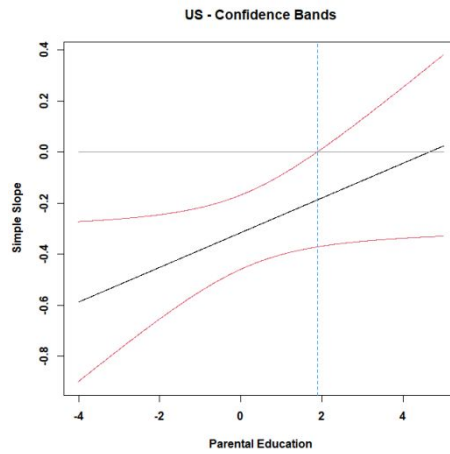



Supplemental Figure 10: Moderation of Relation between Well-being in Adolescence and Change in Substance Use during the Pandemic by Confidence of Government's Handling of Pandemic

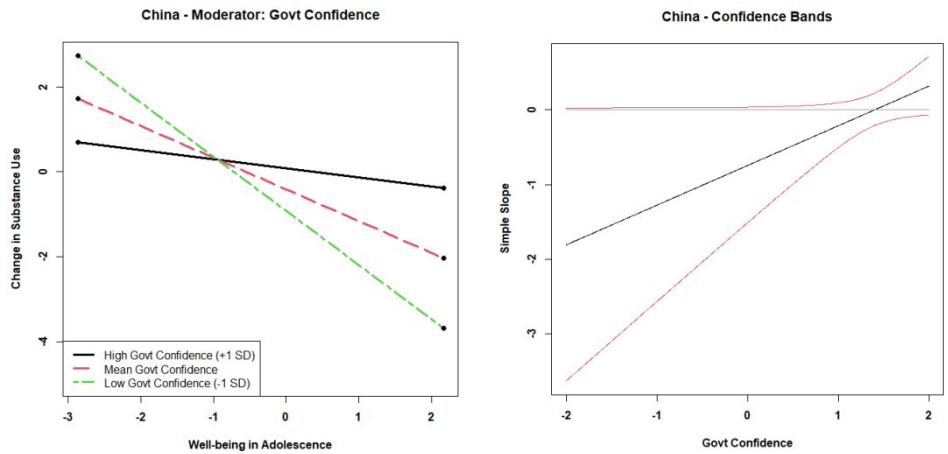

Supplemental Figure 11: Moderation of Relation between Well-being in Adolescence and Change in Substance Use during the Pandemic by Gender

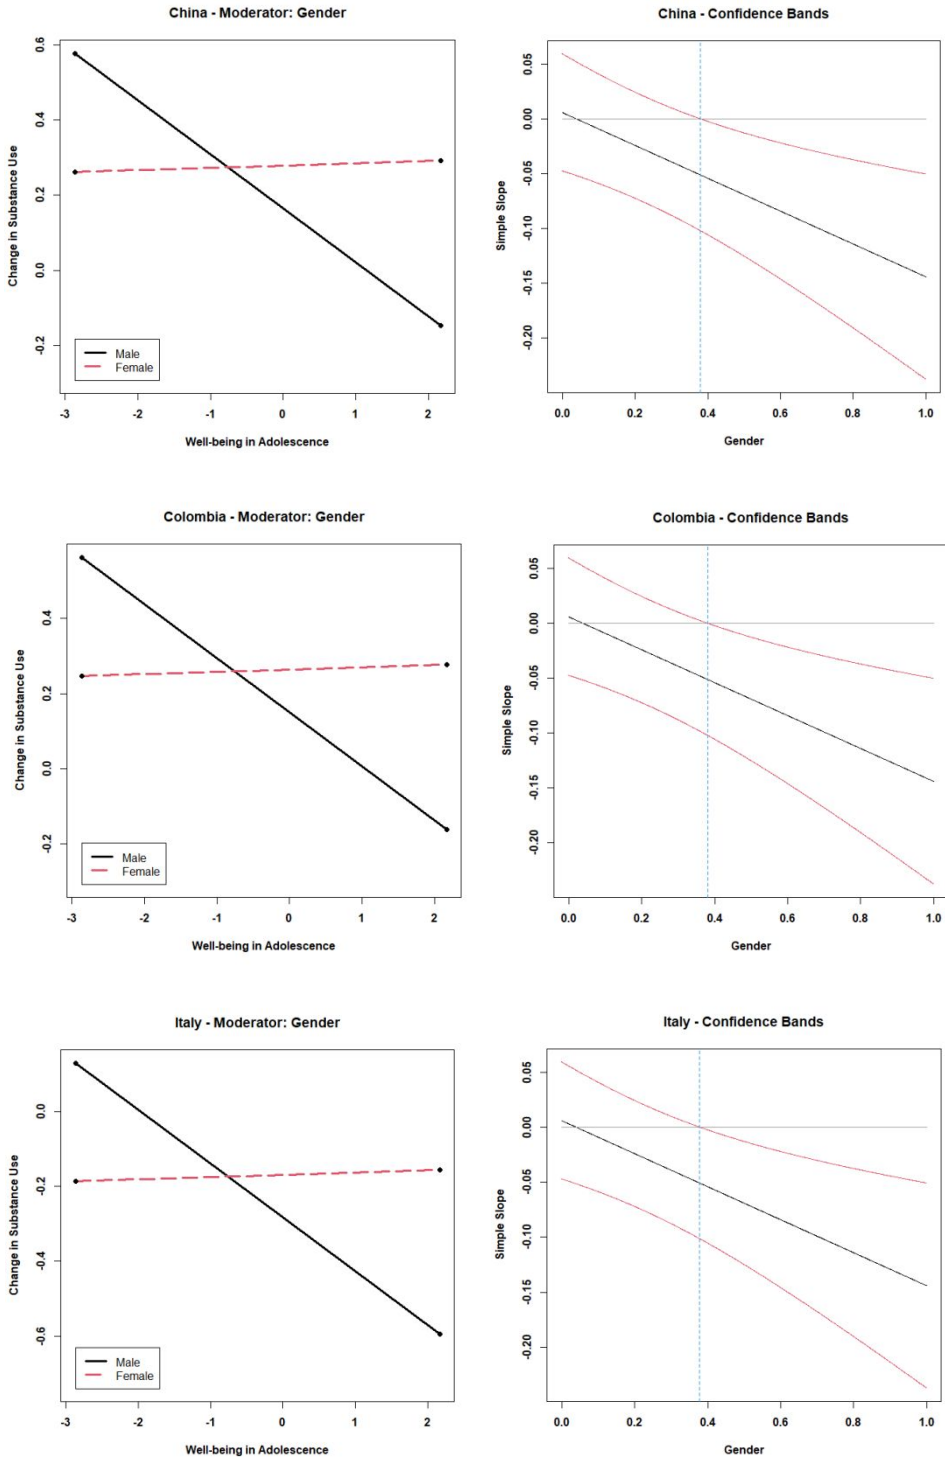

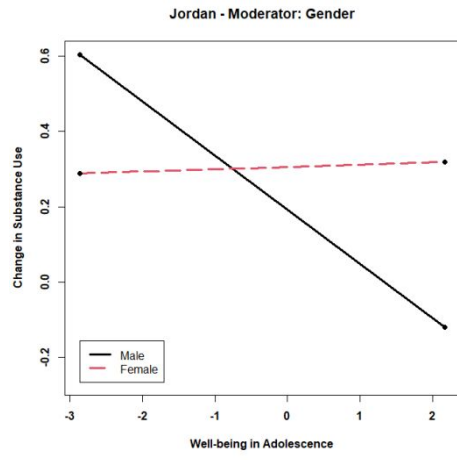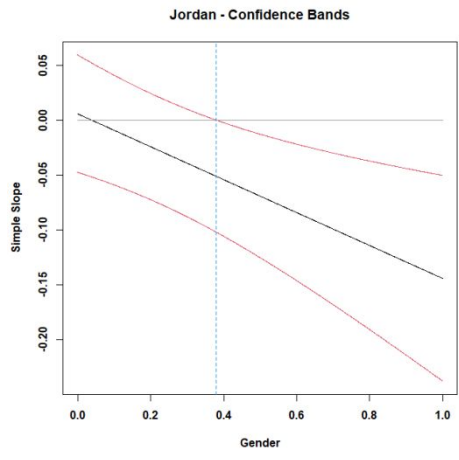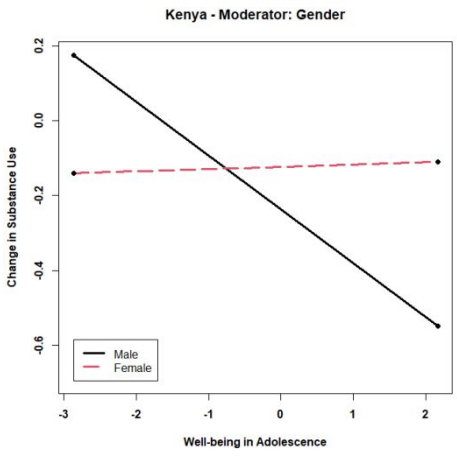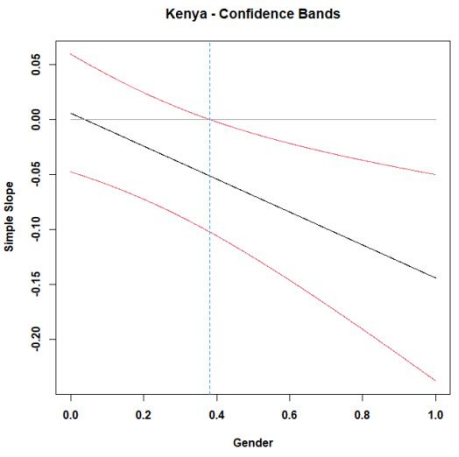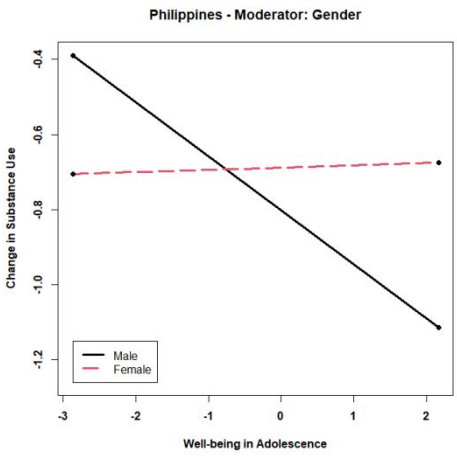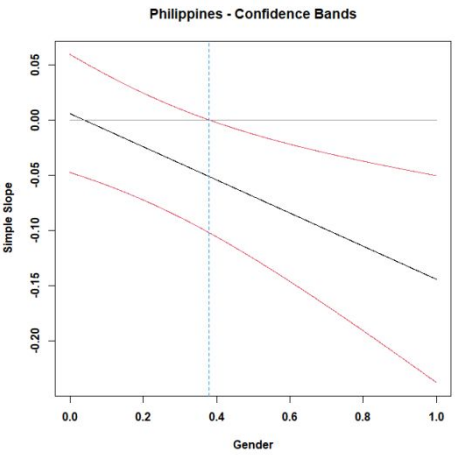

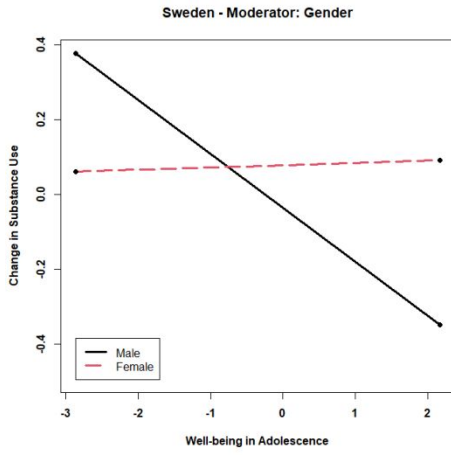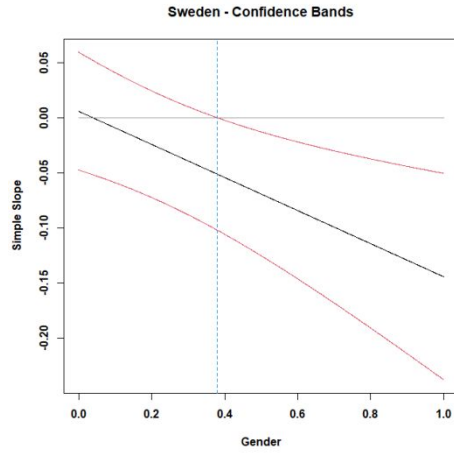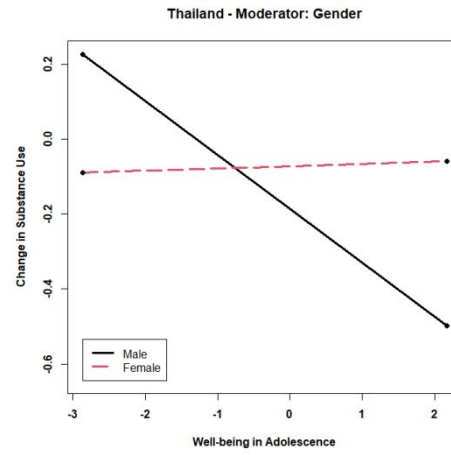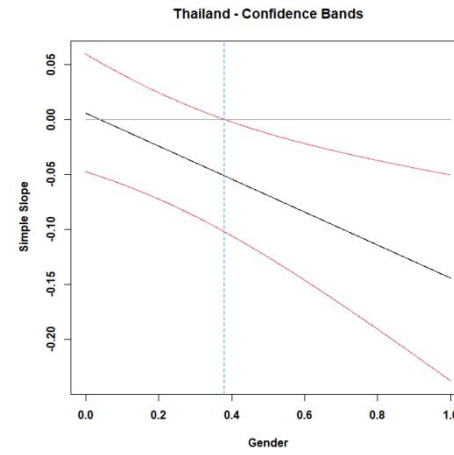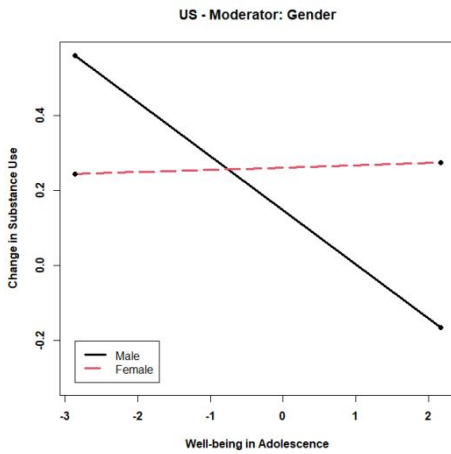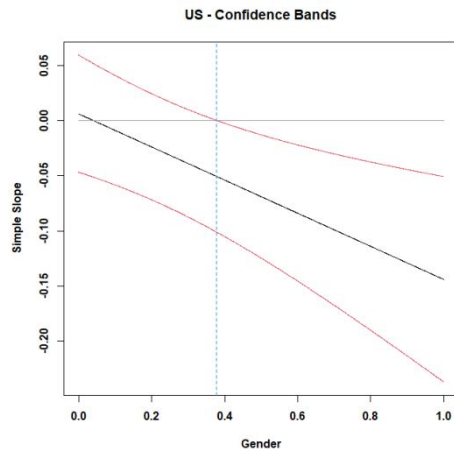

Supplement: NIHMS1734971-supplement-1.pdf [file NIHMS1734971-supplement-1.pdf]
